# Supplementary material for: Positional effects of electron-donating and withdrawing groups on the photophysical properties of single benzene fluorophores
Source: Royal Society of Chemistry journal article supplement (doi:10.1039/d4cc04451g), 2024-01-01
Supplement: d4cc04451g1.pdf [file d4cc04451g1.pdf]

*Electronic Supporting Information*

Positional effects of electron-donating and withdrawing groups on the photophysical properties of single benzene fluorophores

|                                                                                                                                                                          |     |
|--------------------------------------------------------------------------------------------------------------------------------------------------------------------------|-----|
| <i>General methods and materials</i>                                                                                                                                     | S2  |
| <i>General procedures for nitration, reduction, acetylation, deacetylation and esterification</i>                                                                        | S3  |
| <i>Synthetic procedures for SBBFs</i>                                                                                                                                    | S5  |
| <i>Computational details</i>                                                                                                                                             | S10 |
| <i>Additional schemes, Figures, and table</i>                                                                                                                            | S11 |
| <i>References for ESI</i>                                                                                                                                                | S39 |
| <i>Appendix I: Spectral copies of <sup>1</sup>H NMR, <sup>13</sup>C NMR, and IR for obtained compounds (including HPLC data for <b>1E2A3E4A</b> and <b>1E2A4E6A</b>)</i> | S42 |
| <i>Appendix II: Crystal data for <b>1E2E4A</b></i>                                                                                                                       | S85 |
| <i>Appendix III: Cartesian coordinates for the optimized structures (<b>1E4A</b>, <b>1E2A4E5A</b>, <b>1E2E3A</b>, and <b>1E2E4A</b>)</i>                                 | S92 |

## **General methods and materials**

All chemicals in this study were purchased from chemical company. All commercial reagents and solvents were directly used without additional purification. evaporation and removal of organic solvents during the synthesis was carried out using a rotary evaporator with a diaphragm pump, and residual solvents were removed on a vacuum line held at 0.1–1 torr. TLC (thin layer chromatography) was performed on pre-coated plate with silica gel 60 F254. Visualization on TLC was achieved using UV light (254 nm). For the separation of organic compounds, the flash column chromatography was performed on silica gel (400–630 mesh) with proper organic eluents. Proton nuclear magnetic resonance spectra (<sup>1</sup>H NMR) were recorded on Bruker AVANCE 400 (400 MHz) and 500 (500 MHz). <sup>13</sup>C NMR was recorded on Bruker AVANCE 400 (100 MHz) and 500 (125 MHz) and was fully decoupled by broad band decoupling. Infrared (IR) spectra were recorded on Bruker Alpha FT-IR spectrometer. HPLC were recorded on Waters ACQUOTY ultra performance lc system with UV detector. UV–Vis absorption and photoluminescence (PL) spectra were obtained using Agilent Cary 8454 and HORIBA FluoroMax Plus spectrophotometers, respectively. The PL spectra of the solutions were measured using quartz cuvettes with a path length of 1 cm in oxygen-free solvents (20 μM in toluene, THF and MeCN). The absolute PLQYs of the solutions were measured using a FluoroMax Plus spectrophotometer (HORIBA) equipped with a 3.2-inch integrating sphere (FL-QM-sphere, HORIBA). The fluorescence decay lifetime was measured using a FluoroMax Plus spectrophotometer equipped with a DeltaTime TCSPC accessory. The data collection for single crystal structure analysis was performed on a Bruker D8 QUEST diffractometer equipped with I $\mu$ s 3.0 Mo x-ray tube ( $\lambda = 0.71073\text{\AA}$ ) and Photon II detector. The selected crystal was coated with Parabar oil for mounting on goniometer under a stream of N<sub>2</sub> (g) at 220 K. The diffraction data were integrated, scaled, and reduced by using the Bruker APEX4 software. The crystal structure was solved by SHELX structure solution program and refined by full-matrix least-squares calculations with the SHELXL.

## **General procedures for nitration, reduction, acetylation, deacetylation and esterification**

### **General procedure for nitration (Method A-1, A-2, A-3 and A-4):**

**Method A-1<sup>S1</sup>:** SBBF (5 mmol) was dissolved in conc. sulfuric acid (5 mL), and the mixture was stirred at 0 °C. Then 60% nitric acid (0.5 mL, 6.5 mmol) was slowly added to the cooled mixture solution, and the solution was continuously stirred for 2 h at 0 °C. The reaction was quenched by addition of ice, and solid were formed. The mixture was extracted with ethyl acetate (EA), organic layer was dried by treatment with MgSO<sub>4</sub>. The organic solvents were removed under reduced pressure, and the crude reaction mixture was purified by chromatography on silica gel using *n*-hexane/EA as the eluent to obtain the desired product.

**Method A-2<sup>S1</sup>:** SBBF (1 mmol) were dissolved in Ac<sub>2</sub>O (5 mL). To mixture solution was added 60% nitric acid (1 mL) at 0 °C and stirred at room temperature for 24 h. Once conversion was complete (monitored by TLC), the solution was poured into H<sub>2</sub>O (20 mL). Saturated NaHCO<sub>3</sub> solution was added to the mixture until neutral by pH paper. The organic phase was extracted with 25 mL of EA and then the organic solution was dried with MgSO<sub>4</sub>, filtered, and evaporated. The solid mixture was separated by silica gel column chromatography and the desired compound was obtained.

**Method A-3:** SBBF (1 mmol) were dissolved in Ac<sub>2</sub>O (5 mL). To mixture solution was added 60% nitric acid (1 mL) at 0 °C and stirred at 40 °C for 24 h. Once conversion was complete (monitored by TLC), the solution was poured into H<sub>2</sub>O (20 mL). Saturated NaHCO<sub>3</sub> solution was added to the mixture until neutral by pH paper. The organic phase was extracted with 25 mL of EA and then the organic solution was dried with MgSO<sub>4</sub>, filtered, and evaporated. The solid mixture was separated by silica gel column chromatography and the desired compound was obtained.

**Method A-4:** SBBF (5 mmol) was dissolved in conc. sulfuric acid (5 mL), and the mixture was stirred at 0 °C. Then 60% nitric acid (0.5 mL, 6.5 mmol) was slowly added to the cooled mixture solution, and the solution was continuously stirred at room temperature for 4 h. The reaction was quenched by addition of ice, and solid were formed. The mixture was extracted with EA, organic layer was dried by treatment with MgSO<sub>4</sub>. The organic solvents were removed under reduced pressure, and the crude reaction mixture was purified by chromatography on silica gel using *n*-hexane/EA as the eluent to obtain the desired product.

**General procedure for reduction of nitro group (Method B)<sup>S1</sup>:** SBBF (1 mmol) was dissolved in ethanol (4 mL) and EA (1 ml), and hydrogenation was performed using 10% Pd/C (35 mg, 10 wt.%) under H<sub>2</sub> (1 atm) at 50 °C for 18 h. The resulting suspension filtered through celite with EA and ethanol and evaporated to remove volatile solvents. The solid mixture was separated by silica gel column chromatography and the desired compound, and the desired compound was obtained.

**General procedure for acetylation of Ar-NH<sub>2</sub> (Method C):** SBBF (1 mmol) was added to DCM (5 mL), followed by the addition of Et<sub>3</sub>N (0.278 mL, 2 mmol). Subsequently, acid anhydride of acid chloride was slowly added dropwise. The mixture was stirred at room temperature overnight. After the completion of the reaction, water was added to react with the remaining acid anhydride for 10 minutes. The mixture was extracted with EA, and the organic layer was dried by treatment with MgSO<sub>4</sub>. The organic solvents were removed under reduced pressure, and the crude reaction mixture was purified by chromatography on silica gel using *n*-hexane/EA as the eluent to obtain the desired acetylation product.

**General procedure for deacetylation of acetamide (or esterification) (Method D):** Acetamide SBBF (1 mmol) was added to MeOH (10 mL), followed by the slow dropwise addition of sulfuric acid (1 mL). The mixture was then allowed to react overnight at 80 °C. After the completion of the reaction, water (5 mL) was added, and neutralization was carried out using saturated NaHCO<sub>3</sub>. The mixture was extracted with EA, and the organic layer was dried by treatment with MgSO<sub>4</sub>. The organic solvents were removed under reduced pressure, and the crude reaction mixture was purified by chromatography on silica gel using *n*-hexane/EA as the eluent to obtain the desired deacetylation product.

**General procedure for oxidation of benzylic position (Method E-1 and E-2):**

**Method E-1:** Target SBBF (1 mmol) was dissolved in *t*-BuOH (5 mL), and water (5 ml) followed by the addition KMnO<sub>4</sub> (2 mmol). The mixture was stirred at 100 °C 1 h, additional KMnO<sub>4</sub> was added. After the completion of the reaction monitored by TLC, evaporation under reduced pressure to remove *t*-BuOH, and solution was acidified by 2M HCl. The solution was stored overnight in a refrigerator. The precipitate was collected by filtration and washed with water. The desired compound was obtained by air drying.

**Method E-2<sup>S2</sup>:** Target SBBF (1 mmol) was dissolved in water (10 ml) followed by the addition KMnO<sub>4</sub> (6 mmol) and MgSO<sub>4</sub> (6 mmol). The mixture was stirred at 90 °C for 24h. After the completion of the reaction monitored by TLC, the resulting brown solution was filtered using hot water. After cooling to room temperature, and solution was acidified by 2M HCl. The solution was stored overnight in a refrigerator. The precipitate was collected by filtration and washed with water. The desired compound was obtained by air drying.

**General procedure for methylation of carboxylic acid (Method F):** Target SBBF (1 mmol) was dissolved in DMF (15 mL), followed by the addition MeI (2.7 mmol) and NaHCO<sub>3</sub> (3.5 mmol). The mixture was stirred at 60 °C for 24 h. After the completion of the reaction, the mixture was extracted with EA, and the organic layer was dried by treatment with MgSO<sub>4</sub>. The organic solvents were removed under reduced pressure and using with DCM (5 mL) and *n*-hexane (50 mL) for recrystallized overnight in a refrigerator. The precipitate was collected by filtration and washed with Hexane. The desired compound was obtained by air drying.

## Synthetic Procedures for SBBFs

The obtained substrates, **1E2A3A**,<sup>S3</sup> **1E3A4A**,<sup>S3</sup> **1E3A4A**,<sup>S4</sup> **1E3A5A**,<sup>S5</sup> **1E2E4A**,<sup>S6</sup> **1E2E4A5A**,<sup>S7</sup> **1E2A4A5E**,<sup>S8</sup> **1E2A3A4E**,<sup>S1</sup> and **1E2A4E5A**<sup>S9</sup> were identified with reported spectra in the literature.

**Methyl 2,3-diaminobenzoate (1E2A3A), methyl 2,5-diaminobenzoate (1E2A5A) and methyl 3,4-diaminobenzoate (1E3A4A)**: The compound **1E2A3A**, **1E2A5A** and **1E3A4A** was synthesized through a four-step process. First, methyl 3-amino-benzoate (**1E3A**) (10 mmol) reacted follow method C using AcCl (1.1 equiv.) without additional purification and following reaction using method A-2 The nitrated compound was reduction with method B without additional purification. Finally, reaction using Method D, the crude reaction mixture was purified by chromatography on silica gel using *n*-hexane/EA as the eluent.

**Methyl 2,3-diaminobenzoate (1E2A3A)**<sup>S3</sup>: White solid; overall yield 14%; <sup>1</sup>H NMR (500 MHz, DMSO-*d*<sub>6</sub>) δ 7.10 (dd, *J* = 8.1, 1.5 Hz, 1H), 6.70 (dd, *J* = 7.5, 1.5 Hz, 1H), 6.39 (dd, *J* = 8.1, 7.5 Hz, 1H), 6.20 (s, 2H), 4.76 (s, 2H), 3.76 (s, 3H); <sup>13</sup>C{<sup>1</sup>H} NMR (126 MHz, DMSO-*d*<sub>6</sub>) δ 168.7, 139.6, 135.9, 118.7, 117.3, 115.3, 108.9, 51.3; IR (cm<sup>-1</sup>) 3448, 3426, 3365, 3077, 2947, 1879, 1690, 1639, 1610, 1558, 1468, 1432, 1282.

**Methyl 2,5-diaminobenzoate (1E2A5A)**<sup>S10</sup>: White solid; overall yield 25%; <sup>1</sup>H NMR (500 MHz, DMSO-*d*<sub>6</sub>) δ 6.99 (d, *J* = 2.8 Hz, 1H), 6.69 (dd, *J* = 8.7, 2.7 Hz, 1H), 6.56 (d, *J* = 8.7 Hz, 1H), 5.86 (s, 2H), 4.41 (s, 2H), 3.75 (s, 3H); <sup>13</sup>C{<sup>1</sup>H} NMR (126 MHz, DMSO-*d*<sub>6</sub>) δ 168.0, 143.2, 137.8, 123.4, 117.7, 113.8, 109.3, 51.2; IR (cm<sup>-1</sup>) 3448, 3418, 3397, 3350, 3264, 3032, 2957, 1679, 1633, 1592, 1566, 1497, 1435.

**Methyl 3,4-diaminobenzoate (1E3A4A)**<sup>S3</sup>: White solid; overall yield 3%; <sup>1</sup>H NMR (500 MHz, DMSO-*d*<sub>6</sub>) δ 7.16 (d, *J* = 2.0 Hz, 1H), 7.09 (dd, *J* = 8.1, 2.0 Hz, 1H), 6.51 (d, *J* = 8.1 Hz, 1H), 5.28 (s, 2H), 4.66 (s, 2H), 3.71 (s, 3H); <sup>13</sup>C{<sup>1</sup>H} NMR (126 MHz, DMSO-*d*<sub>6</sub>) δ 166.8, 140.5, 133.8, 120.2, 117.1, 114.8, 112.6, 51.0; IR (cm<sup>-1</sup>) 3434, 3361, 3195, 2923, 2851, 1688, 1662, 1625, 1584, 1511, 1449, 1426.

**Methyl 2,4-diaminobenzoate (1E2A4A)**<sup>S11</sup>: The compound **1E2A4A** was synthesized through a two-step process. First, 2-amino-4-nitrobenzoic acid (10 mmol) reacted follow method D without additional purification and following reaction using Method B, the crude reaction mixture was purified by chromatography on silica gel using *n*-hexane/EA as the eluent. The desired white product was obtained in overall yield 20%; <sup>1</sup>H NMR (500 MHz, DMSO-*d*<sub>6</sub>) δ 7.39 (d, *J* = 8.5 Hz, 1H), 6.40 (s, 2H), 5.82 (dd, *J* = 8.5, 2.2 Hz, 1H) 5.79 (d, *J* = 2.2 Hz, 1H), 5.61 (s, 2H), 3.66 (s, 3H); <sup>13</sup>C{<sup>1</sup>H} NMR (126 MHz, DMSO-*d*<sub>6</sub>) δ 167.6, 153.9, 153.1, 132.0, 104.0, 98.4, 97.3, 50.5; IR (cm<sup>-1</sup>) 3423, 3333, 3231, 2942, 1650, 1622, 1579, 1549, 1509, 1450.

**Methyl 2,6-diaminobenzoate (1E2A6A)**<sup>S12</sup>: Compound **1E2A6A** was synthesized through

two-steps was 2,6-diaminobenzoic acid reacted follow method D, ester was synthesized without purification. And next reduction follows method B, and crude reaction mixture was purified by chromatography on silica gel using *n*-hexane/EA as the eluent. The desired product was obtained as a brown solid in yield 80%; <sup>1</sup>H NMR (400 MHz, DMSO-*d*<sub>6</sub>) δ 6.80 (t, *J* = 8.0 Hz, 1H), 6.19 (s, 4H), 5.85 (d, *J* = 8.0 Hz, 2H), 3.78 (s, 3H); <sup>13</sup>C{<sup>1</sup>H} NMR (101 MHz, DMSO-*d*<sub>6</sub>) δ 169.6, 152.6, 134.2, 103.2, 96.4, 51.6; IR (cm<sup>-1</sup>) 3479, 3365, 2924, 2852, 1677, 1582, 1463, 1433, 1350.

**Methyl 3,5-diaminobenzoate (1E3A5A)**<sup>S4</sup>: Compound **1E3A5A** was synthesized through method D. 3,5-diaminobenzoic acid reacted follow method D; Yellow solid; yield 80%; <sup>1</sup>H NMR (500 MHz, DMSO-*d*<sub>6</sub>) δ 6.43 (d, *J* = 2.1 Hz, 2H), 6.02 (t, *J* = 2.1 Hz, 1H), 4.99 (s, 4H), 3.74 (s, 3H); <sup>13</sup>C{<sup>1</sup>H} NMR (126 MHz, DMSO-D6) δ 167.27, 149.38, 130.54, 103.67, 103.64, 51.53; IR (cm<sup>-1</sup>) 3381, 3308, 3212, 3021, 2946, 2842, 1703, 1598, 1463, 1434, 1352, 1293.

**Dimethyl 3-aminophthalate (1E2E3A)**<sup>S5</sup>: Compound **1E2E3A** was synthesized through a two-step process. First, Dimethyl 3-Nitrophthalic acid (10 mmol) reacted follow method F without additional purification. And reduction using method B, the crude reaction mixture was purified by chromatography on silica gel using *n*-hexane/EA as the eluent. The desired product was obtained as a yellow oil in overall yield 25%; <sup>1</sup>H NMR (500 MHz, DMSO-*d*<sub>6</sub>) δ 7.24 (dd, *J* = 8.4, 7.3 Hz, 1H), 6.92 (dd, *J* = 8.4, 1.2 Hz, 1H), 6.75 (dd, *J* = 7.3, 1.1 Hz, 1H), 6.09 (s, 2H), 3.75 (s, 3H), 3.74 (s, 3H); <sup>13</sup>C{<sup>1</sup>H} NMR (126 MHz, DMSO-*d*<sub>6</sub>) δ 168.6, 167.6, 148.8, 133.6, 131.8, 119.1, 115.6, 111.0, 52.3; IR (cm<sup>-1</sup>) 3479, 3376, 2951, 1702, 1608, 1462, 1432, 1311.

**Dimethyl 4-aminophthalate (1E2E4A)**<sup>S6</sup>: Compound **1E2E4A** was synthesized through a two-step process. First, Dimethyl phthalate (10 mmol) reacted follow method A-1 without additional purification. And reduction using method B, the crude reaction mixture was purified by chromatography on silica gel using *n*-hexane/EA as the eluent. The desired product was obtained as white solid in overall yield 25%; <sup>1</sup>H NMR (500 MHz, DMSO-*d*<sub>6</sub>) δ 7.57 (d, *J* = 8.5 Hz, 1H), 6.63 (dd, *J* = 8.5, 2.4 Hz, 1H), 6.59 (d, *J* = 2.4 Hz, 1H), 6.16 (s, 2H), 3.75 (s, 3H), 3.70 (s, 3H); <sup>13</sup>C{<sup>1</sup>H} NMR (126 MHz DMSO-*d*<sub>6</sub>) δ 169.4, 165.9, 152.7, 136.5, 131.5, 113.9, 113.6, 111.8, 52.2, 51.6; IR (cm<sup>-1</sup>) 3438, 3354, 3246, 2949, 1727, 1692, 1648, 1598, 1563, 1433, 1345.

**Dimethyl 2-aminoisophthalate (1E2A3E)** and **Dimethyl 4-aminoisophthalate (1E2A5E)**: **1E2A3E** and **1E2A5E** compounds were synthesized through a four-step process. First, *m*-xylene (10 mmol) reacted according to method A-2. The mono-nitrated *m*-xylene was oxidized with method E without additional purification and esterified with method D. Finally, after reduction using method B, the crude reaction mixture was purified by chromatography on silica gel using *n*-hexane/EA as the eluent.

**Dimethyl 2-aminoisophthalate (1E2A3E)**<sup>S13</sup>: Yellow solid; overall yield 7%; <sup>1</sup>H NMR (400 MHz, DMSO-*d*<sub>6</sub>) δ 8.04 (d, *J* = 7.8 Hz, 2H), 8.01 (s, 2H), 6.63 (t, *J* = 7.8 Hz, 1H), 3.82 (s, 6H); <sup>13</sup>C{<sup>1</sup>H} NMR (101 MHz, DMSO) δ 167.4, 152.1, 137.2, 113.8, 111.2, 51.9; IR (cm<sup>-1</sup>) 3446, 3335, 2958, 2851, 1691, 1605, 1572, 1464, 1435, 1381.

**Dimethyl 4-aminoisophthalate (1E2A5E)**<sup>S14</sup>: Yellow solid; overall yield 4%; <sup>1</sup>H NMR (400 MHz, DMSO-*d*<sub>6</sub>) δ 8.37 (d, *J* = 2.1 Hz, 1H), 7.77 (dd, *J* = 8.8, 2.2 Hz, 1H), 7.35 (s, 2H), 6.83 (d, *J* = 8.9 Hz, 1H), 3.82 (s, 3H), 3.77 (s, 3H); <sup>13</sup>C{<sup>1</sup>H} NMR (101 MHz, DMSO-*d*<sub>6</sub>) δ 167.2, 165.6, 154.6, 134.2, 133.5, 116.4, 115.5, 108.0, 51.7, 51.5; IR (cm<sup>-1</sup>) 3448, 3341, 2950, 1684, 1617, 1595, 1561, 1456, 1433, 1361, 1327.

**Dimethyl 3,4-diaminophthalate (1E2E3A4A)**: Compound **1E2E3A4A** was synthesized through a five-step process. First, 3-amino-*o*-xylene (10 mmol) reacted followed method C, reacted follow method A-1 without additional purification. And following reaction using method E-2. The oxidation compound was esterification using method D without additional purification. The crude reaction mixture was purified by chromatography on silica gel using *n*-hexane/EA as the eluent to dimethyl 3-amino, 4-nitrophthalate was separated. Finally, after reduction using method B, the crude reaction mixture was purified by chromatography on silica gel using *n*-hexane/EA as the eluent. The desired product was obtained as an orange solid in overall yield 4%; <sup>1</sup>H NMR (500 MHz, DMSO-*d*<sub>6</sub>) δ 6.98 (d, *J* = 8.2 Hz, 1H), 6.56 (d, *J* = 8.2 Hz, 1H), 5.56 (s, 2H), 4.88 (s, 2H), 3.68 (s, 6H); <sup>13</sup>C{<sup>1</sup>H} NMR (126 MHz, DMSO-*d*<sub>6</sub>) δ 169.1, 166.9, 140.5, 132.4, 120.1, 116.9, 116.6, 112.5, 52.0, 51.6; IR (cm<sup>-1</sup>) 3364, 2950, 1696, 1617, 1587, 1493, 1453, 1432.

**Dimethyl 3,5-diaminophthalate (1E2E3A5A)**: Compound **1E2E3A5A** was synthesized through a four-step process. First 3-nitro phthalic acid (10 mmol) reacted followed method F, following reaction using method B. The Reduction compound was nitration with method A-4 without additional purification. The crude reaction mixture was purified by chromatography on silica gel using *n*-hexane/EA as the eluent to dimethyl 3-Amino,5-nitrophthalate was separated. Finally, after reduction using method B, the crude reaction mixture was purified by chromatography on silica gel using *n*-hexane/EA as the eluent. The desired product was obtained as a brown oil, in overall yield 9%; <sup>1</sup>H NMR (500 MHz, CDCl<sub>3</sub>) δ 6.08 (d, *J* = 2.1 Hz, 1H), 5.93 (d, *J* = 2.1 Hz, 1H), 4.68 (s, 4H), 3.81 (s, 3H), 3.75 (s, 3H); <sup>13</sup>C{<sup>1</sup>H} NMR (126 MHz, CDCl<sub>3</sub>) δ 170.4, 167.3, 151.3, 149.8, 138.0, 105.6, 101.3, 100.6, 52.2, 51.5; IR (cm<sup>-1</sup>) 3485, 3470, 3364, 2948, 1692, 1600, 1455, 1430, 1397, 1346; HR-MS (ESI) : Calculated for C<sub>10</sub>H<sub>12</sub>N<sub>2</sub>O<sub>4</sub> [M+Na]<sup>+</sup>: 247.0689, found: 247.0689.

**Dimethyl 3,6-diaminophthalate (1E2E3A6A)**: Compound **1E2E3A6A** was synthesized through a six-step process. First 3-nitro phthalic acid (10 mmol) reacted followed Method F, without additional purification and following reaction using method B. The crude reaction mixture was purified by chromatography on silica gel using *n*-hexane/EA as the eluent to dimethyl 3-aminophthalate was separated. The Reduction compound was Acetylation with

method C without additional purification and following nitration with method A-3. The crude reaction mixture was purified by chromatography on silica gel using *n*-hexane/EA as the eluent to dimethyl 3-acetamino, 6-nitrophthalate was separated. The nitrated compound was esterification with method D without additional purification. Finally, reduction using Method B, the crude reaction mixture was purified by chromatography on silica gel using *n*-hexane/EA as the eluent. The desired product was obtained as a yellow solid in overall yield 7%; <sup>1</sup>H NMR (500 MHz, DMSO-*d*<sub>6</sub>) δ 6.77 (s, 2H), 5.21 (s, 4H), 3.70 (s, 6H); <sup>13</sup>C{<sup>1</sup>H} NMR (126 MHz, DMSO-*d*<sub>6</sub>) δ 168.3, 139.4, 122.3, 111.6, 51.8; IR (cm<sup>-1</sup>) 3470, 3445, 3361, 2922, 2851, 2105, 1692, 1602, 1480, 1444, 1312; HR-MS (ESI) : Calculated for C<sub>10</sub>H<sub>12</sub>N<sub>2</sub>O<sub>4</sub> [M+Na]<sup>+</sup>: 247.0689, found: 247.0689.

**Dimethyl 4,5-diaminophthalate (1E2E4A5A)**<sup>S7</sup>: Compound **1E2E3A4A** was synthesized through a five-step process. First 4-amino-*o*-xylene (10 mmol) reacted followed Method C, without additional purification and reacted follow method A-1 without additional purification. And following reaction using method E-1. The oxidation compound was esterification with method D without additional purification. The crude reaction mixture was purified by chromatography on silica gel using *n*-hexane/EA as the eluent to dimethyl 4-amino-5-nitrophthalate was separated. Finally, reduction using Method B, the crude reaction mixture was purified by chromatography on silica gel using *n*-hexane/EA as the eluent. The desired product was obtained as an orange solid in overall yield 10%; <sup>1</sup>H NMR (500 MHz, DMSO-*d*<sub>6</sub>) δ 6.80 (s, 2H), 5.22 (s, 4H), 3.69 (s, 6H); <sup>13</sup>C{<sup>1</sup>H} NMR (126 MHz, DMSO-*d*<sub>6</sub>) δ 168.2, 137.0, 120.6, 113.5, 51.7; IR (cm<sup>-1</sup>) 3415, 3359, 3299, 2948, 1715, 1688, 1625, 1574, 1520, 1437, 1372, 1327.

**Dimethyl 2,4-diaminoisophthalate (1E2A3E4A)**: Compound **1E2A3E4A** was synthesized through a four-step process. First, methyl 3-methyl benzoate (5 mmol) reacted follow method A-1, di-nitrated compound was synthesized, purified by chromatography on silica gel using *n*-hexane/EA as the eluent to methyl 3-methyl-2,6-dinitrobenzoate was separated. The nitrated compound was oxidation with method E-1 without additional purification and following esterification with method D. Finally, reduction using Method B, the crude reaction mixture was purified by chromatography on silica gel using *n*-hexane/EA as the eluent. The desired product was obtained as a white solid in overall yield 2%; <sup>1</sup>H NMR (400 MHz, DMSO-*d*<sub>6</sub>) δ 8.27 (s, 2H), 7.59 (d, *J* = 9.0 Hz, 1H), 7.16 (s, 2H), 5.95 (d, *J* = 9.1 Hz, 1H), 3.81 (s, 3H), 3.69 (s, 3H); <sup>13</sup>C{<sup>1</sup>H} NMR (101 MHz, DMSO-*d*<sub>6</sub>) δ 168.6, 167.7, 156.5, 155.5, 135.8, 104.0, 96.7, 93.4, 51.4, 50.8; IR (cm<sup>-1</sup>) 3502, 3434, 3368, 2950, 2922, 2851, 1679, 1572, 1534, 1491, 1433, 1383, 1345; HR-MS (ESI) : Calculated for C<sub>10</sub>H<sub>12</sub>N<sub>2</sub>O<sub>4</sub> [M+H]<sup>+</sup>: 225.0870, found: 225.0872.

**Dimethyl 2,5-diaminoisophthalate (1E2A3E5A) and Dimethyl 4,5-diaminoisophthalate (1E2A3A5E)**: Compound **1E2A3E5A** and **1E2A3A5E** was synthesized through a four-step process. First, dimethyl 5-amino-isophthalate (**1E3E5A**) (10 mmol) reacted follow method C using AcCl (1.1 equiv.) without additional purification



and following reaction using method A-2 The nitrated compound was reduction with method B without additional purification. Finally, reaction using Method D, the crude reaction mixture was purified by chromatography on silica gel using *n*-hexane/EA as the eluent.

**Dimethyl 2,5-diaminoisophthalate (1E2A3E5A):** Yellow solid; overall yield 16%; <sup>1</sup>H NMR (400 MHz, DMSO-*d*<sub>6</sub>) δ 7.46 (s, 2H), 7.34 (broad, 2H), 4.75 (s, 2H), 3.79 (s, 6H); <sup>13</sup>C{<sup>1</sup>H} NMR (101 MHz, DMSO-*d*<sub>6</sub>) δ 167.5, 144.9, 136.7, 123.2, 111.6, 51.7; IR (cm<sup>-1</sup>) 3458, 3396, 3350, 3001, 2950, 1693, 1661, 1574, 1548, 1432; HR-MS (ESI) : Calculated for C<sub>10</sub>H<sub>12</sub>N<sub>2</sub>O<sub>4</sub> [M+Na]<sup>+</sup>: 247.0689, found: 247.0689.

**Dimethyl 4,5-diaminoisophthalate (1E2A3A5E):** White solid; overall yield 51%; <sup>1</sup>H NMR (400 MHz, DMSO-*d*<sub>6</sub>) δ 7.85 (d, *J* = 2.0 Hz, 1H), 7.27 (d, *J* = 2.0 Hz, 1H), 6.89 (s, 2H), 5.08 (s, 2H), 3.81 (s, 3H), 3.75 (s, 3H); <sup>13</sup>C{<sup>1</sup>H} NMR (101 MHz, DMSO-*d*<sub>6</sub>) δ 168.1, 166.2, 143.5, 135.7, 121.9, 115.9, 115.8, 107.5, 51.6, 51.4; IR (cm<sup>-1</sup>) 3442, 3397, 3342, 2951, 1680, 1621, 1572, 1483, 1437, 1333, 1307; HR-MS (ESI) : Calculated for C<sub>10</sub>H<sub>12</sub>N<sub>2</sub>O<sub>4</sub> [M+Na]<sup>+</sup>: 247.0689, found: 247.0689.

**Dimethyl 4,6-diaminoisophthalate (1E2A4A5E)**<sup>S8</sup>: Compound **1E2A4A5E** was synthesized through a three-step process. First, *m*-xylene (10 mmol) reacted follow method A-1. The nitrated compound was oxidation with method E-1 without additional purification and following esterification with method D. Finally, reaction using Method B, the crude reaction mixture was purified by chromatography on silica gel using *n*-hexane/EA as the eluent. The desired product was obtained as a white solid in yield 6%; <sup>1</sup>H NMR (500 MHz, DMSO-*d*<sub>6</sub>) δ 8.33 (s, 1H), 6.92 (s, 4H), 5.91 (s, 1H), 3.74 (s, 6H); <sup>13</sup>C{<sup>1</sup>H} NMR (126 MHz, DMSO-*d*<sub>6</sub>) δ 167.0, 154.6, 136.9, 100.3, 97.2, 51.0; IR (cm<sup>-1</sup>) 3430, 3318, 2953, 1672, 1629, 1586, 1543, 1434, 1307.

**Dimethyl 2,3-diaminoterephthalate (1E2A3A4E)**<sup>S1</sup>: Compound **1E2A3A4E** was synthesized through a four-step process. First, dimethyl 2-amino-terephthalate (**1E2A4E**) (2 mmol) reacted follow method C using AcCl (1.1 equiv.) without additional purification and following reaction using method A-1. The nitrated compound was reduction with method B without additional purification. Finally, reaction using Method D, the crude reaction mixture was purified by chromatography on silica gel using *n*-hexane/EA as the eluent. The desired product was obtained as a yellow solid in overall yield 2%; <sup>1</sup>H NMR (500 MHz, DMSO-*d*<sub>6</sub>) δ 7.02 (s, 2H), 6.70 (s, 4H), 3.80 (s, 6H); <sup>13</sup>C{<sup>1</sup>H} NMR (126 MHz, DMSO-*d*<sub>6</sub>) δ 168.2, 140.6, 115.6, 109.8, 51.7, 39.5; IR (cm<sup>-1</sup>) 3441, 3366, 3013, 2957, 2921, 2849, 1689, 1624, 1605, 1532, 1433, 1312.

**Dimethyl 2,5-diaminoterephthalate (1E2A4E5A)**<sup>S1</sup>: Dimethyl 1,4-cyclohexanedione-2,5-dicarboxylate (1 g, 4.3 mmol) was dissolved in 50 mL acetic acid solution, followed by the addition of phenyl hydrazine (1 mL, 1.01 mmol). The mixture was stirred at room temperature under atmospheric conditions for 2 hours. Subsequently, water (50 mL) was

added, and the mixture was neutralized with a saturated  $K_2CO_3$  solution. The mixture was extracted with EA, organic layer was dried by treatment with  $MgSO_4$ . The organic solvents were removed under reduced pressure, and the crude reaction mixture was purified by chromatography on silica gel using *n*-hexane/EA as the eluent. The desired product was obtained as a yellow solid in yield 32%;  $^1H$  NMR (500 MHz,  $CDCl_3$ )  $\delta$  7.27 (s, 2H), 5.07 (s, 2H), 3.86 (s, 6H);  $^{13}C\{^1H\}$  NMR (126 MHz,  $CDCl_3$ )  $\delta$  167.7, 140.7, 119.0, 117.6, 52.0; IR ( $cm^{-1}$ ) 3467, 3365, 2954, 1679, 1573, 1502.

**Dimethyl 2,6-diaminoterephthalate (1E2A4E6A):** Compound **1E2A4E6A** was synthesized through a two-step process. First, Dimethyl 2-amino-terephthalate (**1E2A4E**) (2 mmol) reacted follow method A-1. The nitrated compound was reduction with method B, the crude reaction mixture was purified by chromatography on silica gel using *n*-hexane/EA as the eluent. The desired product was obtained as a brown solid in overall yield 1.5%;  $^1H$  NMR (500 MHz,  $DMSO-d_6$ )  $\delta$  6.47 (s, 2H), 6.43 (broad, 2H), 3.80 - 3.77 (m, 6H);  $^{13}C\{^1H\}$  NMR (126 MHz,  $DMSO-d_6$ )  $\delta$  169.0, 166.9, 152.4, 134.0, 103.3, 102.8, 98.5, 52.4, 51.8, 40.5; IR ( $cm^{-1}$ ) 3508, 3373, 2918, 2849, 1716, 1669, 1583, 1477, 1439, 1385, 1319; HR-MS (ESI) : Calculated for  $C_{10}H_{12}N_2O_4$   $[M+H]^+$ : 225.0870, found: 225.0872.

### Computational details

All calculations were conducted using the Gaussian 09 package.<sup>S15</sup> Ground state calculation DFT/cam-B3LYP, 6-31g(d) level of theory and excited state calculations doing TD-DFT/cam-B3LYP, 6-31g(d) level of theory. The cam-B3LYP functional was used to achieve improved accuracy for molecules exhibiting electronic transitions with charge-transfer characteristics.<sup>S16</sup>

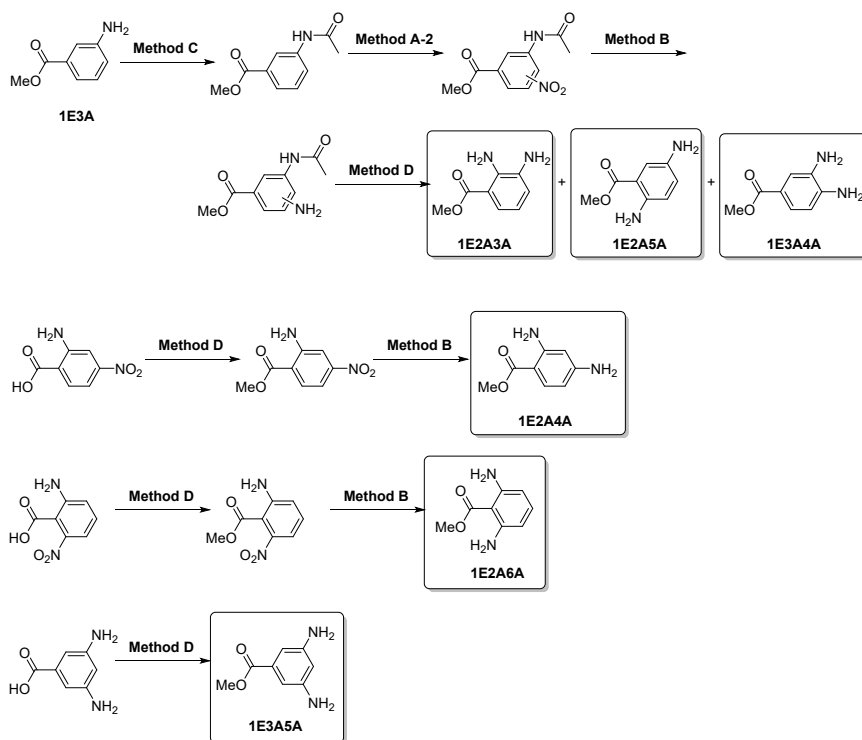

**Scheme S1.** Synthetic scheme for **1E2A3A**, **1E2A4A**, **1E2A5A**, **1E2A4A**, **1E2A6A**, and **1E3A5A**.

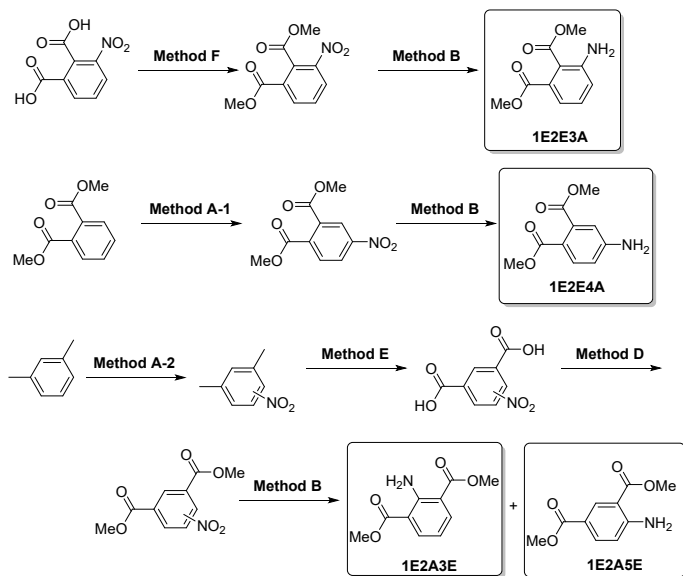

**Scheme S2.** Synthetic scheme for **1E2E3A**, **1E2E4A**, **1E2A3E**, and **1E2A5E**.

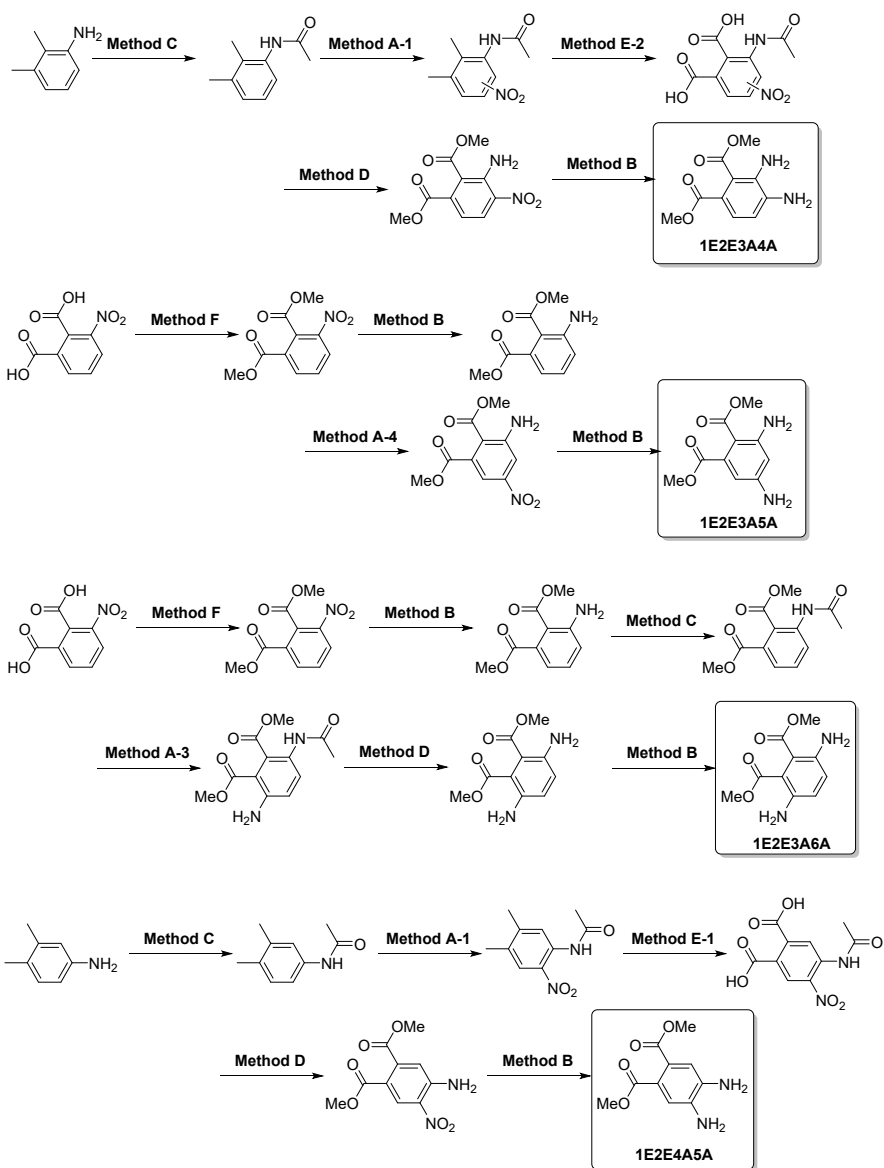

**Scheme S3.** Synthetic scheme for **1E2E3A4A**, **1E2E3A5A**, **1E2E3A6A**, and **1E2E4A5A**.

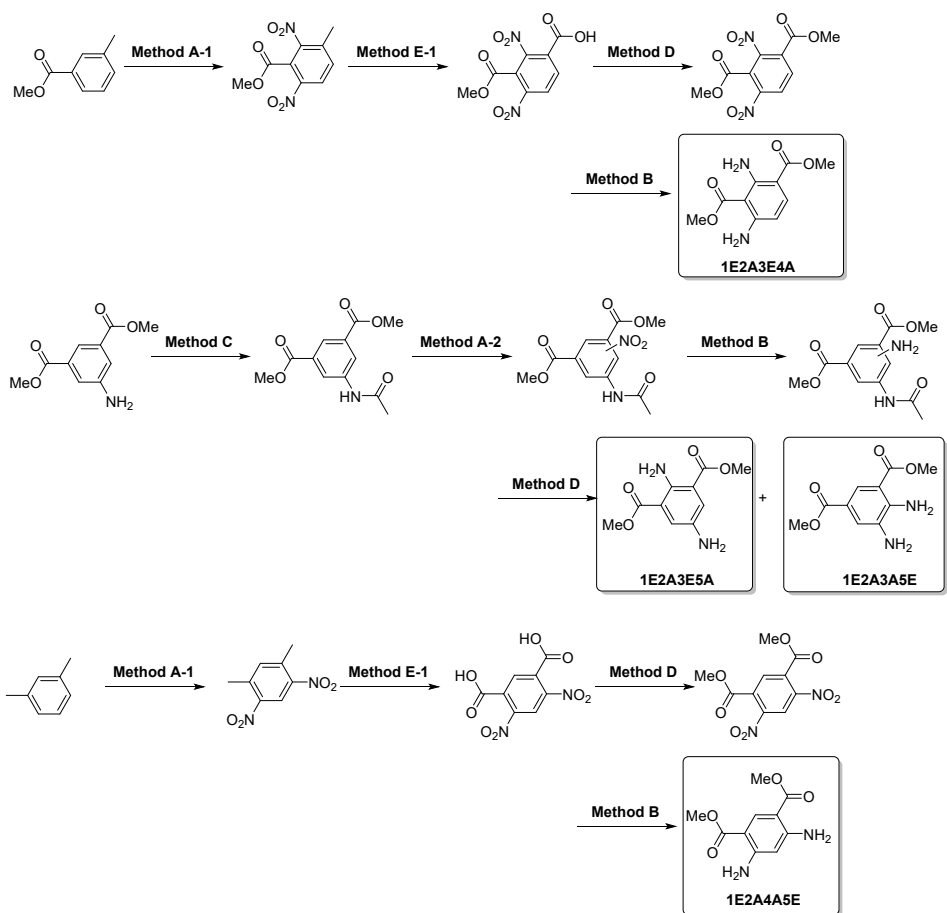

**Scheme S4.** Synthetic scheme for **1E2A3E4A**, **1E2A3E5A**, **1E2A3A5E**, and **1E2A4A5E**.

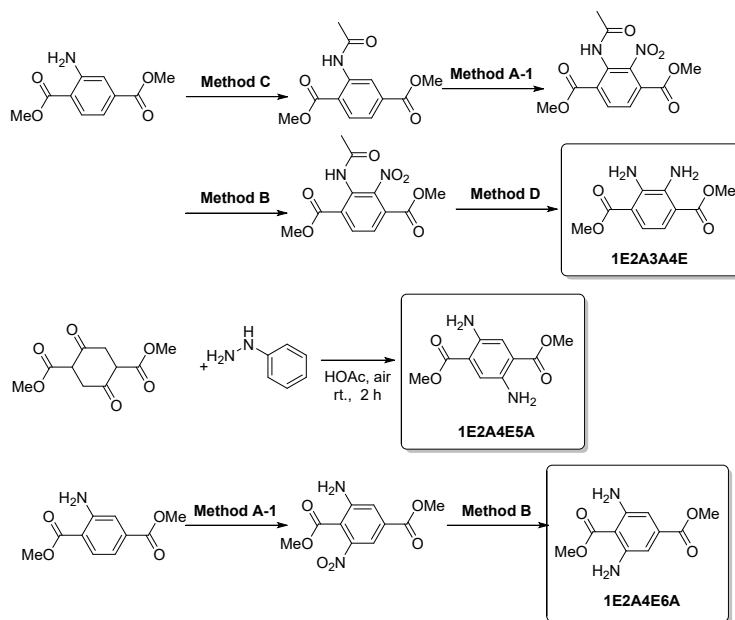

**Scheme S5.** Synthetic scheme for **1E2A3A4E**, **1E2A4E5A** and **1E2A4E6A**.

**Table S1** Photophysical data of mono-amino & mono-ester and di-amino & mono-ester SBBFs in toluene, THF and MeCN.

| Compound                           | Solvent | $\lambda_{\text{abs}}$ [nm]<br>( $\epsilon \times 10^{-3} \text{ M}^{-1} \text{ cm}^{-1}$ ) | $\lambda_{\text{ex}}$ [nm] | $\lambda_{\text{em}}$ [nm] | Stokes shift<br>[ $\text{cm}^{-1}$ ] | $\phi_{\text{PL}}$<br>[%] <sup>a</sup> | $\tau$<br>[ns] <sup>b</sup> | $K_r$<br>[ $\times 10^7 \text{ s}^{-1}$ ] | $K_{nr}$<br>[ $\times 10^8 \text{ s}^{-1}$ ] |
|------------------------------------|---------|---------------------------------------------------------------------------------------------|----------------------------|----------------------------|--------------------------------------|----------------------------------------|-----------------------------|-------------------------------------------|----------------------------------------------|
| <b>Mono-amino &amp; mono-ester</b> |         |                                                                                             |                            |                            |                                      |                                        |                             |                                           |                                              |
| <b>1E2A</b>                        | Tol     | 336 (6.91)                                                                                  | 335                        | 388                        | 4078                                 | 48                                     | 6.29                        | 7.65                                      | 0.82                                         |
|                                    | THF     | 339 (8.75)                                                                                  | 337                        | 392                        | 4163                                 | 59                                     | 7.20                        | 8.16                                      | 0.57                                         |
|                                    | MeCN    | 335 (5.45)                                                                                  | 334                        | 395                        | 4624                                 | 60                                     | 7.26                        | 8.22                                      | 0.55                                         |
| <b>1E3A</b>                        | Tol     | 321 (6.32)                                                                                  | 321                        | 373                        | 4343                                 | 31                                     | 0.54                        | 57.54                                     | 12.76                                        |
|                                    | THF     | 322 (5.06)                                                                                  | 326                        | 390                        | 5034                                 | 51                                     | 9.90                        | 5.19                                      | 0.49                                         |
|                                    | MeCN    | 323 (3.99)                                                                                  | 322                        | 395                        | 5739                                 | 42                                     | 12.22                       | 3.41                                      | 0.48                                         |
| <b>1E4A</b>                        | Tol     | 286 (50.21)                                                                                 | 294                        | 322                        | 2958                                 | 62                                     | 0.65                        | 95.55                                     | 5.83                                         |
|                                    | THF     | 288 (28.32)                                                                                 | 285                        | 328                        | 4600                                 | N.A.                                   | 0.63                        | N.A.                                      | N.A.                                         |
|                                    | MeCN    | 285 (24.40)                                                                                 | 283                        | 329                        | 4941                                 | N.A.                                   | 3.45                        | N.A.                                      | N.A.                                         |
| <b>Di-amino &amp; mono-ester</b>   |         |                                                                                             |                            |                            |                                      |                                        |                             |                                           |                                              |
| <b>1E2A3A</b>                      | Tol     | 346 (6.82)                                                                                  | 344                        | 429                        | 5760                                 | 55                                     | 8.18                        | 6.70                                      | 0.55                                         |
|                                    | THF     | 352 (6.89)                                                                                  | 352                        | 442                        | 5785                                 | 47                                     | 9.43                        | 4.93                                      | 0.57                                         |
|                                    | MeCN    | 348 (6.22)                                                                                  | 348                        | 450                        | 6513                                 | 33                                     | 8.00                        | 4.08                                      | 0.84                                         |
| <b>1E2A4A</b>                      | Tol     | 322 (6.07)                                                                                  | 321                        | 367                        | 3905                                 | 19                                     | 0.62                        | 29.89                                     | 13.14                                        |
|                                    | THF     | 321 (10.01)                                                                                 | 322                        | 369                        | 3956                                 | 14                                     | 0.63                        | 21.49                                     | 13.72                                        |
|                                    | MeCN    | 320 (9.72)                                                                                  | 321                        | 372                        | 4271                                 | 16                                     | 0.67                        | 23.19                                     | 12.61                                        |
| <b>1E2A5A</b>                      | Tol     | 375 (2.58)                                                                                  | 376                        | 465                        | 5090                                 | 47                                     | 9.51                        | 4.97                                      | 0.55                                         |
|                                    | THF     | 386 (5.66)                                                                                  | 385                        | 480                        | 5141                                 | 43                                     | 11.14                       | 3.87                                      | 0.51                                         |
|                                    | MeCN    | 379 (5.25)                                                                                  | 379                        | 483                        | 5681                                 | 54                                     | 10.26                       | 5.28                                      | 0.45                                         |
| <b>1E2A6A</b>                      | Tol     | 358 (12.59)                                                                                 | 356                        | 414                        | 3935                                 | 42                                     | 7.07                        | 6.00                                      | 0.81                                         |
|                                    | THF     | 371 (3.30)                                                                                  | 365                        | 427                        | 3978                                 | 32                                     | 6.89                        | 4.61                                      | 0.99                                         |
|                                    | MeCN    | 368 (2.68)                                                                                  | 370                        | 445                        | 4555                                 | 6                                      | 11.97                       | 0.51                                      | 0.78                                         |
| <b>1E3A4A</b>                      | Tol     | 308 (18.19)                                                                                 | 313                        | 368                        | 4775                                 | 28                                     | 0.62                        | 44.71                                     | 11.66                                        |
|                                    | THF     | 308 (18.19)                                                                                 | 319                        | 383                        | 5238                                 | 50                                     | 0.57                        | 88.35                                     | 8.71                                         |
|                                    | MeCN    | 316 (9.40)                                                                                  | 317                        | 390                        | 5905                                 | 53                                     | 0.40                        | 131.38                                    | 11.86                                        |
| <b>1E3A5A</b>                      | Tol     | 336 (2.99)                                                                                  | 336                        | 390                        | 4121                                 | 11                                     | 2.94                        | 3.60                                      | 3.04                                         |
|                                    | THF     | 343 (5.03)                                                                                  | 343                        | 404                        | 4402                                 | 12                                     | 3.73                        | 3.13                                      | 2.37                                         |
|                                    | MeCN    | 341 (4.65)                                                                                  | 340                        | 411                        | 5081                                 | 19                                     | 4.06                        | 4.74                                      | 1.99                                         |

<sup>a</sup> Absolute photoluminescence quantum yield (PLQY). <sup>b</sup> Emission lifetime.

**Table S2** Photophysical data of mono-amino & di-ester SBBFs in toluene, THF and MeCN.

| Compound                         | Solvent | $\lambda_{\text{abs}}$ [nm]<br>( $\epsilon \times 10^{-3} \text{ M}^{-1} \text{ cm}^{-1}$ ) | $\lambda_{\text{ex}}$ [nm] | $\lambda_{\text{em}}$ [nm] | Stokes shift<br>[ $\text{cm}^{-1}$ ] | $\phi_{\text{PL}}$<br>[%] <sup>a</sup> | T<br>[ns] <sup>b</sup> | $K_r$<br>[ $\times 10^7 \text{ s}^{-1}$ ] | $K_{\text{nr}}$<br>[ $\times 10^8 \text{ s}^{-1}$ ] |
|----------------------------------|---------|---------------------------------------------------------------------------------------------|----------------------------|----------------------------|--------------------------------------|----------------------------------------|------------------------|-------------------------------------------|-----------------------------------------------------|
| <b>Mono-amino &amp; di-ester</b> |         |                                                                                             |                            |                            |                                      |                                        |                        |                                           |                                                     |
| <b>1E2E3A</b>                    | Tol     | 340 (4.66)                                                                                  | 339                        | 426                        | 6024                                 | 39                                     | 7.63                   | 5.16                                      | 0.79                                                |
|                                  | THF     | 343 (5.71)                                                                                  | 341                        | 435                        | 6337                                 | 53                                     | 9.54                   | 5.54                                      | 0.49                                                |
|                                  | MeCN    | 341 (6.14)                                                                                  | 337                        | 435                        | 6685                                 | 66                                     | 9.40                   | 6.98                                      | 0.37                                                |
| <b>1E2E4A</b>                    | Tol     | 285 (15.33)                                                                                 | 300                        | 400                        | 8333                                 | 66                                     | 0.74                   | 88.69                                     | 4.64                                                |
|                                  | THF     | 283 (19.63)                                                                                 | 283                        | 412                        | 11064                                | N.A.                                   | 3.34                   | N.A.                                      | N.A.                                                |
|                                  | MeCN    | 282 (19.63)                                                                                 | 279                        | 417                        | 11861                                | N.A.                                   | 0.63                   | N.A.                                      | N.A.                                                |
| <b>1E2A3E</b>                    | Tol     | 373 (10.36)                                                                                 | 366                        | 407                        | 2752                                 | 53                                     | 6.08                   | 8.65                                      | 0.78                                                |
|                                  | THF     | 369 (9.02)                                                                                  | 364                        | 405                        | 2781                                 | 34                                     | 6.26                   | 5.41                                      | 1.06                                                |
|                                  | MeCN    | 363 (7.09)                                                                                  | 362                        | 406                        | 2994                                 | 50                                     | 6.27                   | 7.94                                      | 0.80                                                |
| <b>1E2A5E</b>                    | Tol     | 331 (5.88)                                                                                  | 329                        | 378                        | 3940                                 | 32                                     | 0.58                   | 55.69                                     | 11.67                                               |
|                                  | THF     | 332 (7.50)                                                                                  | 333                        | 383                        | 3920                                 | 28                                     | 0.43                   | 66.21                                     | 16.63                                               |
|                                  | MeCN    | 331 (6.19)                                                                                  | 330                        | 383                        | 4193                                 | 23                                     | 0.47                   | 48.13                                     | 16.46                                               |
| <b>1E3E5A</b>                    | Tol     | 337 (6.54)                                                                                  | 337                        | 384                        | 3632                                 | 9                                      | 2.33                   | 3.69                                      | 3.92                                                |
|                                  | THF     | 337 (3.87)                                                                                  | 346                        | 402                        | 4026                                 | 13                                     | 3.69                   | 3.44                                      | 2.37                                                |
|                                  | MeCN    | 340 (7.38)                                                                                  | 340                        | 401                        | 4474                                 | 14                                     | 3.59                   | 3.97                                      | 2.39                                                |
| <b>1E2A4E</b>                    | Tol     | 366 (7.00)                                                                                  | 363                        | 420                        | 3739                                 | 64                                     | 10.19                  | 6.29                                      | 0.35                                                |
|                                  | THF     | 371 (6.36)                                                                                  | 368                        | 425                        | 3645                                 | 50                                     | 11.33                  | 4.38                                      | 0.44                                                |
|                                  | MeCN    | 365 (6.91)                                                                                  | 363                        | 428                        | 4184                                 | 58                                     | 14.58                  | 3.98                                      | 0.29                                                |

<sup>a</sup> Absolute photoluminescence quantum yield (PLQY). <sup>b</sup> Emission lifetime.



**Table S3** Photophysical data of di-amino & di-ester SBBFs in toluene, THF and MeCN.

| Compound                       | Solvent | $\lambda_{\text{abs}}$ [nm]<br>( $\epsilon \times 10^{-3} \text{ M}^{-1} \text{ cm}^{-1}$ ) | $\lambda_{\text{ex}}$ [nm] | $\lambda_{\text{em}}$ [nm] | Stokes shift<br>[ $\text{cm}^{-1}$ ] | $\phi_{\text{PL}}$<br>[%] <sup>a</sup> | $\tau$<br>[ns] <sup>b</sup> | $K_{\text{f}}$<br>[ $\times 10^7 \text{ s}^{-1}$ ] | $K_{\text{nr}}$<br>[ $\times 10^8 \text{ s}^{-1}$ ] |
|--------------------------------|---------|---------------------------------------------------------------------------------------------|----------------------------|----------------------------|--------------------------------------|----------------------------------------|-----------------------------|----------------------------------------------------|-----------------------------------------------------|
| <b>Di-amino &amp; di-ester</b> |         |                                                                                             |                            |                            |                                      |                                        |                             |                                                    |                                                     |
| <b>1E2E3A4A</b>                | Tol     | 324 (14.06)                                                                                 | 332                        | 452                        | 7997                                 | 23                                     | 4.43                        | 5.29                                               | 1.73                                                |
|                                | THF     | 333 (8.37)                                                                                  | 338                        | 457                        | 7704                                 | 31                                     | 4.75                        | 6.50                                               | 1.45                                                |
|                                | MeCN    | 329 (13.18)                                                                                 | 331                        | 461                        | 8520                                 | 21                                     | 4.16                        | 4.94                                               | 1.91                                                |
| <b>1E2E3A5A</b>                | Tol     | 329 (9.11)                                                                                  | 331                        | 429                        | 6901                                 | 6                                      | 0.86                        | 7.38                                               | 10.89                                               |
|                                | THF     | 330 (6.55)                                                                                  | 332                        | 439                        | 7341                                 | 4                                      | 0.85                        | 4.78                                               | 11.29                                               |
|                                | MeCN    | 330 (8.54)                                                                                  | 340                        | 440                        | 6684                                 | 1                                      | 0.82                        | 1.52                                               | 12.04                                               |
| <b>1E2E3A6A</b>                | Tol     | 391 (4.31)                                                                                  | 392                        | 498                        | 5430                                 | 39                                     | 8.50                        | 4.58                                               | 0.72                                                |
|                                | THF     | 398 (7.42)                                                                                  | 400                        | 503                        | 5119                                 | 38                                     | 9.04                        | 4.22                                               | 0.68                                                |
|                                | MeCN    | 391 (6.73)                                                                                  | 391                        | 499                        | 5535                                 | 34                                     | 9.02                        | 3.79                                               | 0.73                                                |
| <b>1E2E4A5A</b>                | Tol     | 310 (10.3)                                                                                  | 308                        | 396                        | 7215                                 | 34                                     | 0.48                        | 70.00                                              | 13.88                                               |
|                                | THF     | 291 (14.26)                                                                                 | 316                        | 422                        | 7949                                 | 28                                     | 0.59                        | 46.78                                              | 12.27                                               |
|                                | MeCN    | 316 (9.85)                                                                                  | 316                        | 436                        | 8710                                 | 28                                     | 3.57                        | 7.92                                               | 2.01                                                |
| <b>1E2A3E4A</b>                | Tol     | 360 (7.08)                                                                                  | 360                        | 390                        | 2137                                 | 7                                      | 2.83                        | 2.60                                               | 3.27                                                |
|                                | THF     | 358 (9.24)                                                                                  | 357                        | 389                        | 2304                                 | 24                                     | 2.74                        | 8.92                                               | 2.76                                                |
|                                | MeCN    | 356 (8.62)                                                                                  | 354                        | 394                        | 2868                                 | 25                                     | 3.31                        | 7.51                                               | 2.27                                                |
| <b>1E2A3E5A</b>                | Tol     | 423 (7.25)                                                                                  | 422                        | 494                        | 3454                                 | 45                                     | 9.67                        | 4.63                                               | 0.57                                                |
|                                | THF     | 428 (8.13)                                                                                  | 428                        | 511                        | 3795                                 | 65                                     | 11.09                       | 5.84                                               | 0.32                                                |
|                                | MeCN    | 420 (8.41)                                                                                  | 422                        | 510                        | 4089                                 | 52                                     | 10.45                       | 5.00                                               | 0.46                                                |
| <b>1E2A3A5E</b>                | Tol     | 344 (5.63)                                                                                  | 344                        | 418                        | 5146                                 | 24                                     | 3.59                        | 6.81                                               | 2.11                                                |
|                                | THF     | 351 (10.18)                                                                                 | 350                        | 431                        | 5370                                 | 21                                     | 3.78                        | 5.65                                               | 2.08                                                |
|                                | MeCN    | 347 (7.90)                                                                                  | 347                        | 436                        | 5883                                 | 17                                     | 13.05                       | 1.28                                               | 0.64                                                |
| <b>1E2A4A5E</b>                | Tol     | 331 (14.74)                                                                                 | 331                        | 357                        | 2200                                 | 0.4                                    | 0.52                        | 0.85                                               | 19.15                                               |
|                                | THF     | 333 (7.96)                                                                                  | 331                        | 362                        | 2587                                 | 0.8                                    | 0.53                        | 1.45                                               | 18.72                                               |
|                                | MeCN    | 331 (6.19)                                                                                  | 329                        | 365                        | 2998                                 | 1                                      | 3.54                        | 0.31                                               | 2.79                                                |
| <b>1E2A3A4E</b>                | Tol     | 391 (4.62)                                                                                  | 389                        | 471                        | 4476                                 | 67                                     | 10.03                       | 6.64                                               | 0.33                                                |
|                                | THF     | 399 (6.33)                                                                                  | 400                        | 476                        | 3992                                 | 63                                     | 11.04                       | 5.75                                               | 0.33                                                |
|                                | MeCN    | 392 (7.33)                                                                                  | 391                        | 478                        | 4655                                 | 47                                     | 10.77                       | 4.38                                               | 0.49                                                |
| <b>1E2A4E5A</b>                | Tol     | 443 (3.91)                                                                                  | 443                        | 539                        | 4020                                 | 53                                     | 11.36                       | 4.70                                               | 0.41                                                |
|                                | THF     | 451 (6.64)                                                                                  | 447                        | 553                        | 4288                                 | 47                                     | 11.26                       | 4.16                                               | 0.47                                                |
|                                | MeCN    | 440 (6.01)                                                                                  | 440                        | 553                        | 4644                                 | 32                                     | 10.95                       | 2.94                                               | 0.62                                                |
| <b>1E2A4E6A</b>                | Tol     | 394 (5.55)                                                                                  | 394                        | 450                        | 3158                                 | 39                                     | 9.57                        | 4.05                                               | 0.64                                                |
|                                | THF     | 392 (4.82)                                                                                  | 396                        | 453                        | 3177                                 | 35                                     | 8.12                        | 4.33                                               | 0.80                                                |
|                                | MeCN    | 387 (5.65)                                                                                  | 391                        | 455                        | 3597                                 | 19                                     | 0.38                        | 50.21                                              | 21.29                                               |

<sup>a</sup> Absolute photoluminescence quantum yield (PLQY). <sup>b</sup> Emission lifetime.

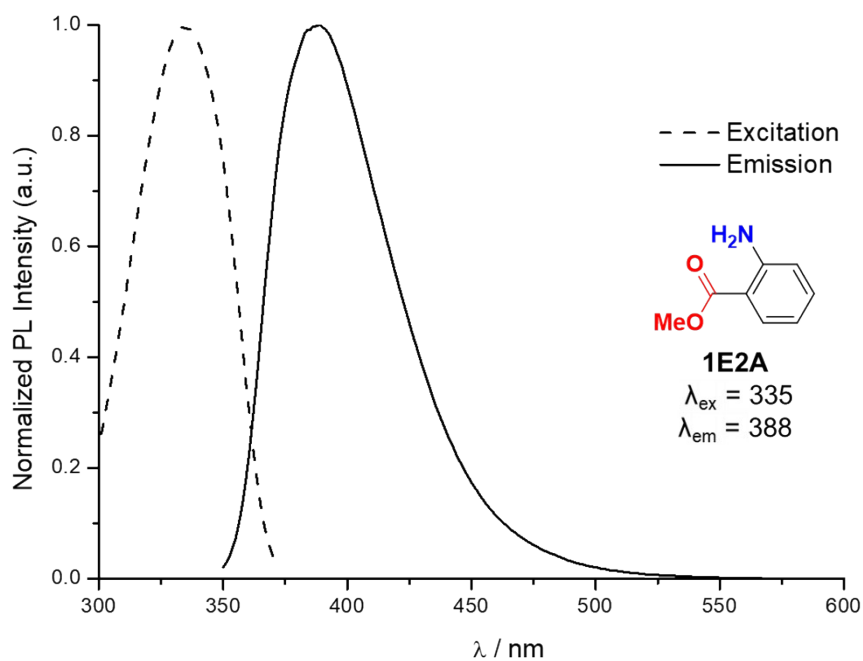

**Fig. S1** Emission and excitation spectra of **1E2A** in toluene.

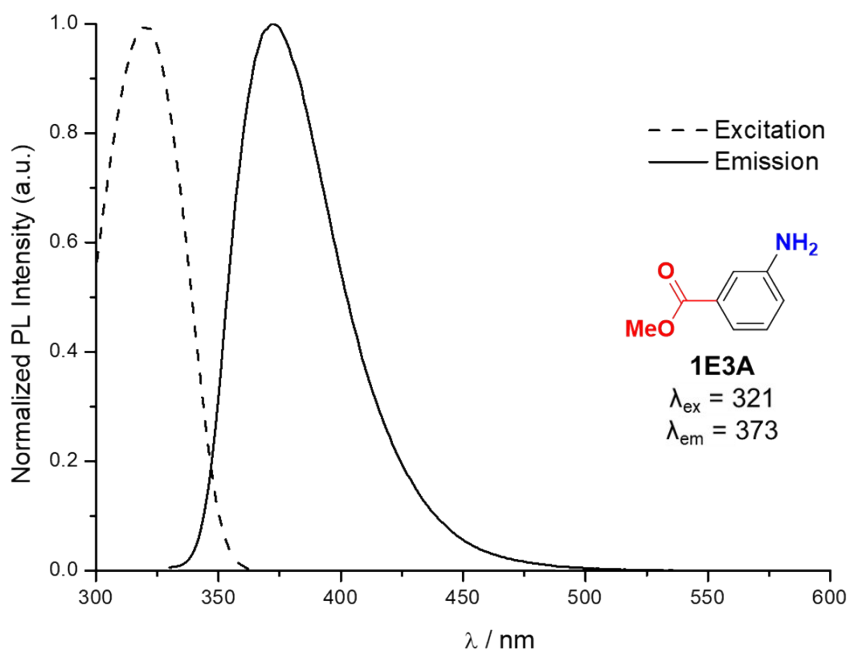

**Fig. S2** Emission and excitation spectra of **1E3A** in toluene.

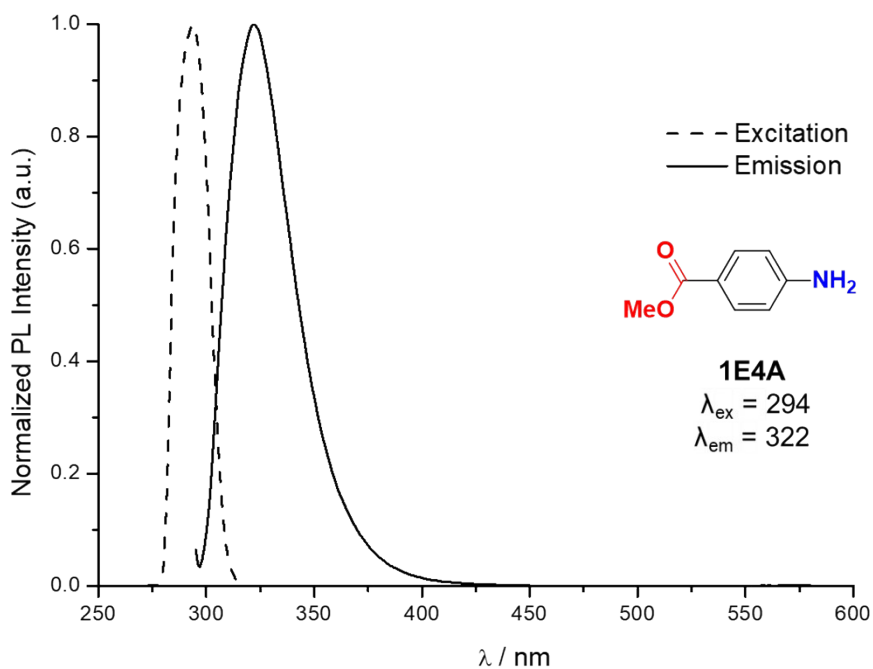

**Fig. S3** Emission and excitation spectra of **1E4A** in toluene.

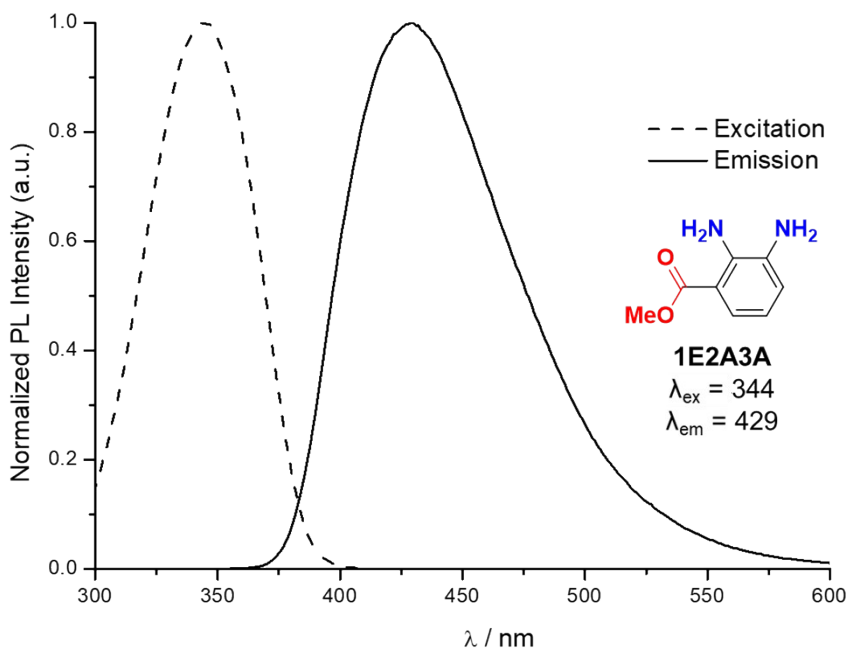

**Fig. S4** Emission and excitation spectra of **1E2A3A** in toluene.

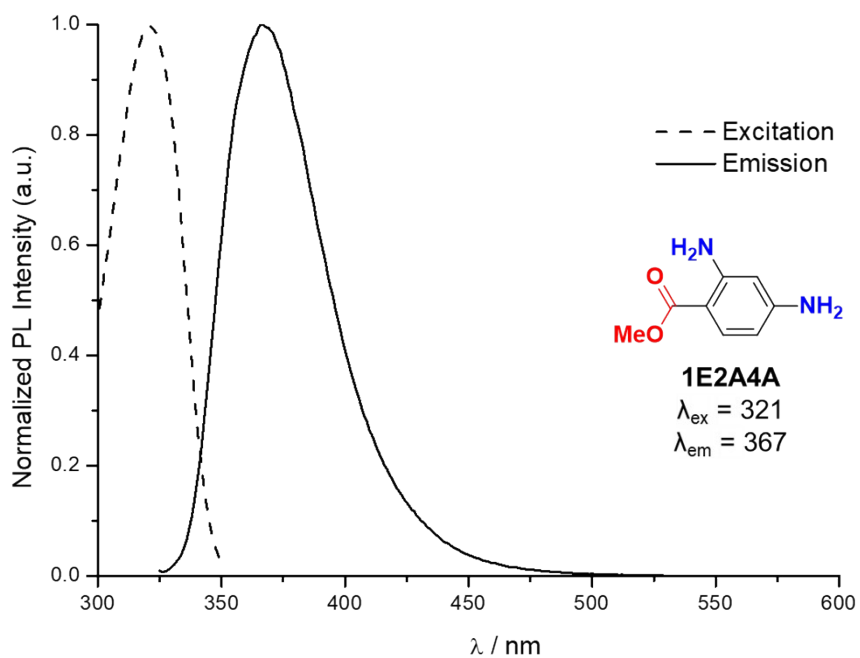

**Fig. S5** Emission and excitation spectra of **1E2A4A** in toluene.

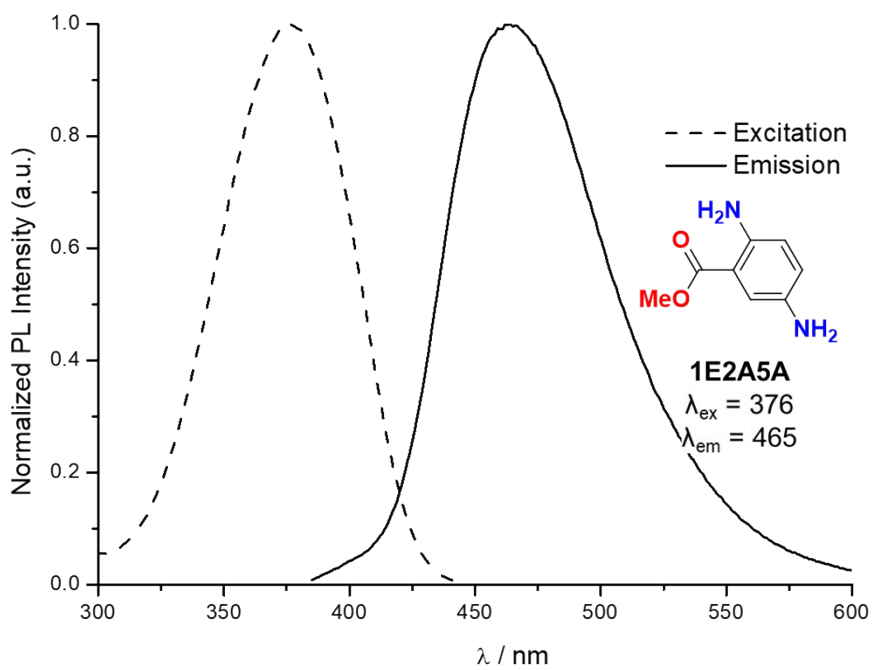

**Fig. S6** Emission and excitation spectra of **1E2A5A** in toluene.

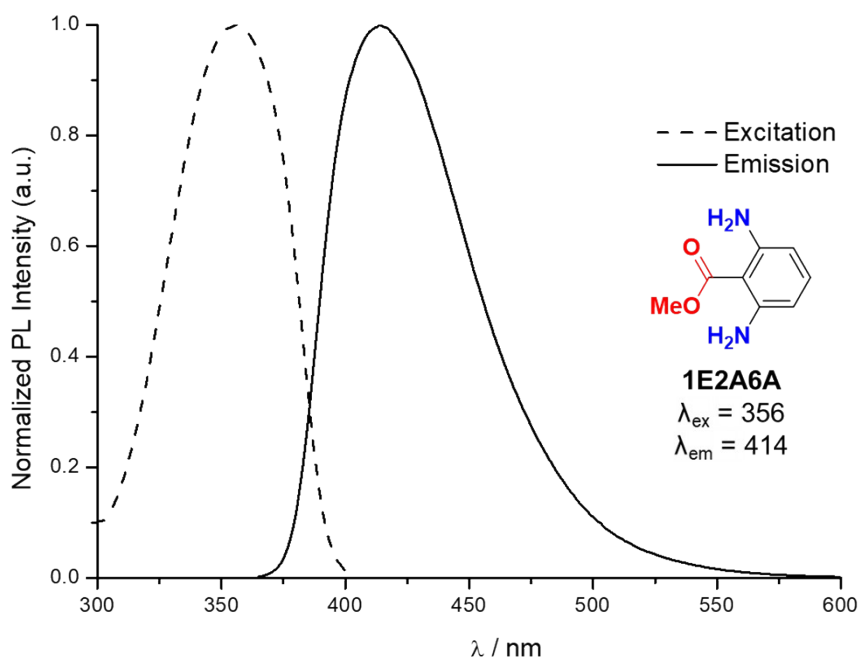

**Fig. S7** Emission and excitation spectra of **1E2A6A** in toluene.

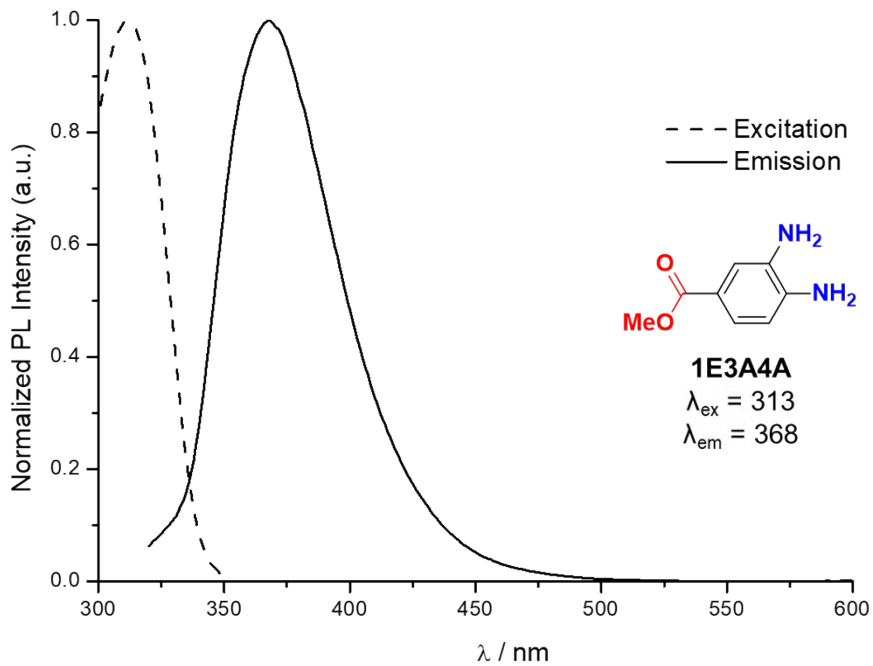

**Fig. S8** Emission and excitation spectra of **1E3A4A** in toluene.

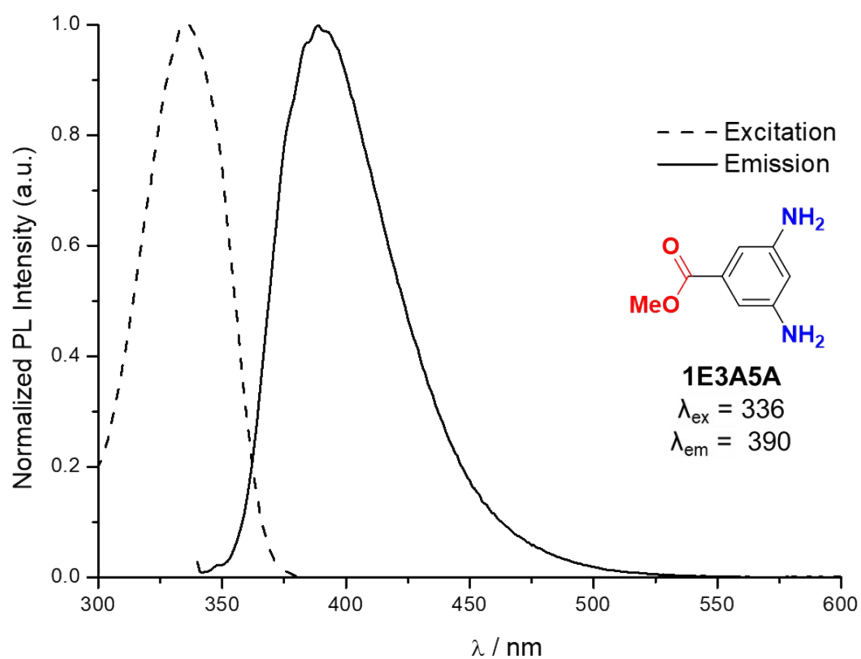

**Fig. S9** Emission and excitation spectra of **1E3A5A** in toluene.

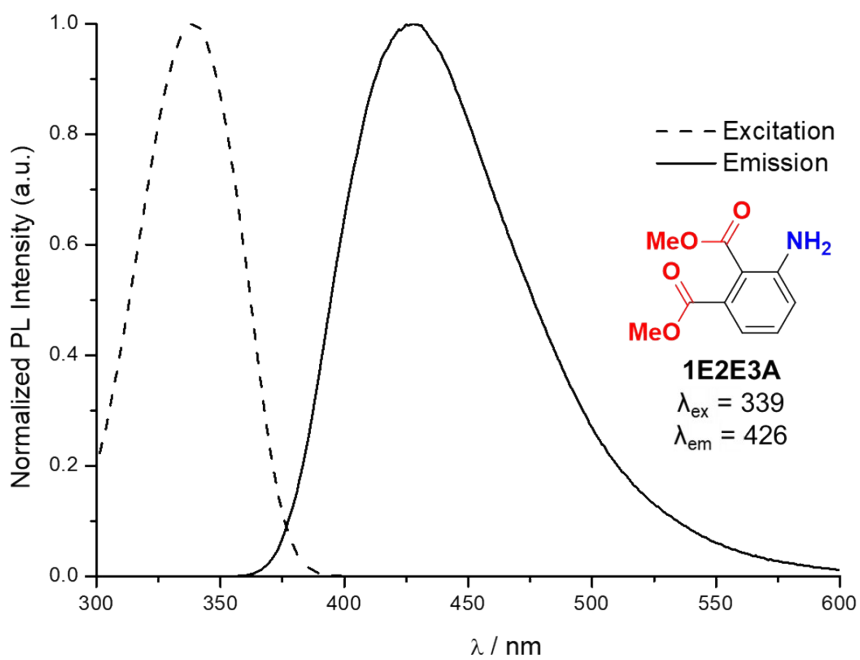

**Fig. S10** Emission and excitation spectra of **1E2E3A** in toluene.

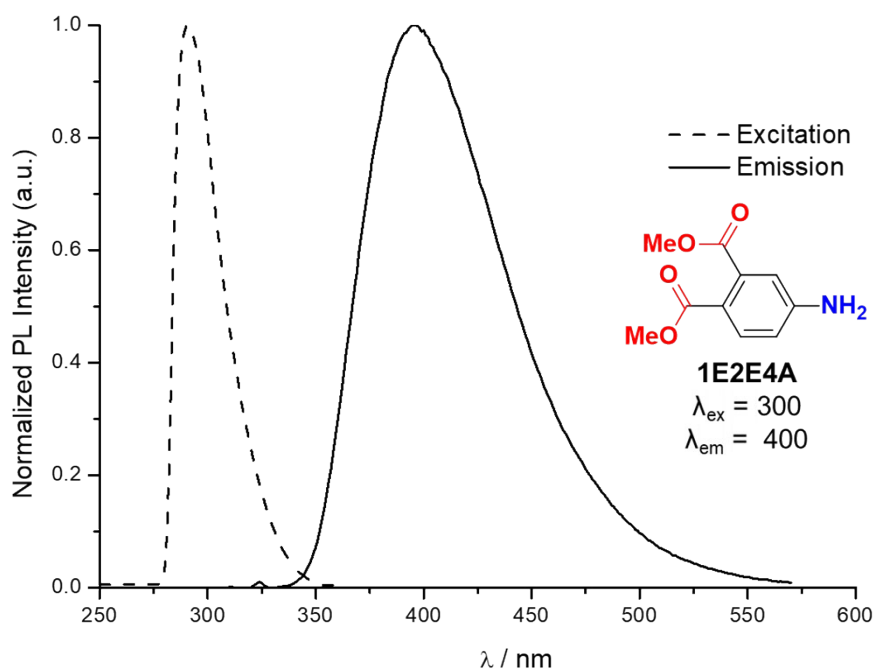

**Fig. S11** Emission and excitation spectra of **1E2E4A** in toluene.

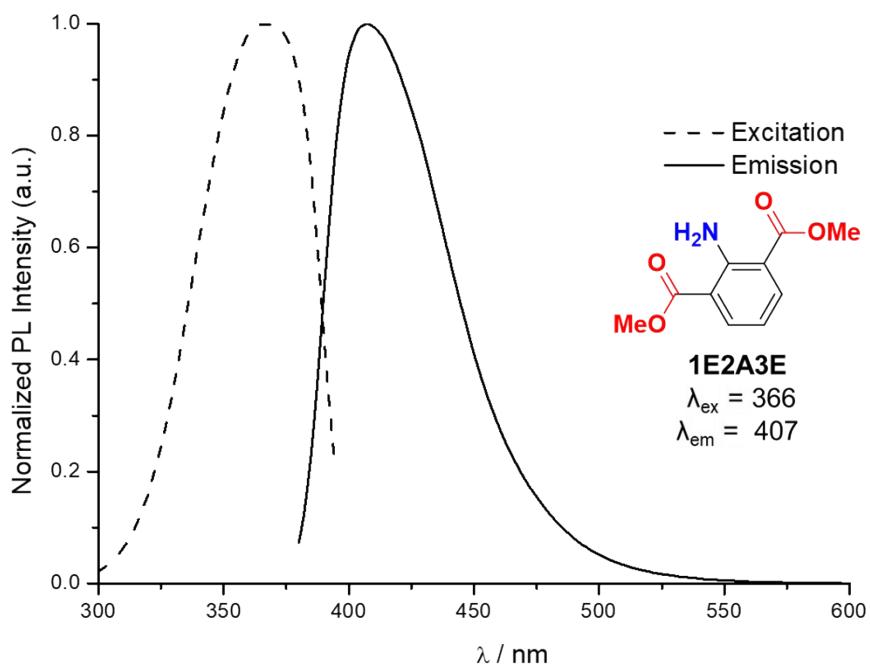

**Fig. S12** Emission and excitation spectra of **1E2A3E** in toluene.

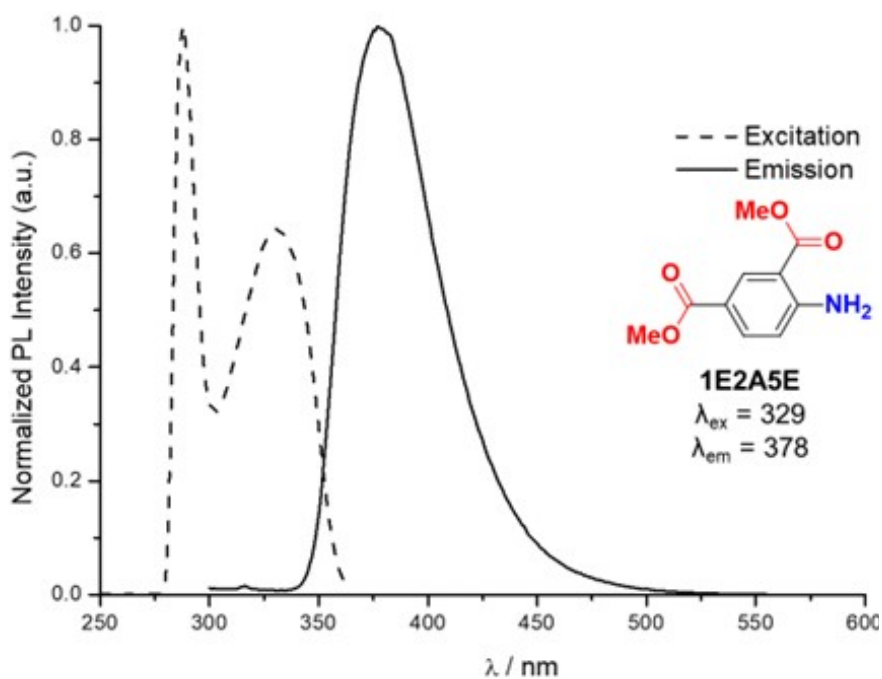

**Fig. S13** Emission and excitation spectra of **1E2A5E** in toluene.

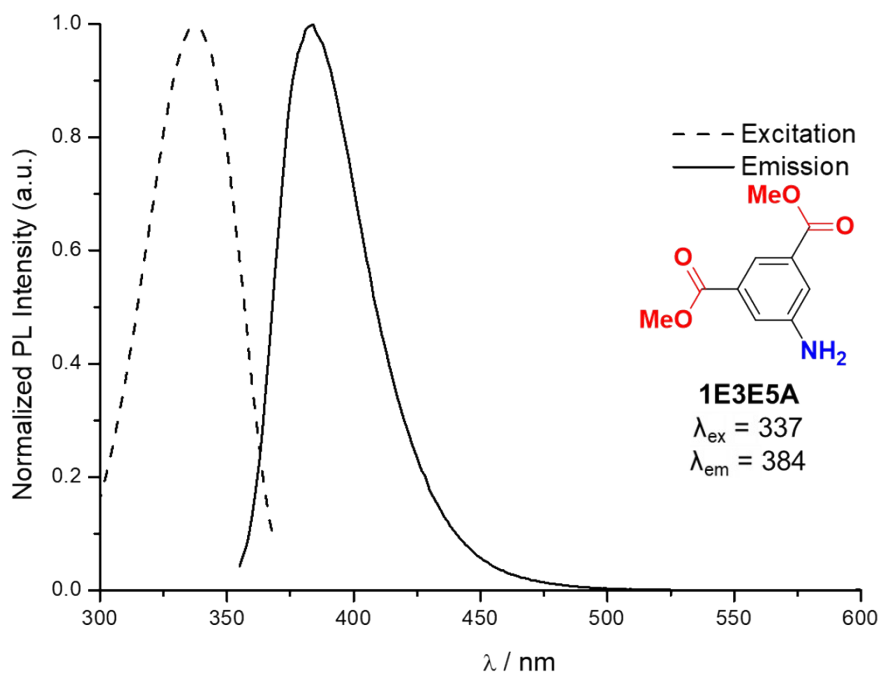

**Fig. S14** Emission and excitation spectra of **1E3E5A** in toluene.



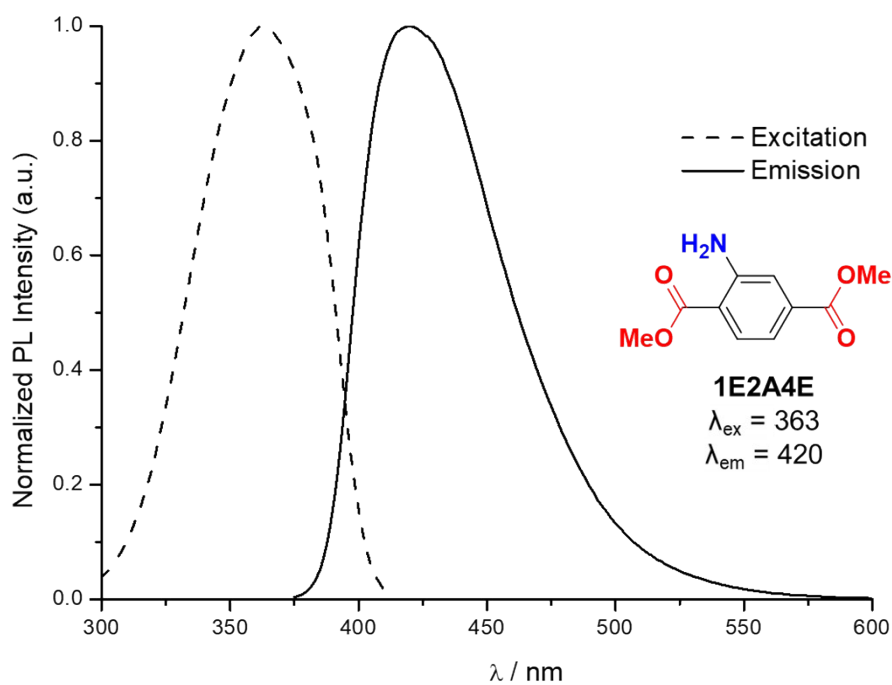

**Fig. S15** Emission and excitation spectra of **1E2A4E** in toluene.

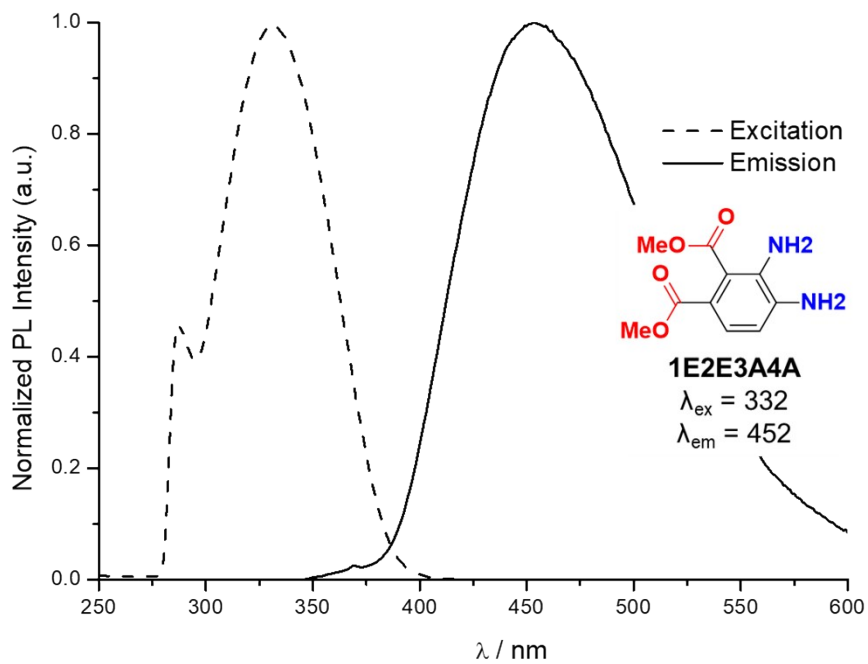

**Fig. S16** Emission and excitation spectra of **1E2E3A4A** in toluene.

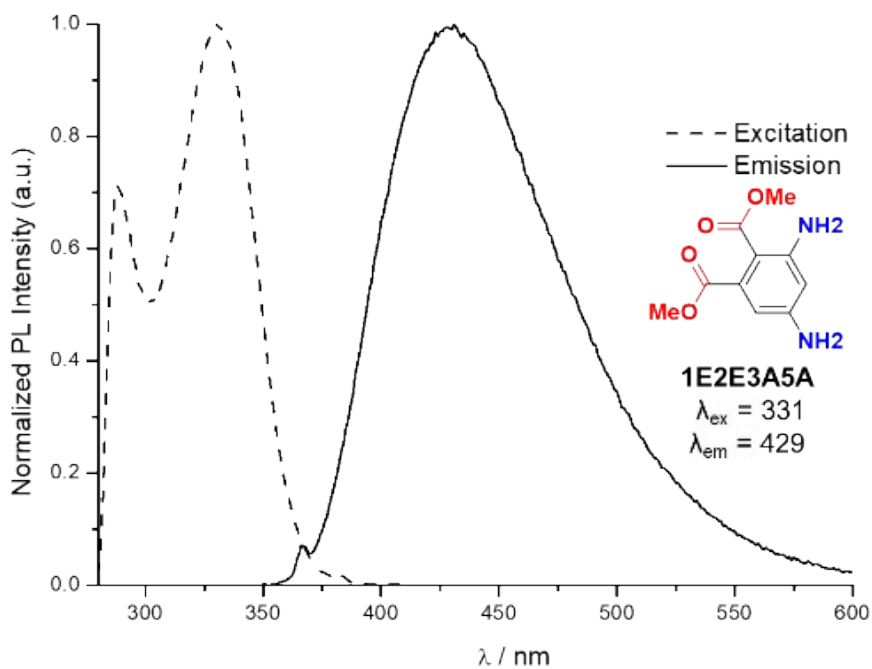

**Fig. S17** Emission and excitation spectra of **1E2E3A5A** in toluene.

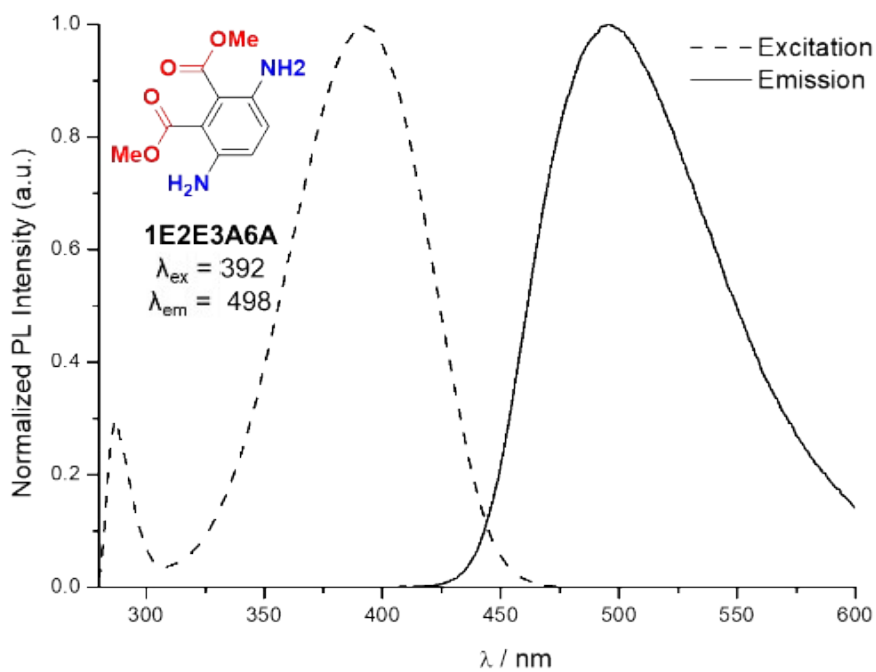

**Fig. S18** Emission and excitation spectra of **1E2E3A6A** in toluene.

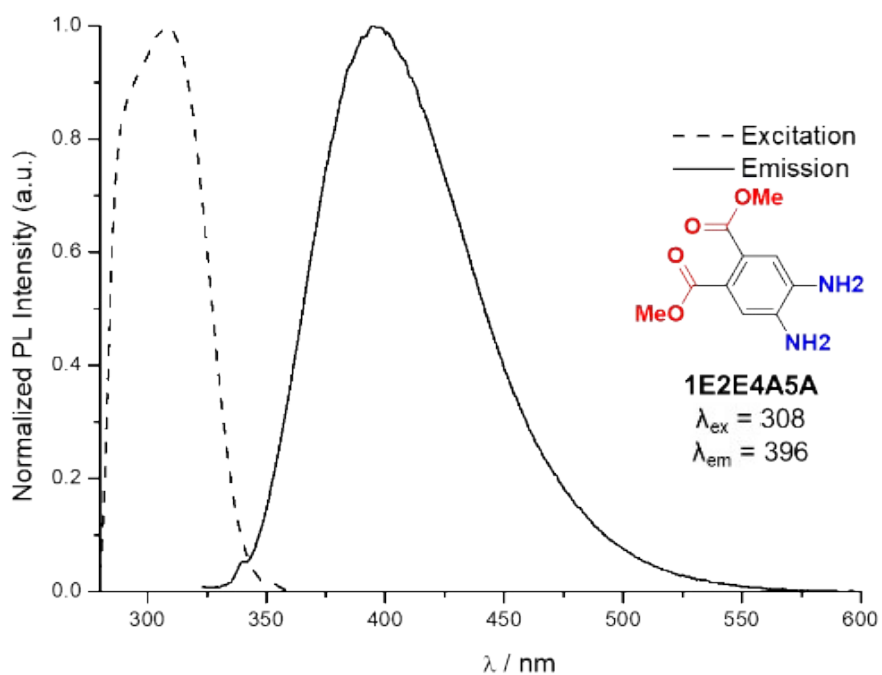

**Fig. S19** Emission and excitation spectra of **1E2E4A5A** in toluene.

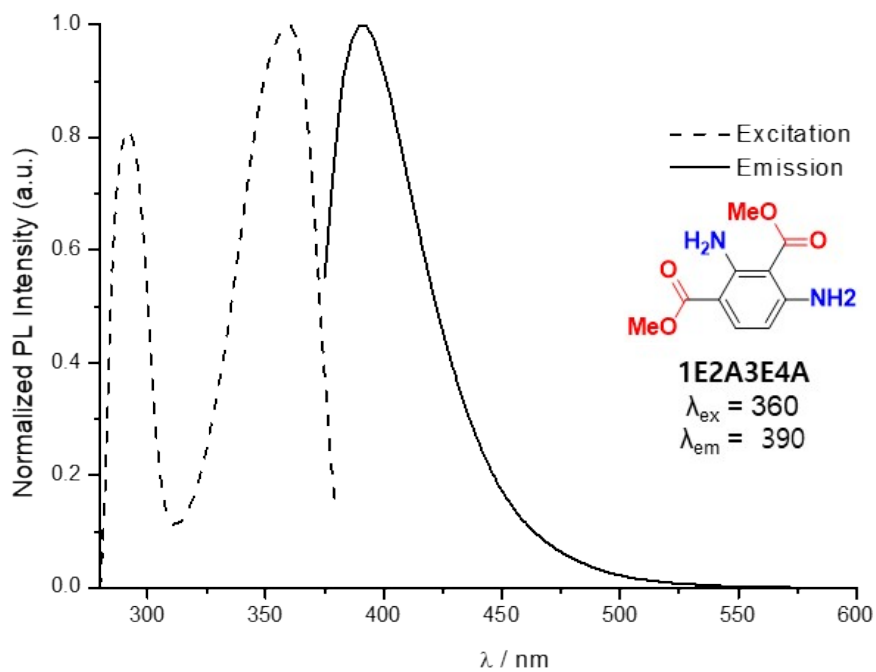

**Fig. S20** Emission and excitation spectra of **1E2A3E4A** in toluene.

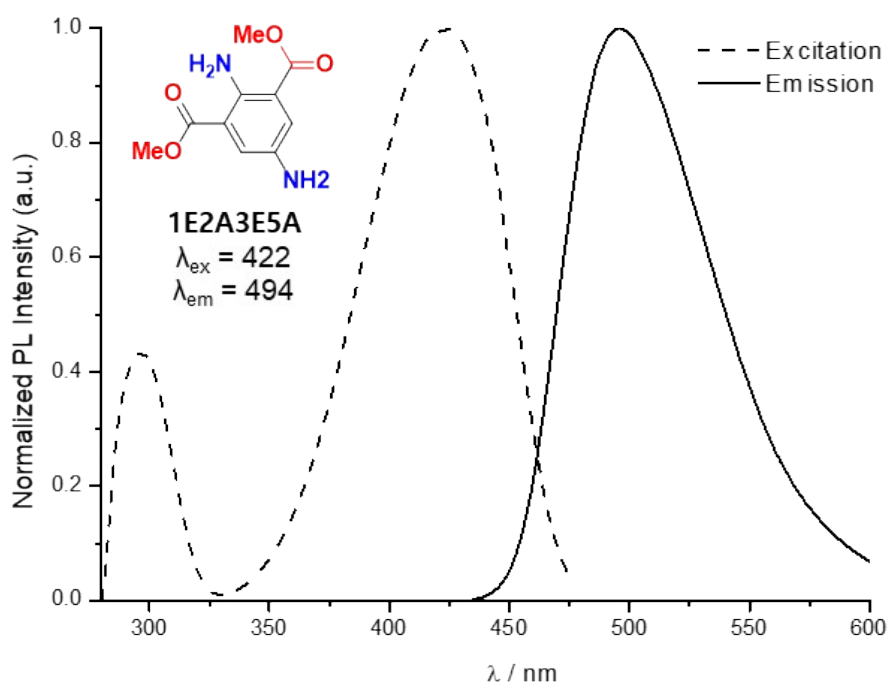

**Fig. S21** Emission and excitation spectra of **1E2A3E5A** in toluene.

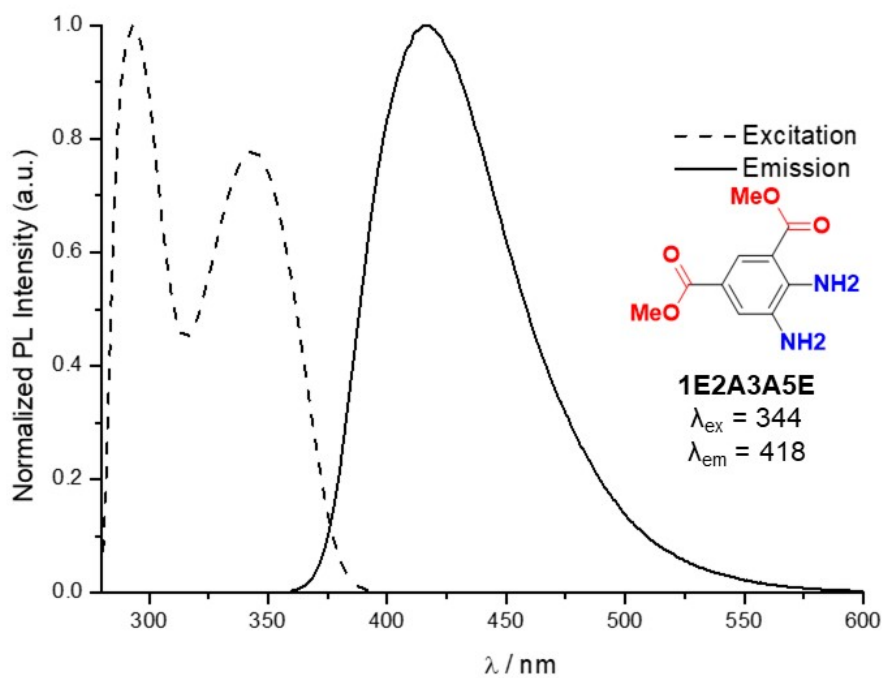

**Fig. S22** Emission and excitation spectra of **1E2A3A5E** in toluene.

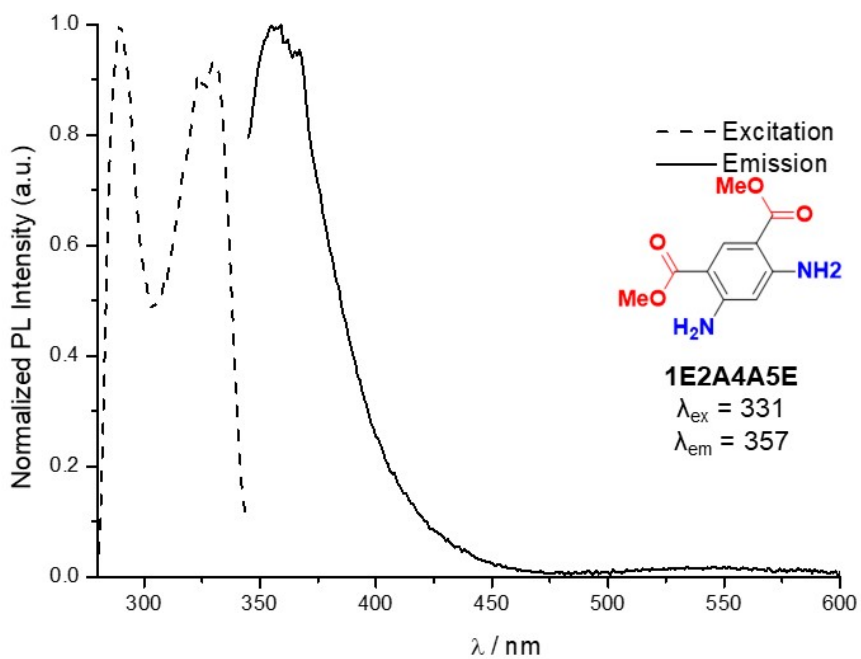

**Fig. S23** Emission and excitation spectra of **1E2A4A5E** in toluene.

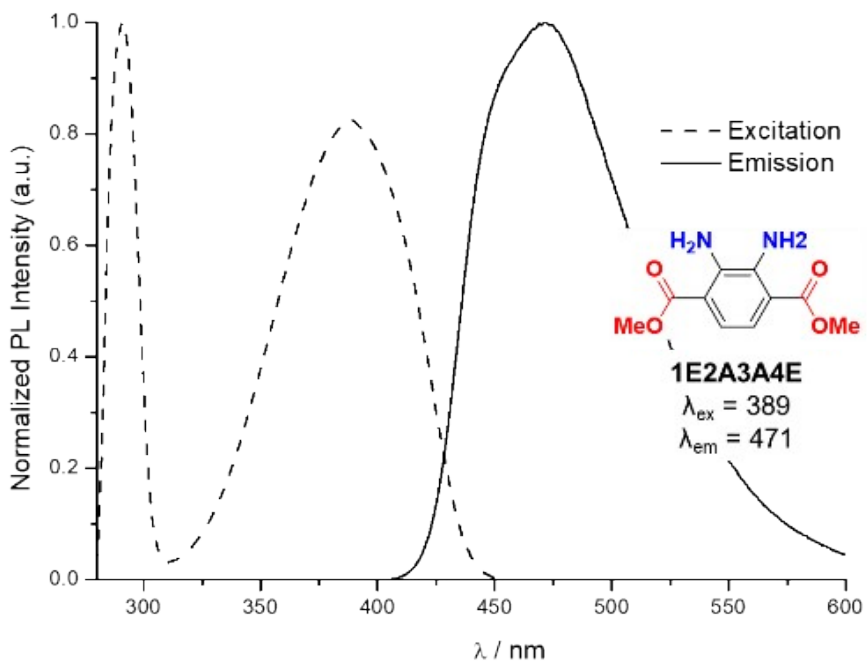

**Fig. S24** Emission and excitation spectra of **1E2A3A4E** in toluene.

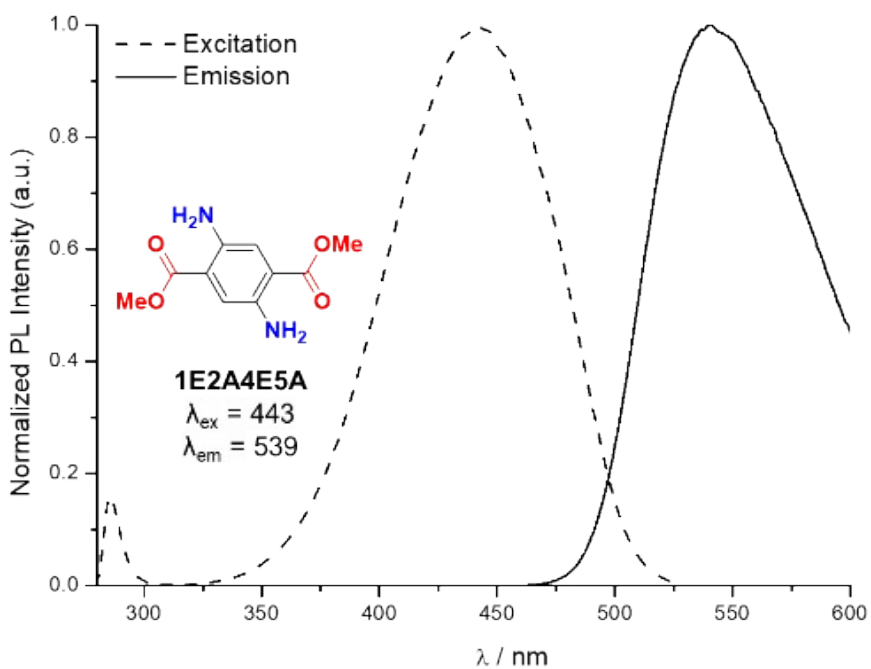

**Fig. S25** Emission and excitation spectra of **1E2A4E5A** in toluene.

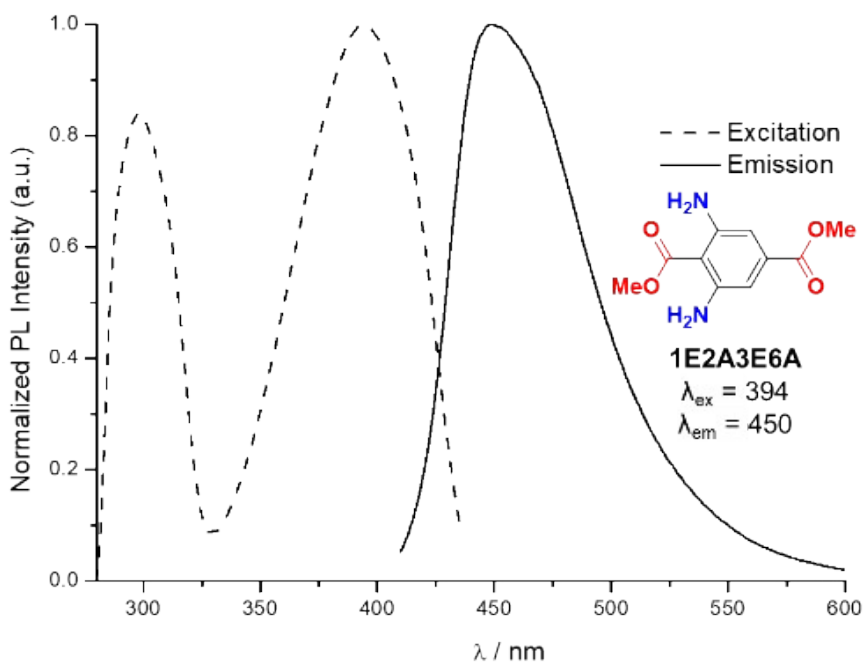

**Fig. S26** Emission and excitation spectra of **1E2A4E6A** in toluene.

|                                                                                                      |                                                                                   |                                                                                    |
|------------------------------------------------------------------------------------------------------|-----------------------------------------------------------------------------------|------------------------------------------------------------------------------------|
| 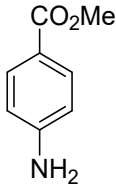<br><b>1E4A</b>     | <b>HOMO</b>                                                                       | <b>LUMO</b>                                                                        |
|                                                                                                      |  |  |
|                                                                                                      | -7.21 ev                                                                          | 0.51 ev                                                                            |
| <br><b>1E2A4E5A</b> | <b>HOMO</b>                                                                       | <b>LUMO</b>                                                                        |
|                                                                                                      |  |  |
|                                                                                                      | -6.72 ev                                                                          | -0.56 ev                                                                           |

Fig. S27 HOMOs and LUMOs for **1E4A** and **1E2A4E5A**.

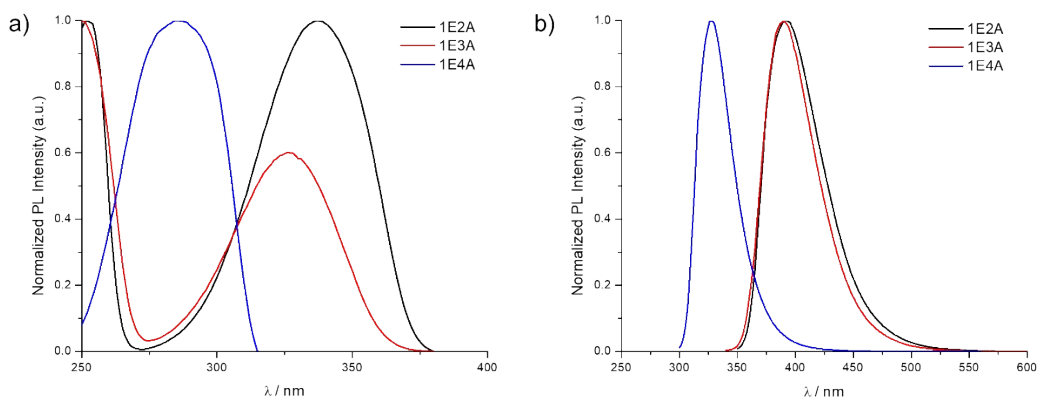

**Fig. S28** a) Excitation and b) emission spectra of mono-amino & mono-ester series in THF.

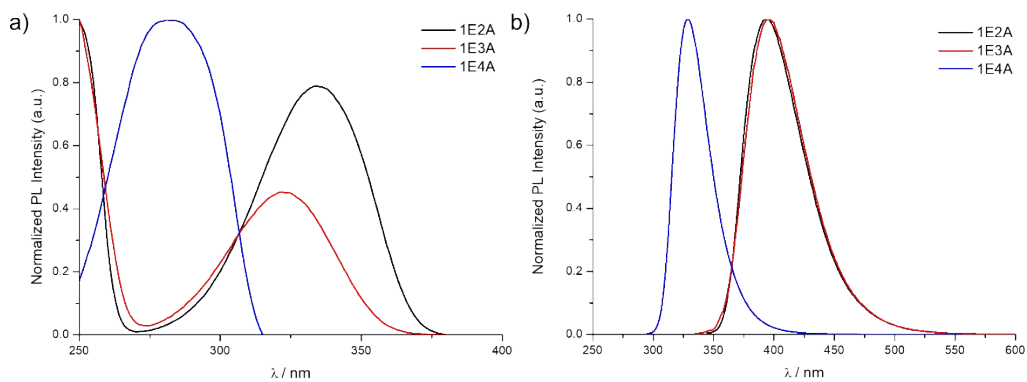

**Fig. S29** a) Excitation and b) emission spectra of mono-amino & mono-ester series in MeCN.



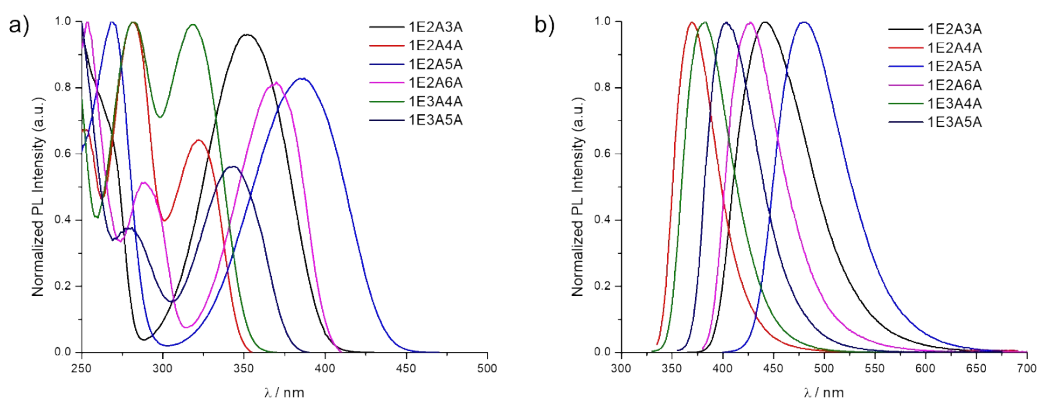

**Fig. S30** a) Excitation and b) emission spectra of di-amino & mono-ester series in THF.

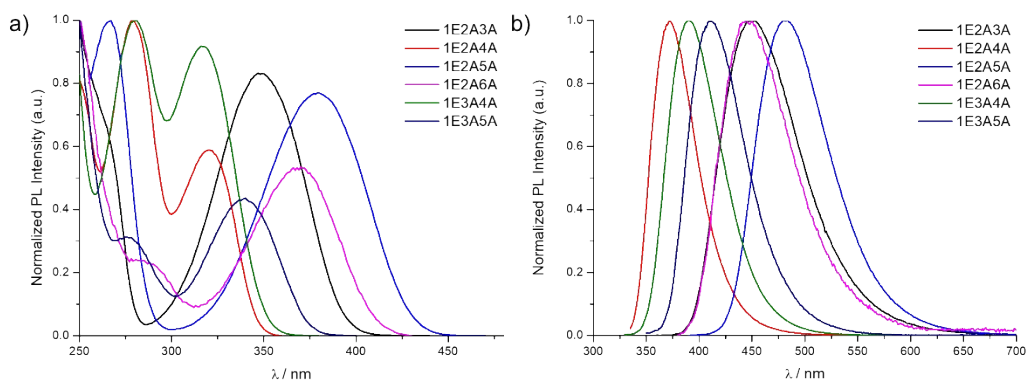

**Fig. S31** a) Excitation and b) emission spectra of di-amino & mono-ester series in MeCN.

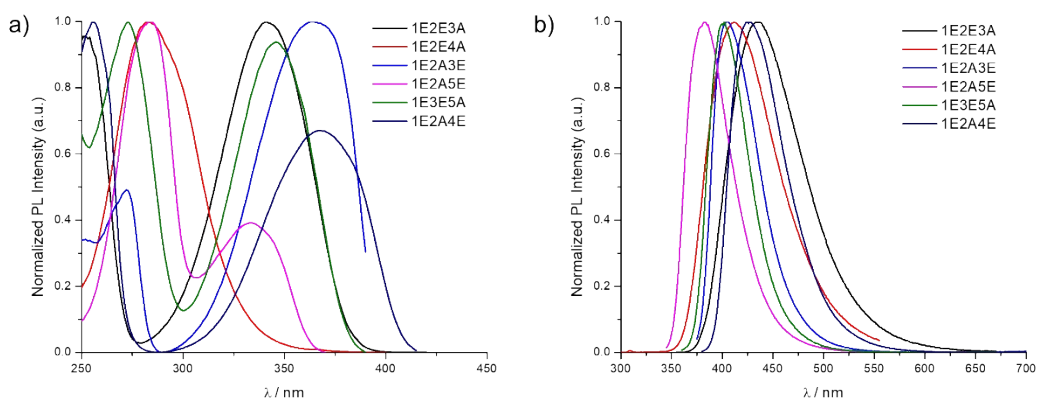

**Fig. S32** a) Excitation and b) emission spectra of mono-amino & di-ester series in THF.

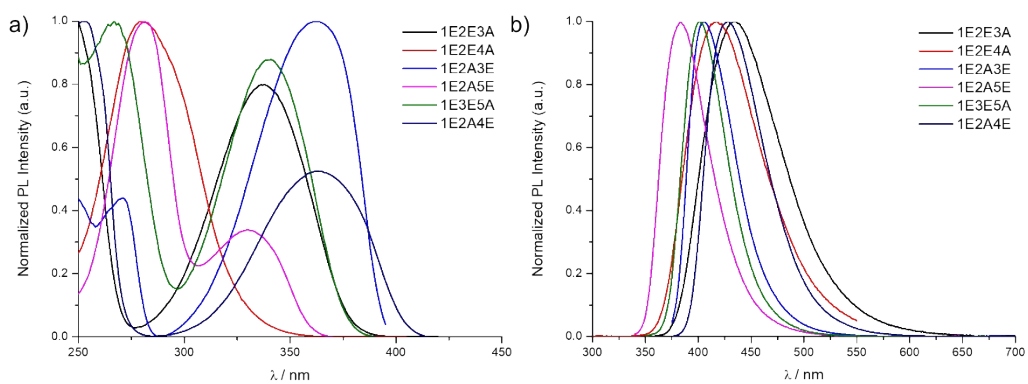

**Fig. S33** a) Excitation and b) emission spectra of mono-amino & di-ester series in MeCN.

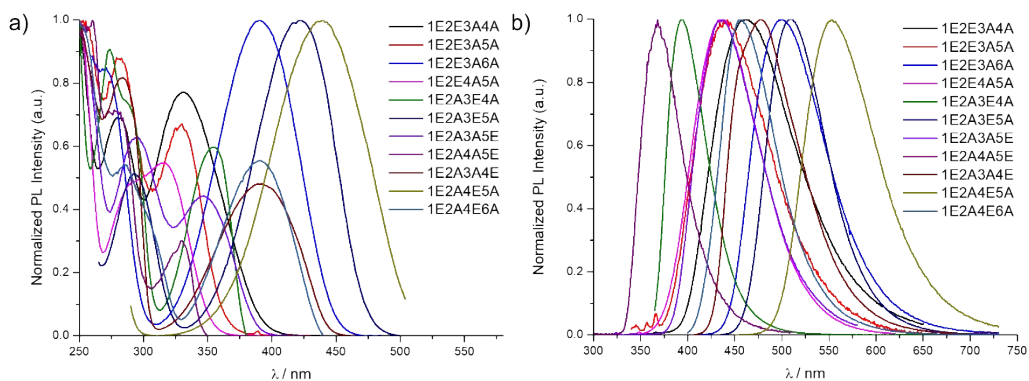

**Fig. S34** a) Excitation and b) emission spectra of di-amino & di-ester series in THF.

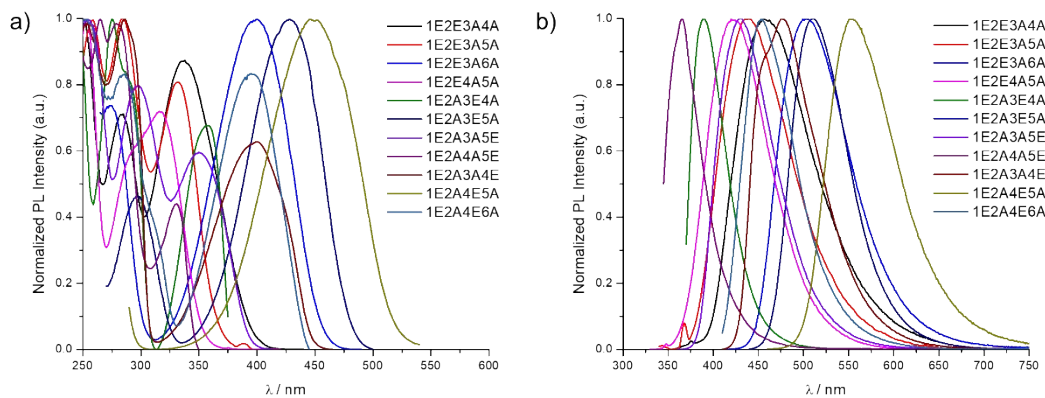

**Fig. S35** a) Excitation and b) emission spectra of di-amino & di-ester series in MeCN.

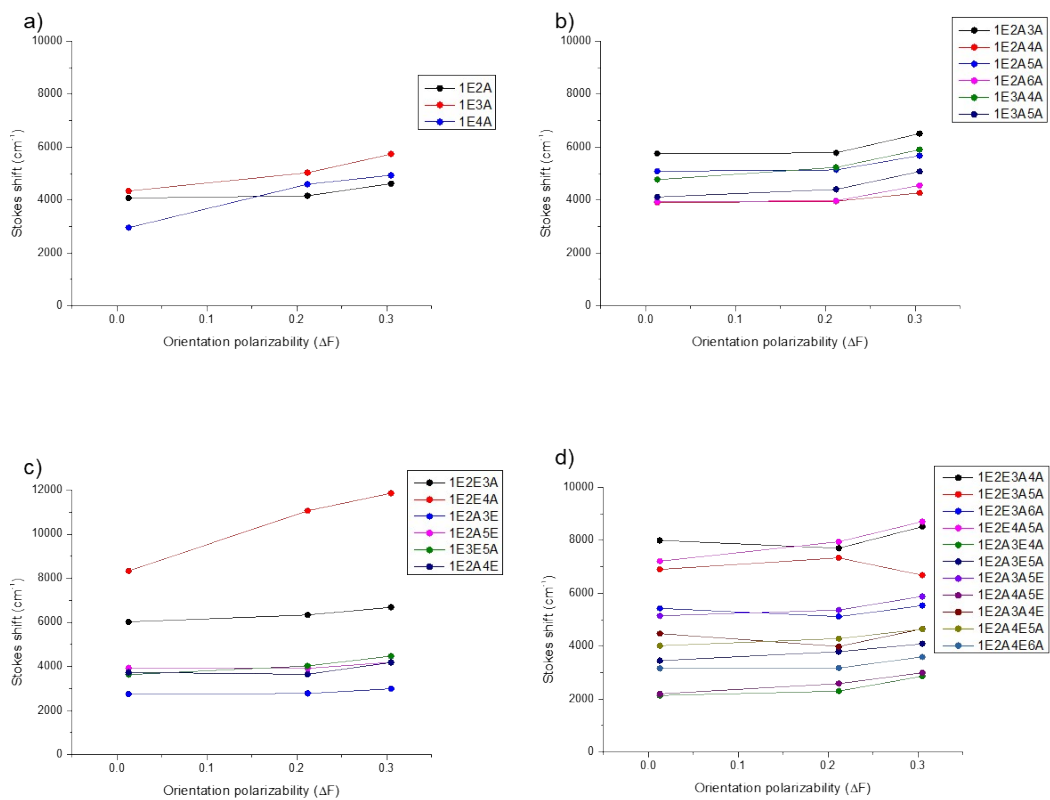

**Fig. S36** Lippert–Mataga plot of (a) mono-ester mono-amino SBBF, (b) mono-ester di-amino SBBF, (c) di-ester mono-amino SBBF and (d) di-ester di-amino SBBF series.

|                                                                                                                  |                                                                                                                   |  |
|------------------------------------------------------------------------------------------------------------------|-------------------------------------------------------------------------------------------------------------------|--|
| 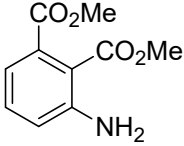 <p><b>1E2E3A</b></p>           | <b>N</b>                                                                                                          |  |
|                                                                                                                  |  <p><math>1.8^\circ</math></p>  |  |
| <b>E-1</b>                                                                                                       | <b>E-2</b>                                                                                                        |  |
|  <p><math>44.8^\circ</math></p> |  <p><math>40.7^\circ</math></p> |  |

**Fig. S37** Angular distortions between benzene plane and functional groups (E-1: ester at C1; E-2: ester at C2; N: amine at C3) of **1E2E3A** from crystal structural analysis.<sup>S17</sup>

|                                                                                                                    |                                                                                                                    |                                                                                                                     |                                                                                                                      |
|--------------------------------------------------------------------------------------------------------------------|--------------------------------------------------------------------------------------------------------------------|---------------------------------------------------------------------------------------------------------------------|----------------------------------------------------------------------------------------------------------------------|
| 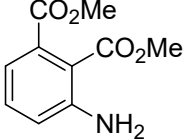 <p><b>1E2E3A</b></p>           | <b>N</b>                                                                                                           |                                                                                                                     |                                                                                                                      |
|                                                                                                                    | GS                                                                                                                 | ES                                                                                                                  |                                                                                                                      |
|  <p><math>31.5^\circ</math></p> |                                                                                                                    |  <p><math>8.8^\circ</math></p> |                                                                                                                      |
| <b>E-1</b>                                                                                                         |                                                                                                                    | <b>E-2</b>                                                                                                          |                                                                                                                      |
| GS                                                                                                                 | ES                                                                                                                 | GS                                                                                                                  | ES                                                                                                                   |
|  <p><math>49.6^\circ</math></p> |  <p><math>22.8^\circ</math></p> |  <p><math>31.1^\circ</math></p>  |  <p><math>31.2^\circ</math></p> |

**Fig. S38** Planar angles between functional group and benzene plane based on DFT calculated structure in ground state and excited state of **1E2E3A**.

|                                                                                                        |                                                                                                 |  |
|--------------------------------------------------------------------------------------------------------|-------------------------------------------------------------------------------------------------|--|
| 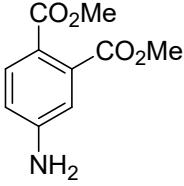 <p><b>1E2E4A</b></p> | <b>N</b>                                                                                        |  |
|                                                                                                        |  <p>17.3°</p> |  |
| <b>E-1</b>                                                                                             | <b>E-2</b>                                                                                      |  |
|  <p>75.9°</p>         |  <p>4.7°</p>  |  |

**Fig. S39** Angular distortions between benzene plane and functional groups (E-1: ester at C1; E-2: ester at C2; N: amine at C4) of **1E2E4A** from crystal structural analysis.

|                                                                                                         |                                                                                                   |                                                                                                  |                                                                                                    |  |
|---------------------------------------------------------------------------------------------------------|---------------------------------------------------------------------------------------------------|--------------------------------------------------------------------------------------------------|----------------------------------------------------------------------------------------------------|--|
| 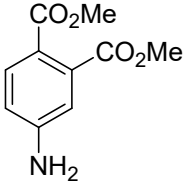 <p><b>1E2E4A</b></p> | <b>N</b>                                                                                          |                                                                                                  |                                                                                                    |  |
|                                                                                                         | <b>GS</b>                                                                                         |                                                                                                  | <b>ES</b>                                                                                          |  |
|                                                                                                         |  <p>35.8°</p>  |                                                                                                  |  <p>4.35°</p> |  |
| <b>E-1</b>                                                                                              |                                                                                                   | <b>E-2</b>                                                                                       |                                                                                                    |  |
| <b>GS</b>                                                                                               | <b>ES</b>                                                                                         | <b>GS</b>                                                                                        | <b>ES</b>                                                                                          |  |
|  <p>37.2°</p>        |  <p>16.33°</p> |  <p>36.3°</p> |  <p>40.6°</p> |  |

**Fig. S40** Planar angles between functional group and benzene plane based on DFT calculated structure in ground state and excited state of **1E2E4A**

|                                                                                                    | <b>N</b>                                                                                          |                                                                                                    |
|----------------------------------------------------------------------------------------------------|---------------------------------------------------------------------------------------------------|----------------------------------------------------------------------------------------------------|
|                                                                                                    | GS                                                                                                | ES                                                                                                 |
| 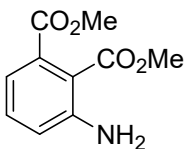<br><b>1E2E3A</b> | <br><i>10.4°</i> | <br><i>26.1°</i> |
| <br><b>1E2E4A</b> | <br><i>11.5°</i> | <br><i>24.9°</i> |

**Fig. S41** Torsion angles between functional group and benzene plane based on DFT calculated structure in ground state and excited state of **1E2E3A** and **1E2E4A**.

## References for ESI

- S1. H. Ha, H. Hahm, D. G. Jwa, K. Yoo, M. H. Park, M. Yoon, Y. Kim, M. Kim, *CrystEngComm*. 2017, **19**, 5361
- S2. H. Kojima, N. Nakatsubo, K. Kikuchi, S. Kawahara, Y. Kirino, H. Nagoshi, Y. Hirata, T. Nagano, *Anal. Chem.* 1998, **70**, 2446.
- S3 C. Lavigueur, E. J. Foster, V. E. Williams, *J. Am. Chem. Soc.* 2008, **130**, 11791.
- S4 S. R. Nam, H. Y. Lee, J.-I. Hong, *Tetrahedron*, 2008, **64**, 10531.
- S5 P. Funk, K. Motyka, P. Džubák, P. Znojek, S. Gurská, J. Kusz, C. McMaster, M. Hajdúch, M. Soral, *RSC Adv.*, **2015**, 48861.
- S6 World Intellectual Property Organization, WO2020172655.
- S7 K. Yagi, K. Ohira, K. Yamana, K. Imato, R. Kawasaki, A. Ikeda, Y. Ooyama, *Org. Biomol. Chem.*, 2023, **21**, 5194.
- S8 A. Yokoyama, M. Karasawa, R. Kiyota, *Polym J.*, 2015, **47**, 348.
- S9 R. Huang, B. Tang, K. Ye, C. Wang, H. Zhang, *Advanced Optical Materials*, 2019, **7**, 1900927.
- S10 Japan, JP11246512A.
- S11 J.T. Markiewicz, O. Wiest, P. Helquist, *J. Org. Chem.* 2010, **75**, 4887.
- S12 S. Yang, A. C. Garner, J. D. Wallis, *CrystEngComm*. 2020, **22**, 3701.
- S13 World Intellectual Property Organization, WO2020089571.
- S14 D.-W. Wang, H.-Y. Lin, R.-J. Cao, S.-G. Yang, Q. Chen, G.-F. Hao, W.-C. Yang, G.-F. Yang *J. Agric. Food Chem.* 2014, **62**, 49, 11786.
- S15 Gaussian 09, Revision A.02, M. J. Frisch, G. W. Trucks, H. B. Schlegel, G. E. Scuseria, M. A. Robb, J. R. Cheeseman, G. Scalmani, V. Barone, G. A. Petersson, H. Nakatsuji, X. Li, M. Caricato, A. Marenich, J. Bloino, B. G. Janesko, R. Gomperts, B. Mennucci, H. P. Hratchian, J. V. Ortiz, A. F. Izmaylov, J. L. Sonnenberg, D. Williams-Young, F. Ding, F. Lipparini, F. Egidi, J. Goings, B. Peng, A. Petrone, T. Henderson, D. Ranasinghe, V. G. Zakrzewski, J. Gao, N. Rega, G. Zheng, W. Liang, M. Hada, M. Ehara, K. Toyota, R. Fukuda, J. Hasegawa, M. Ishida, T. Nakajima, Y. Honda, O. Kitao, H. Nakai, T. Vreven, K. Throssell, J. A. Montgomery, Jr., J. E. Peralta, F. Ogliaro, M. Bearpark, J. J. Heyd, E. Brothers, K. N. Kudin, V. N. Staroverov, T. Keith, R. Kobayashi, J. Normand, K. Raghavachari, A. Rendell, J. C. Burant, S. S. Iyengar, J. Tomasi, M. Cossi, J. M. Millam, M. Klene, C. Adamo, R. Cammi, J. W. Ochterski, R. L. Martin, K. Morokuma, O. Farkas, J.



B. Foresman, and D. J. Fox, Gaussian, Inc., Wallingford CT, 2016.

S16 P. Dev, S. Agrawal, N. J. English, *J. Chem. Phys.* 2012, **136**, 224301.

S17 R. G. Lavanya, G. N. Anil Kuma, *CCDC 1903412*; DOI: 10.5517/ccdc.csd.cc21wnd0

## *Appendix I*

**Spectral copies of  $^1\text{H}$  NMR,  $^{13}\text{C}$   
NMR and IR for the obtained  
compounds  
(including HPLC data for  
1E2A3E4A and 1E2A4E6A)**

# Methyl 2,3-diaminobenzoate (1E2A3A)

20240530.14.1.1r  
B-2,4-proton

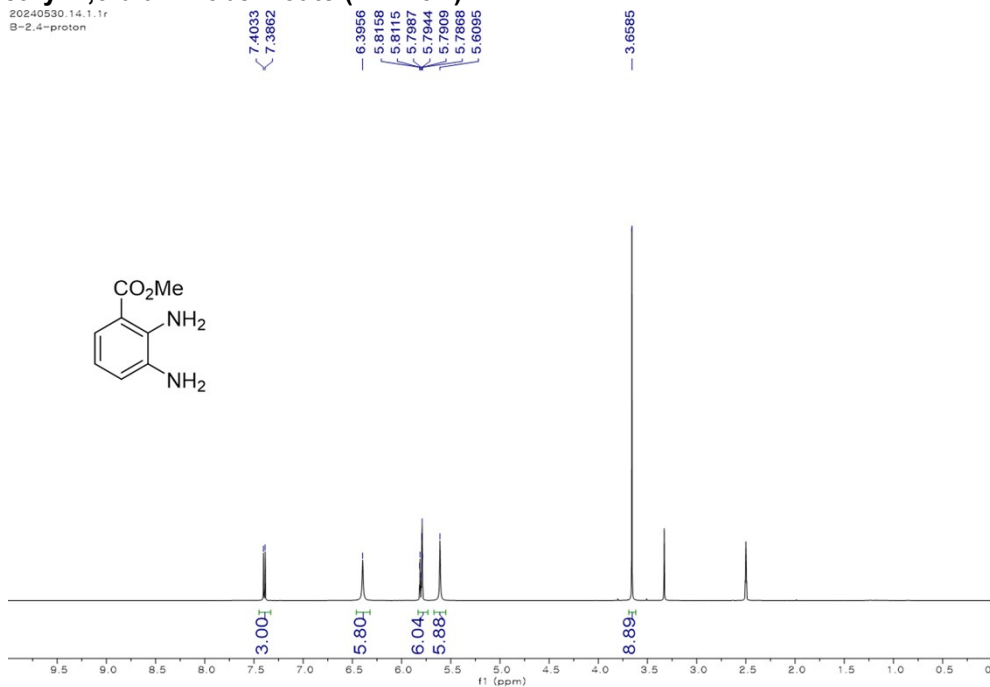

20240530.18.1.1r  
B-2,3-carbon

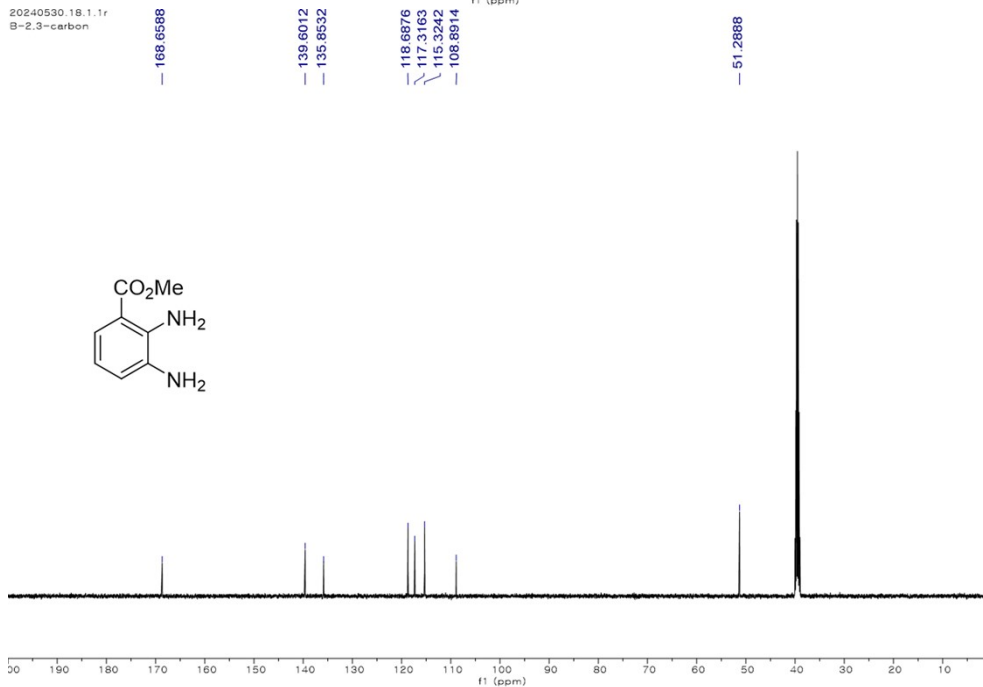

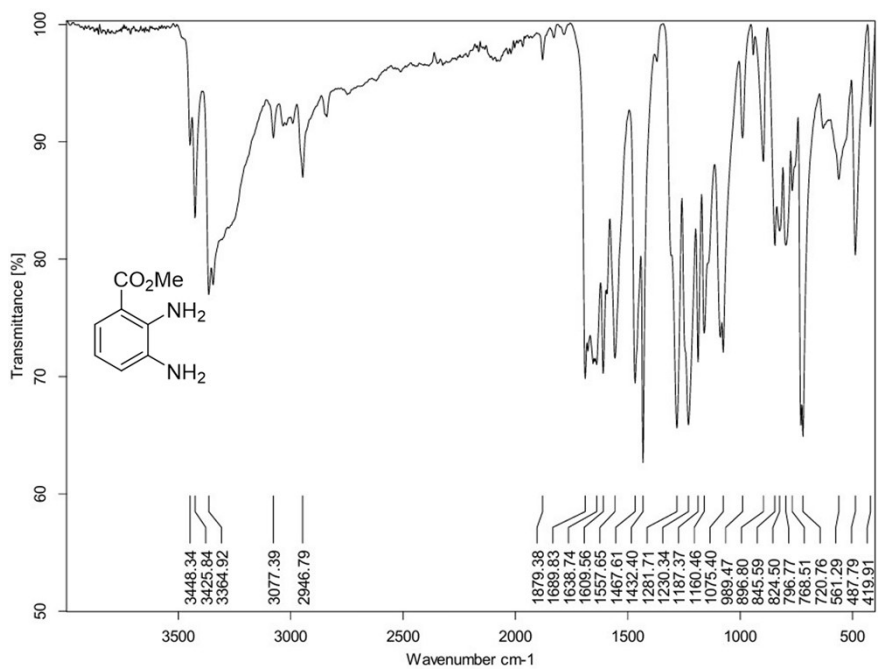

# Methyl 2,4-diaminobenzoate (1E2A4A)

20240530\_19.1.1r  
B-2,4-proton

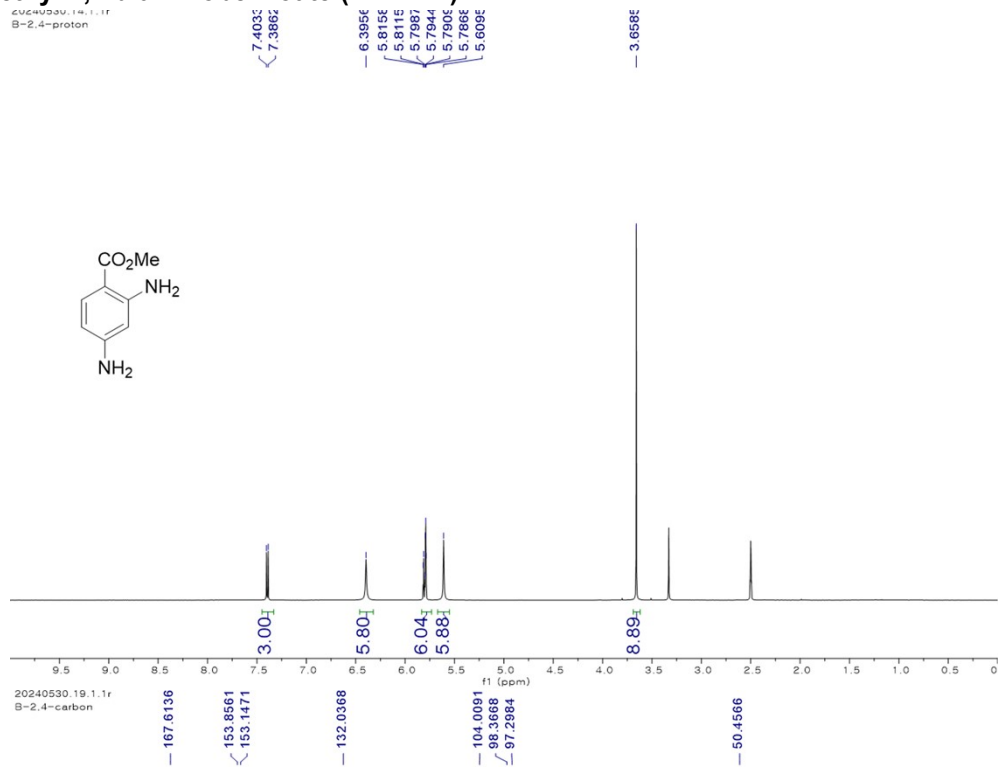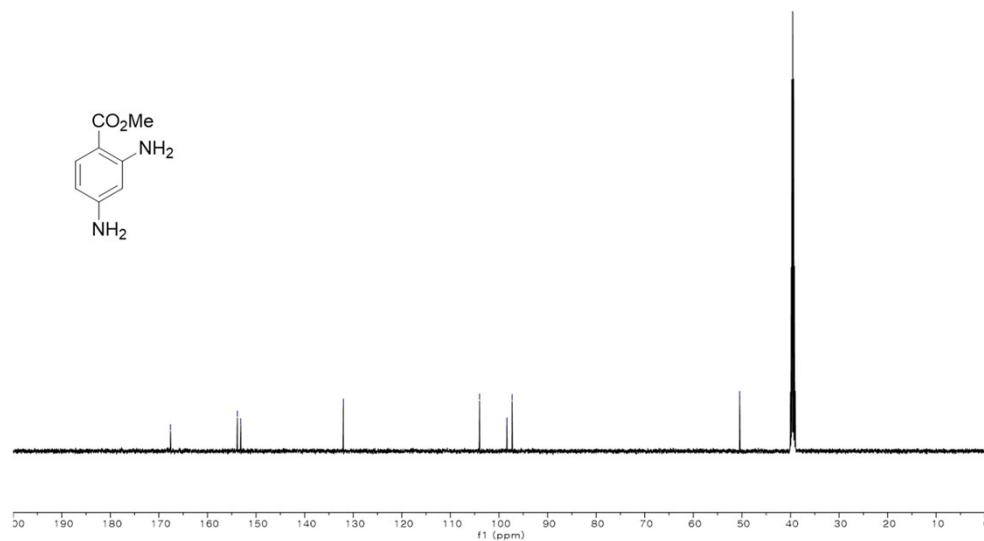

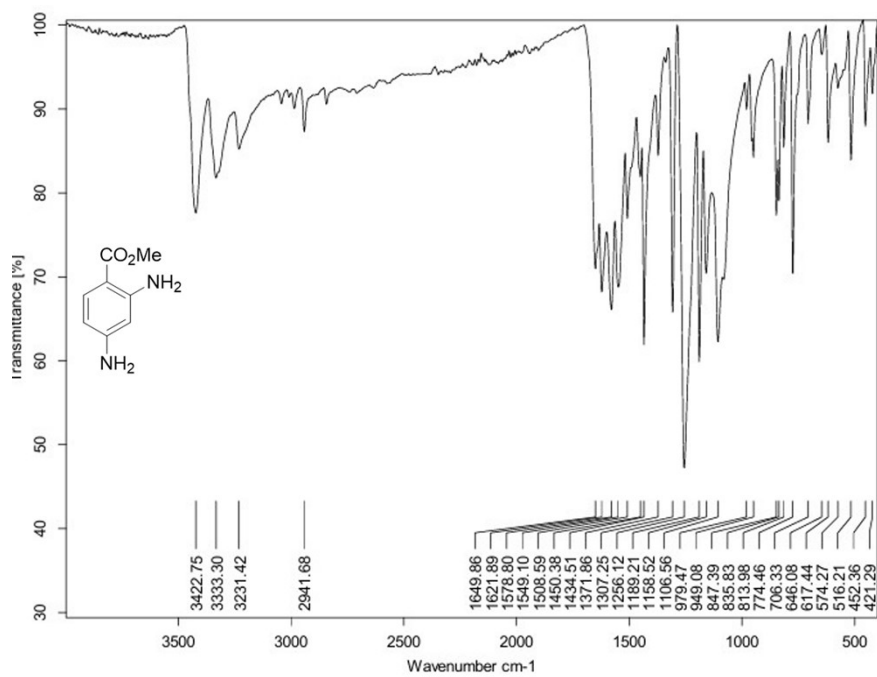

# Methyl 2,5-diaminobenzoate (1E2A5A)

20240530.15.1.1r  
B-2.5-proton

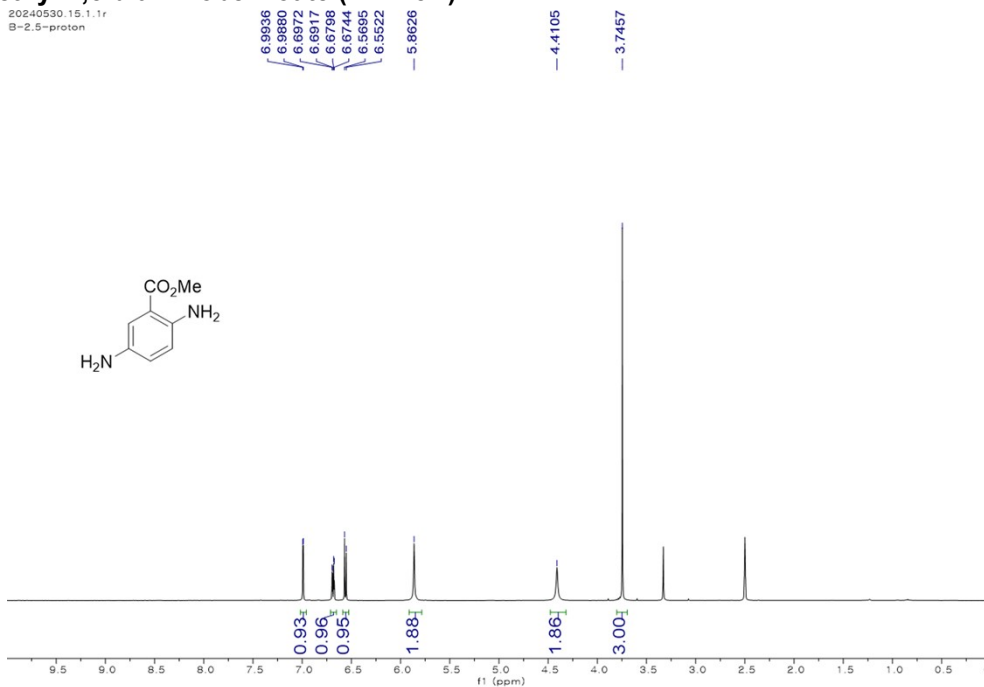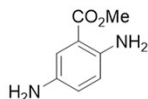

20240530.20.1.1r  
B-2.5-carbon

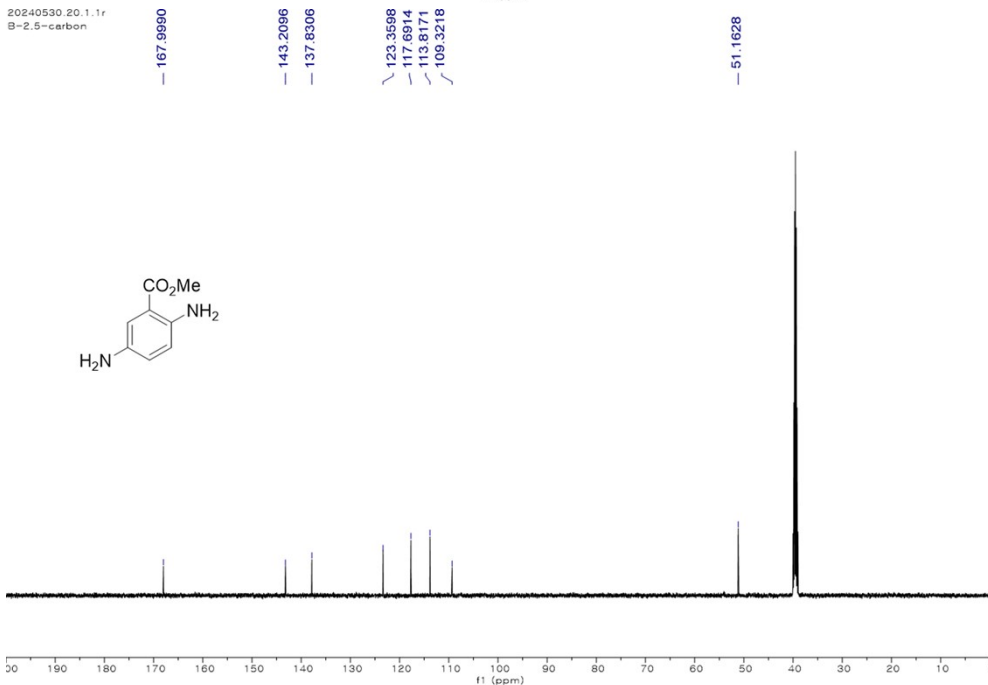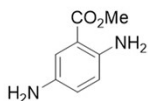

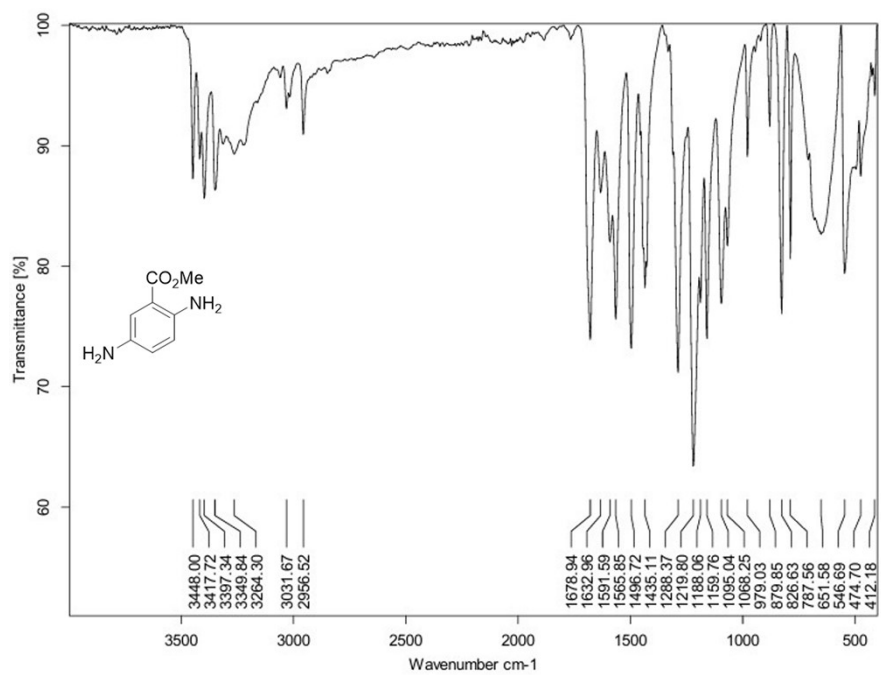



# Methyl 2,6-diaminobenzoate (1E2A6A)

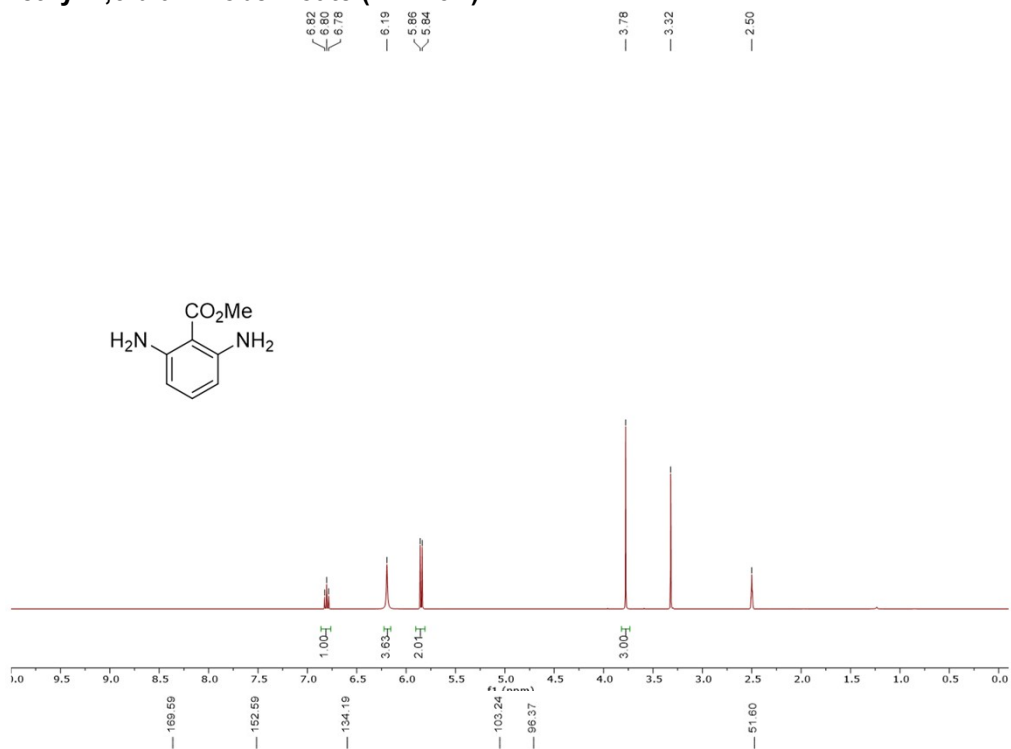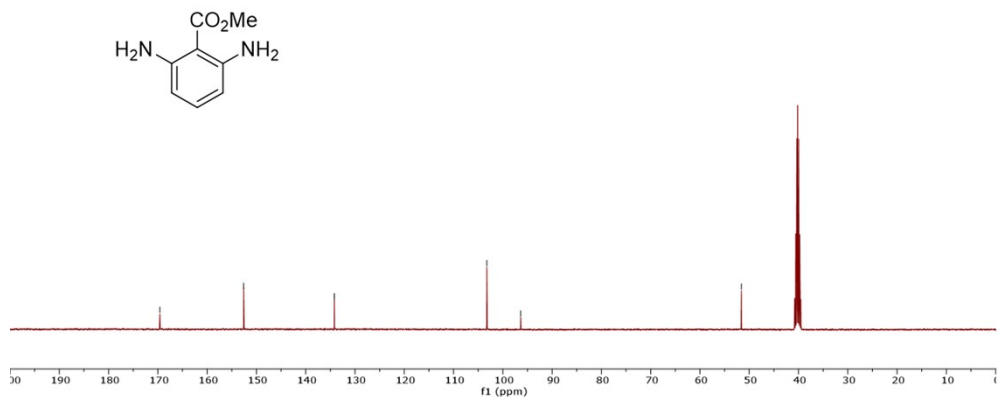

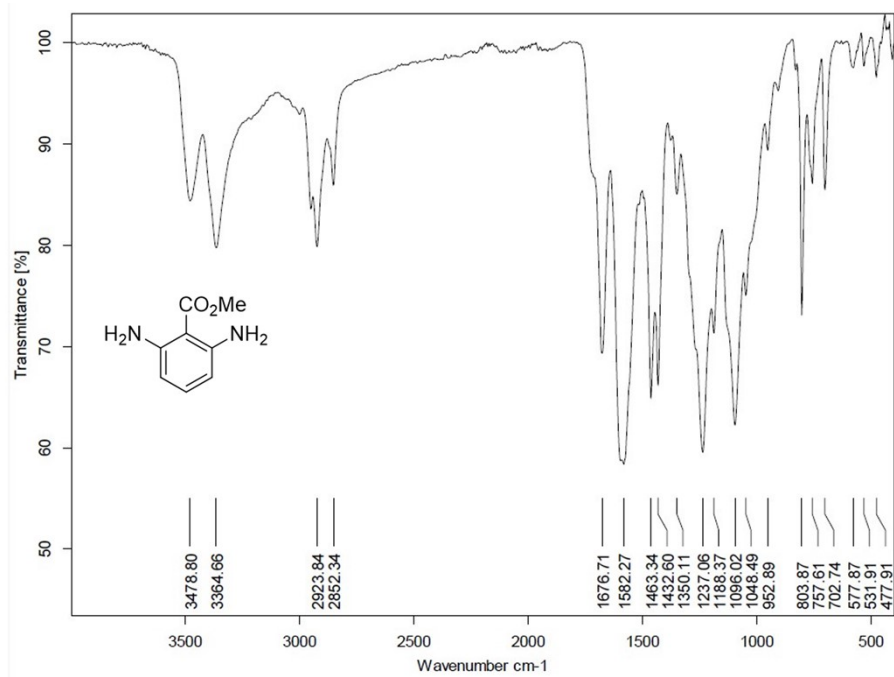

# Methyl 3,4-diaminobenzoate (1E3A4A)

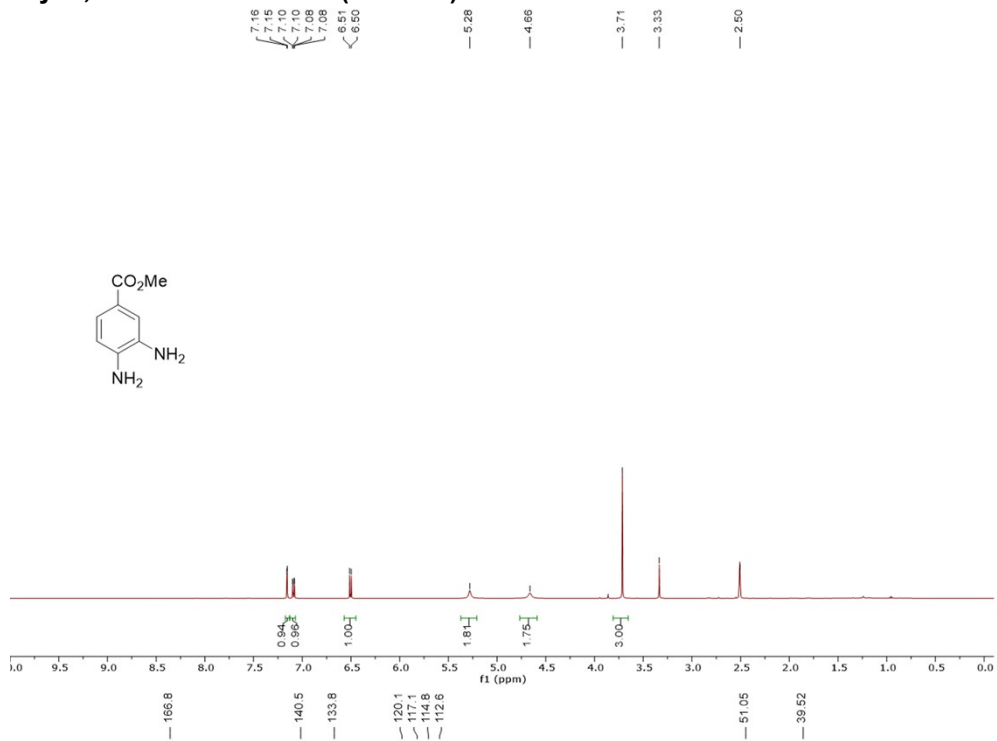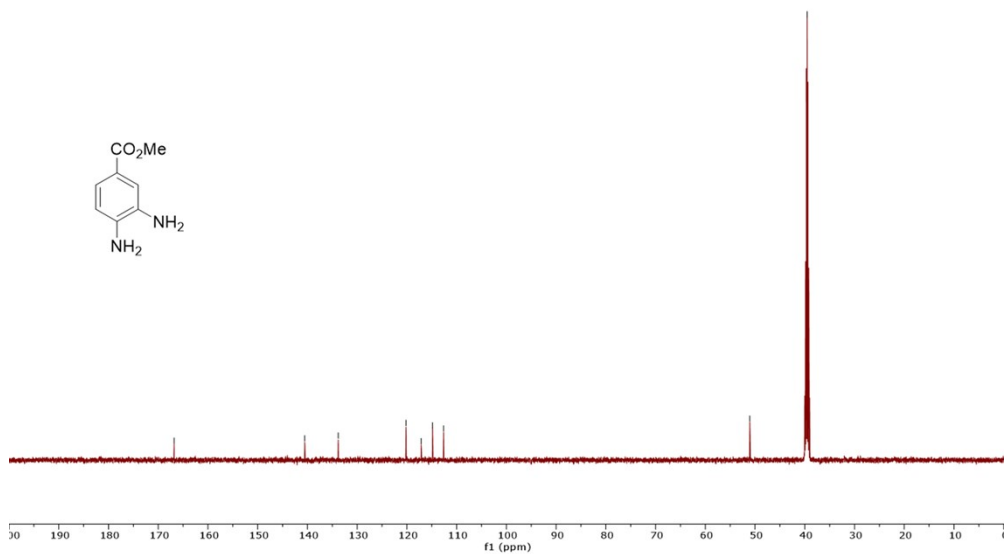

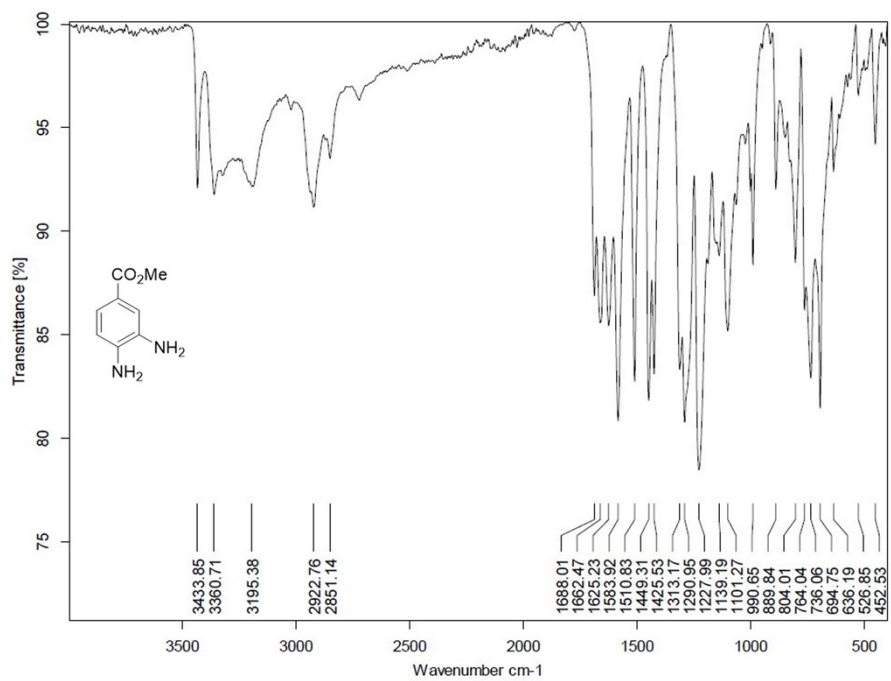

# Methyl 3,5-diaminobenzoate (1E3A5A)

20240530.16.1.1r  
B-3.5-proton

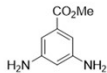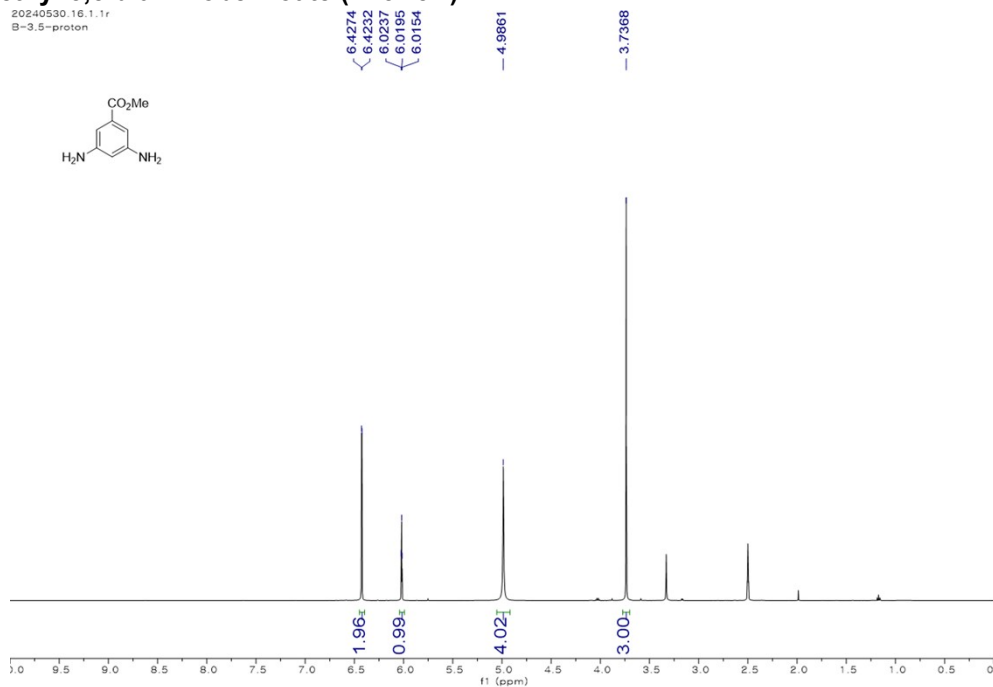

20240530.21.1.1r  
B-3.5-carbon

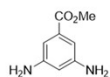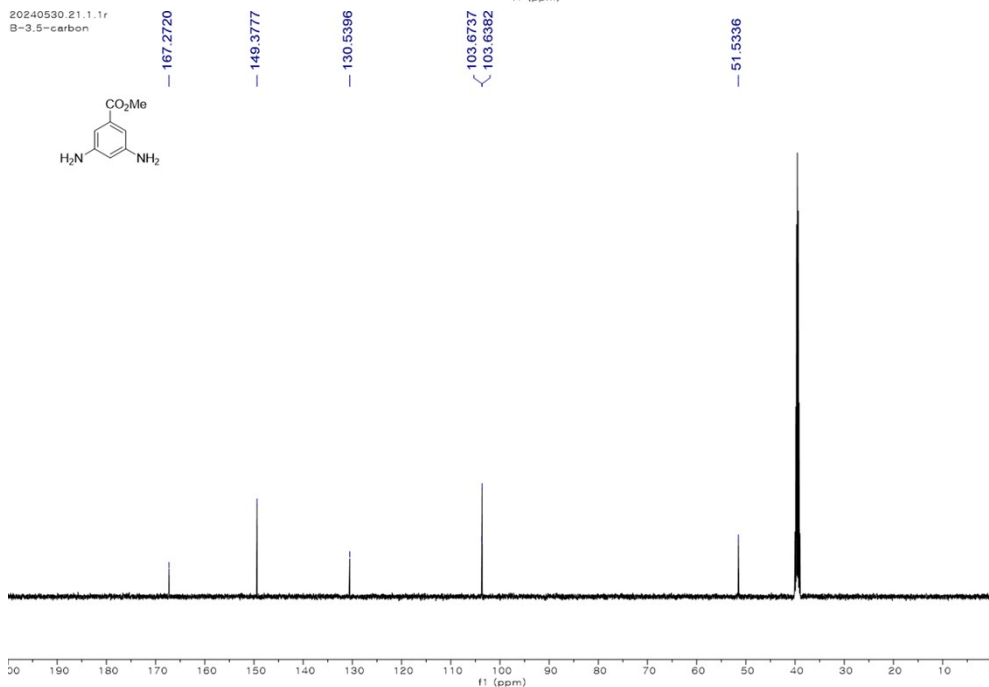

# Dimethyl 3-aminophthalate (1E2E3A)

20240520\_24.1.1r  
o-DB-3-proton

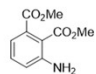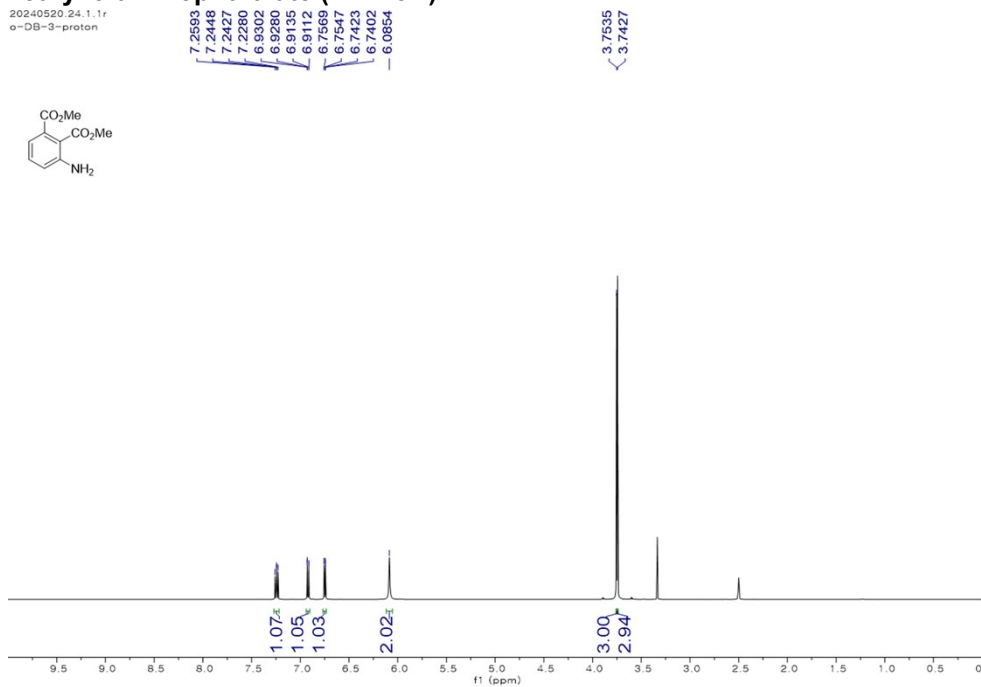

20240520\_26.1.1r  
o-DB-3-carbon

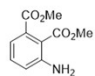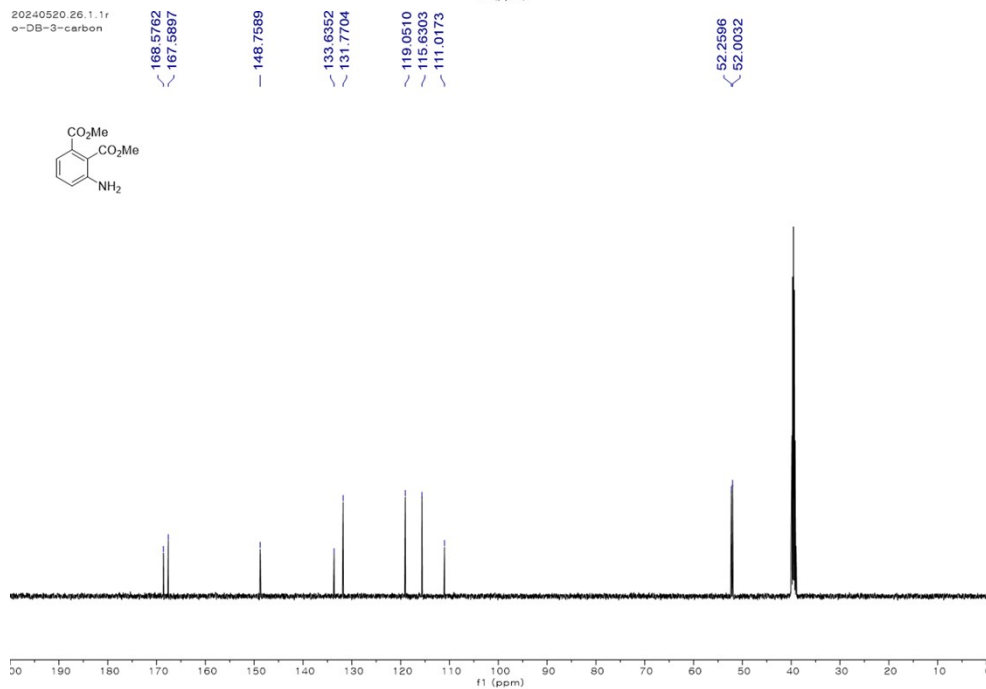

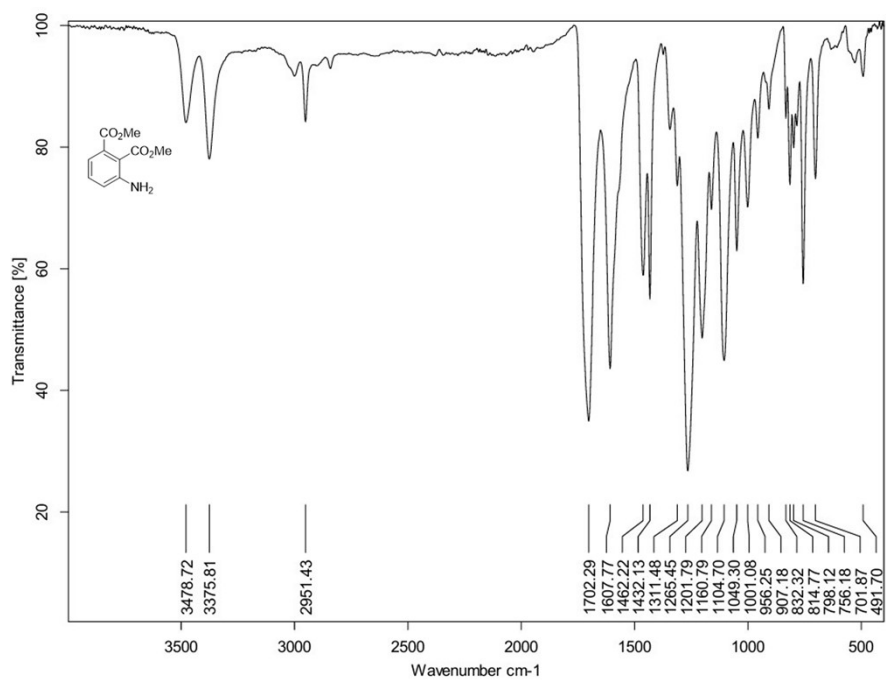

# Dimethyl 4-aminophthalate (1E2E4A)

20240520.25.1.1r  
o-DB-4-proton

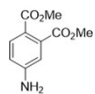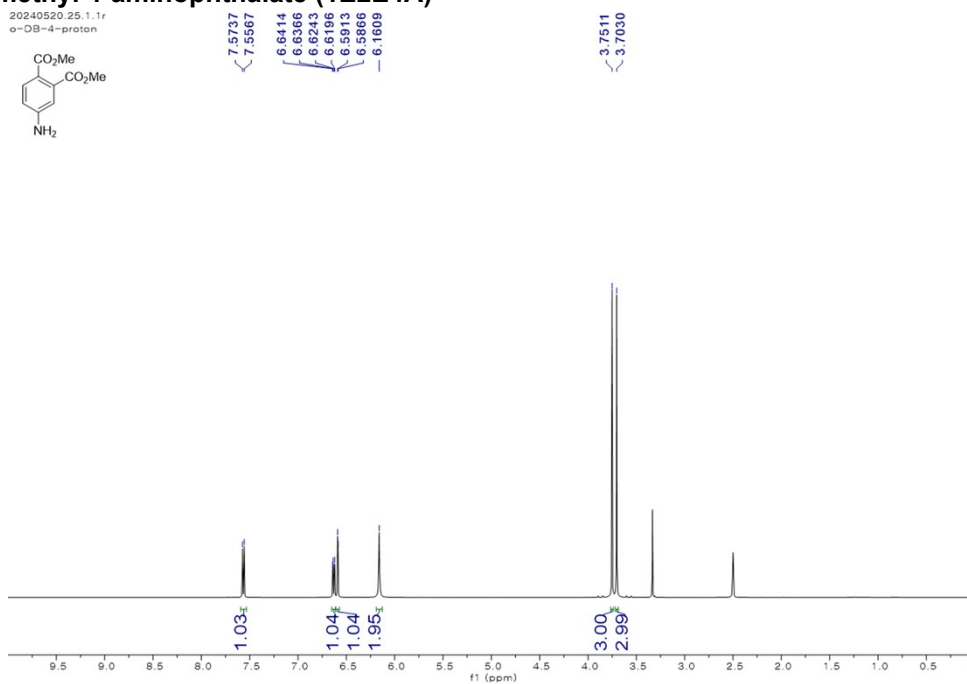

20240520.27.1.1r  
o-DB-4-carbon

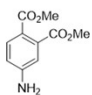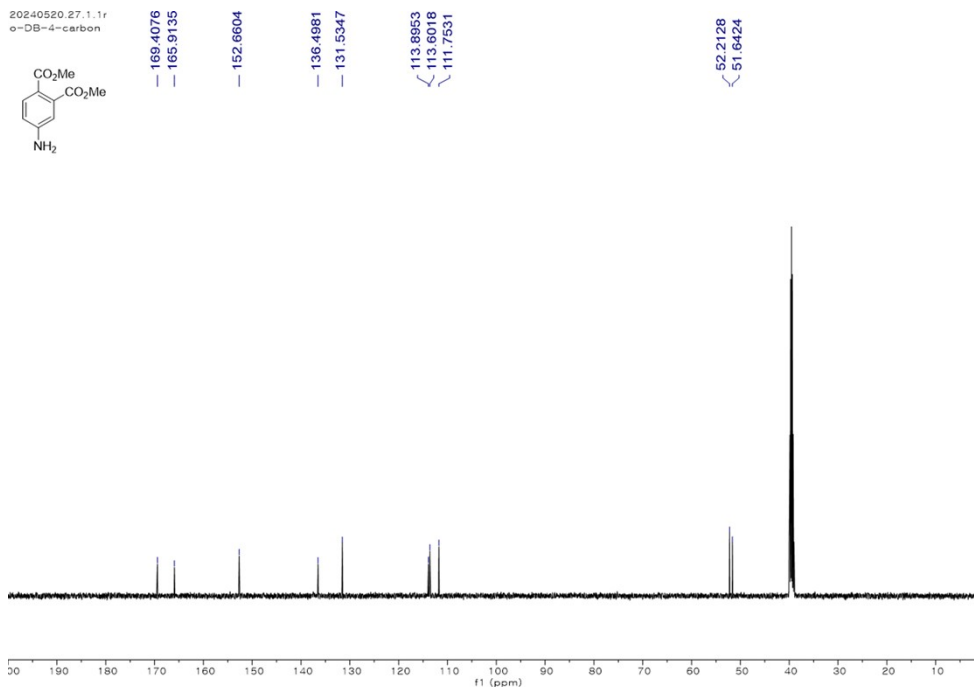



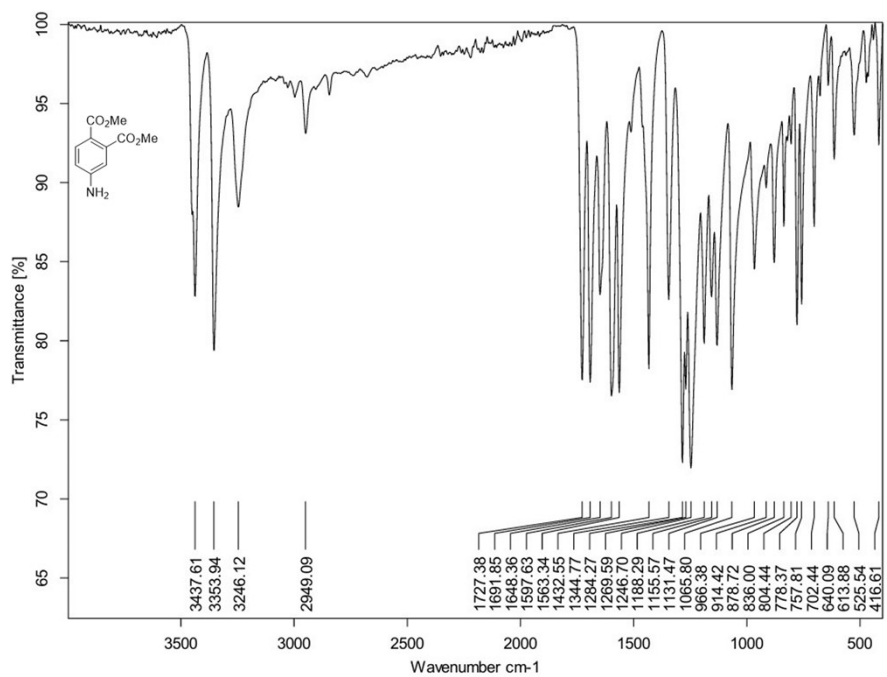

# Dimethyl 2-aminoisophthalate (1E2A3E)

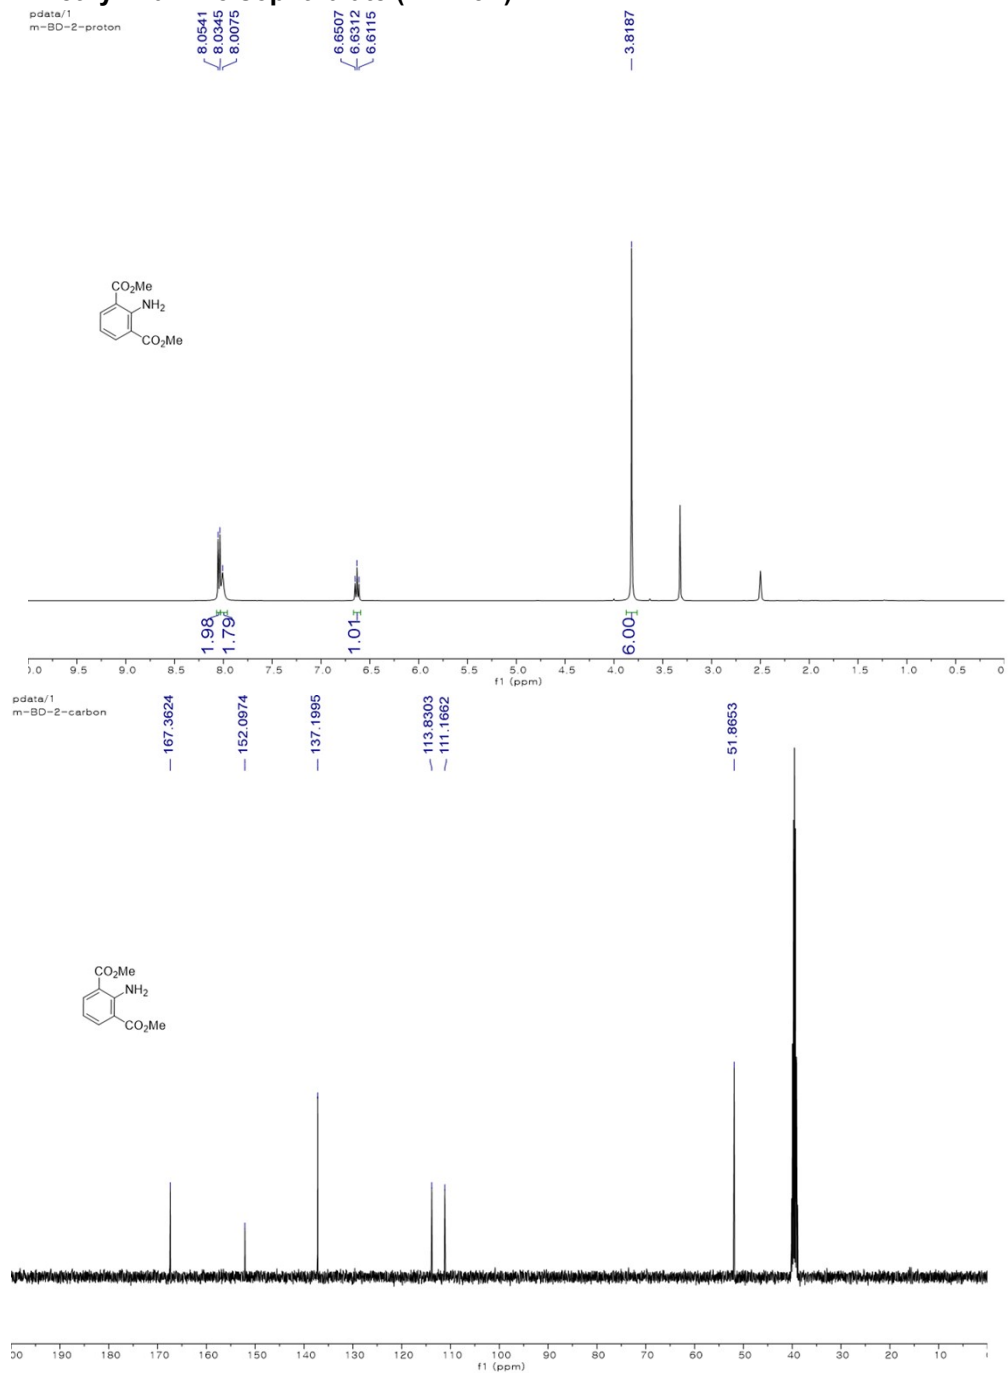

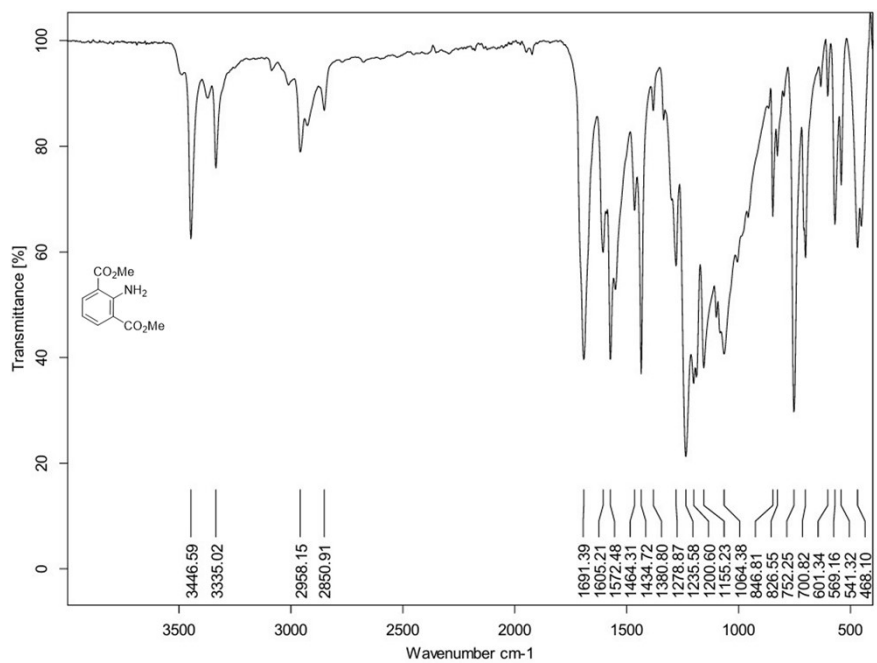

# Dimethyl 4-aminoisophthalate (1E2A5E)

pdate/1  
m-DB-4-proton

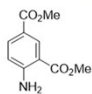

8.3661  
8.3628  
7.7874  
7.7818  
7.7653  
7.7599  
7.3455  
6.8390  
6.8169  
3.8211  
3.7703

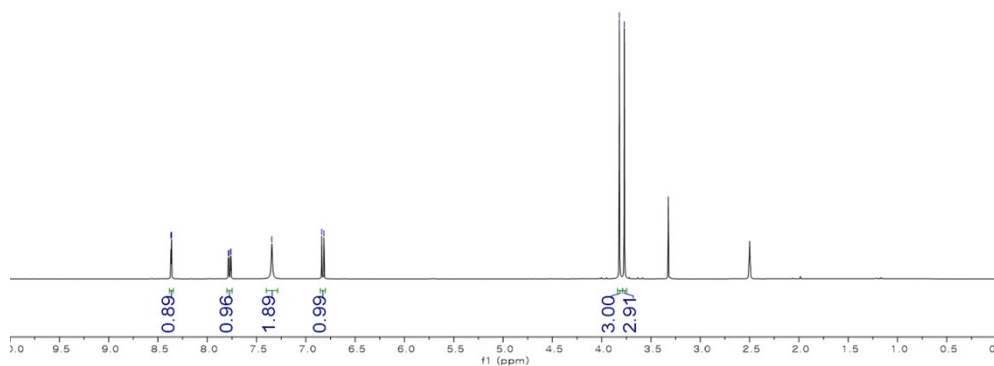

pdate/1  
m-DB-4-carbon

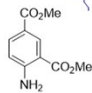

167.1618  
165.6470  
154.5894  
134.1922  
133.4544  
116.4203  
115.4526  
107.9643  
51.6889  
51.5226

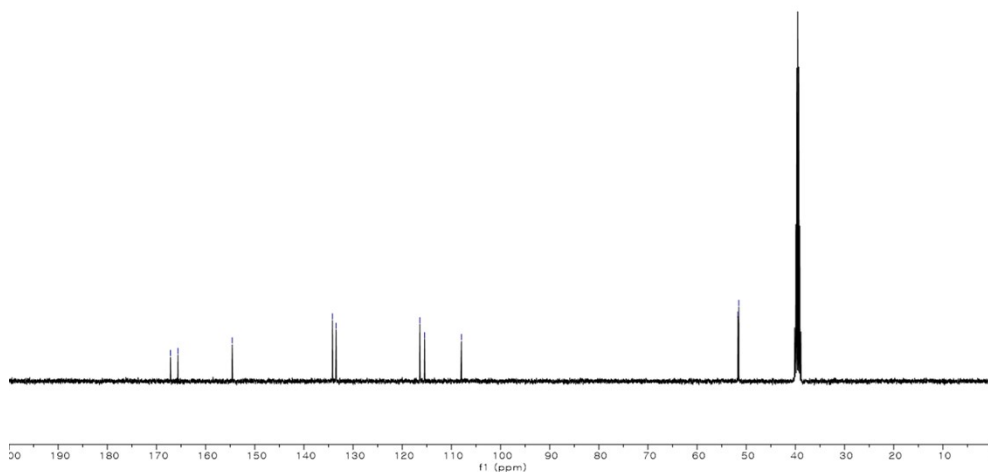

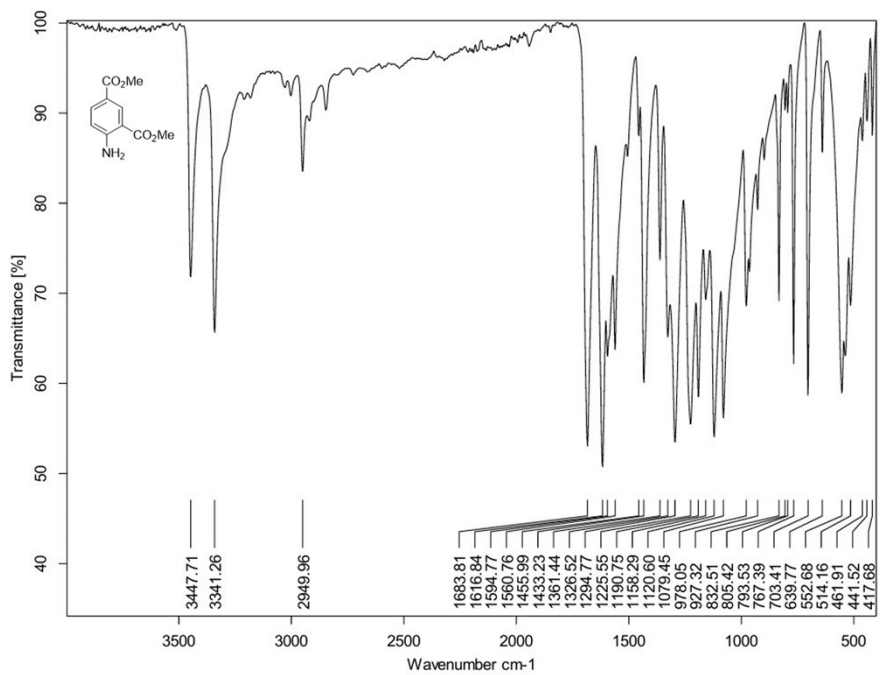

# Dimethyl 3,4-diaminophthalate (1E2E3A4A)

20240521.16.1.1r  
o-DB-3,4-proton

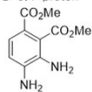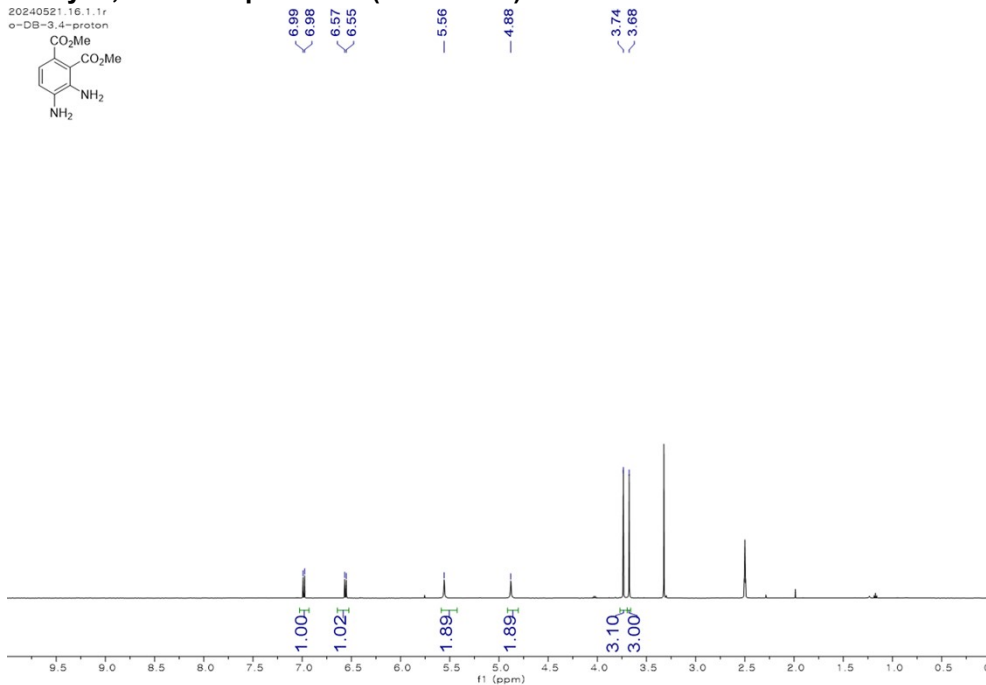

20240514.8.1.1r  
o-DB-3,4-carbon

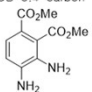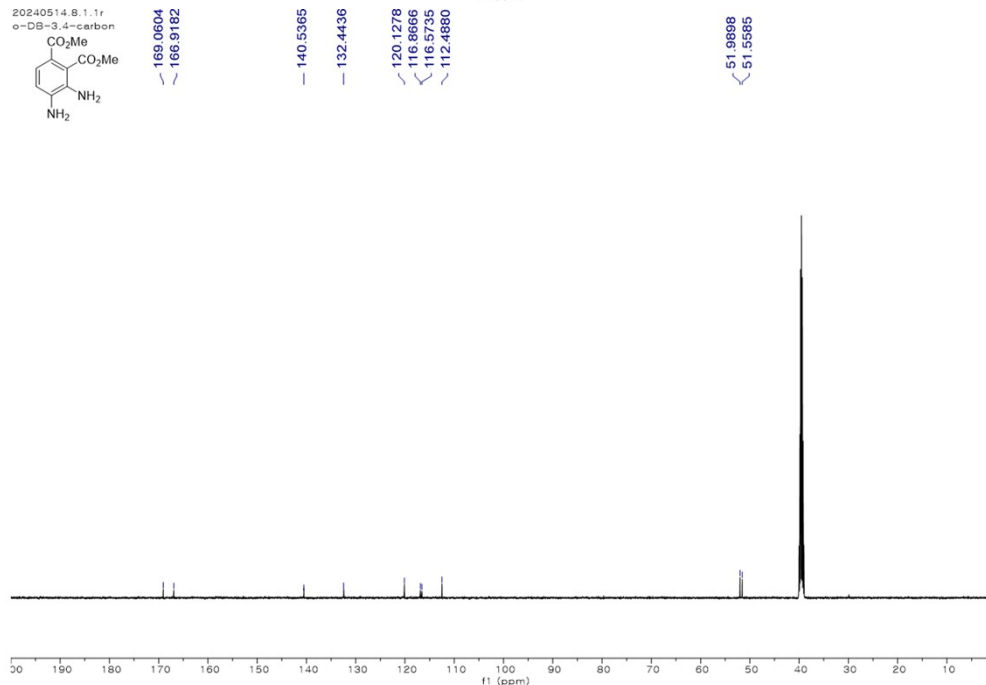

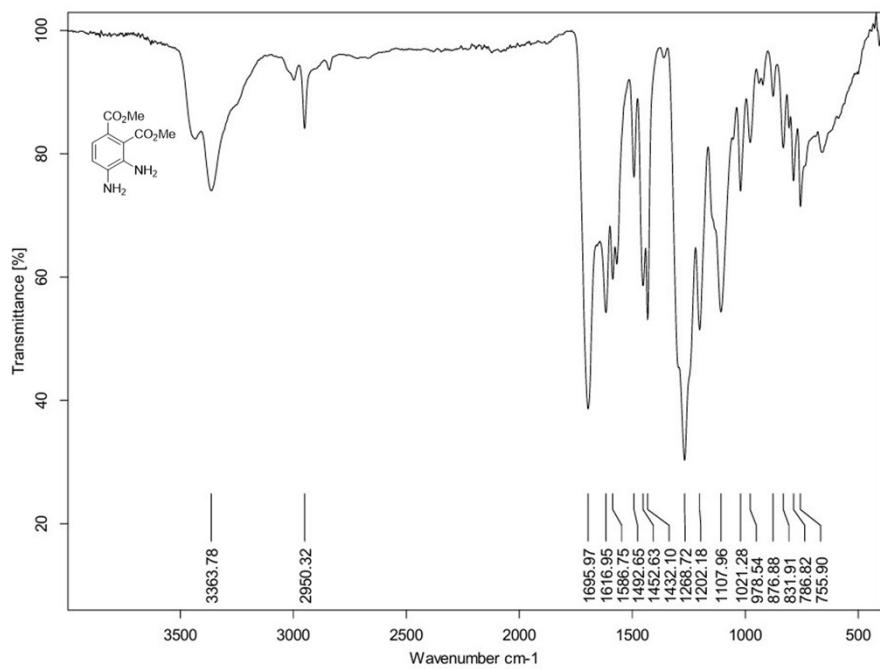

# Dimethyl 3,5-diaminophthalate (1E2E3A5A)

20240514.7.1.1r  
o-DB-3.5

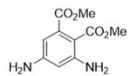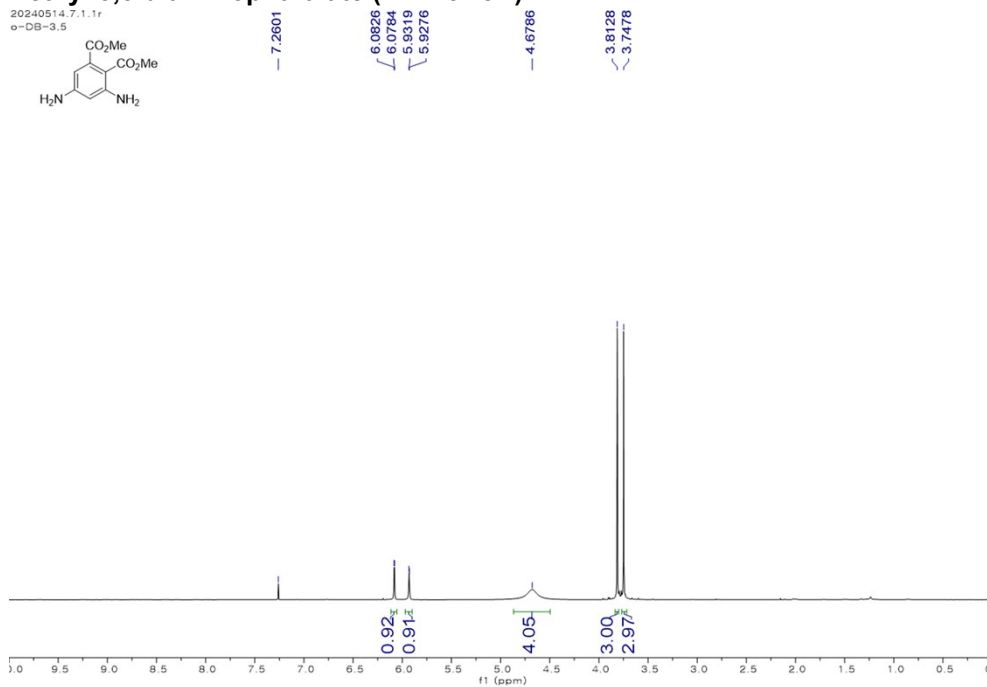

20240514.9.1.1r  
o-DB-3.5-carbon

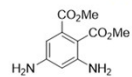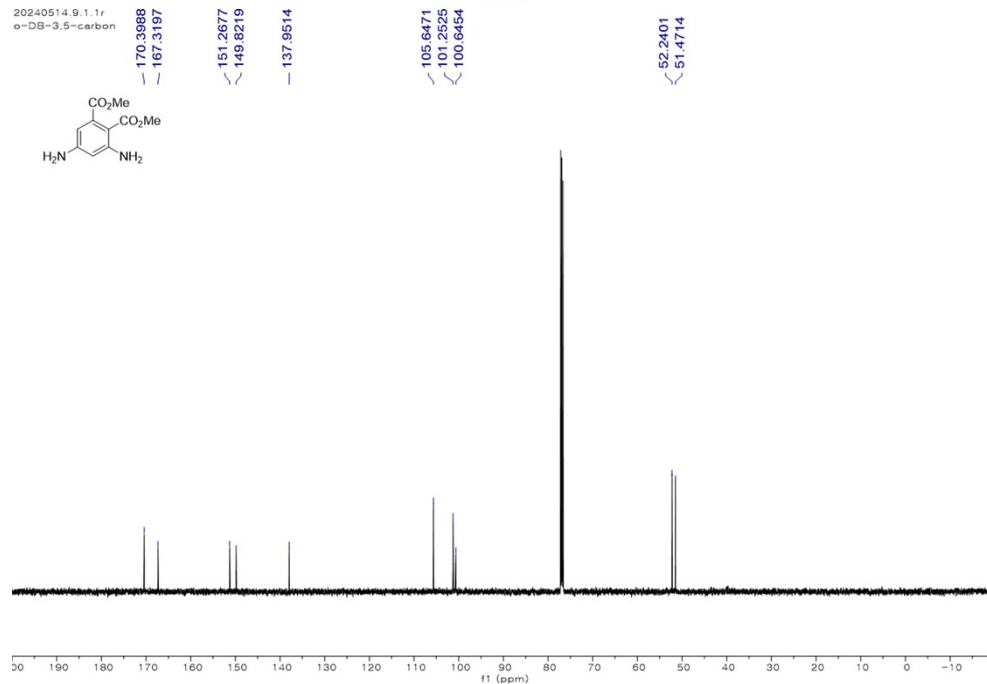



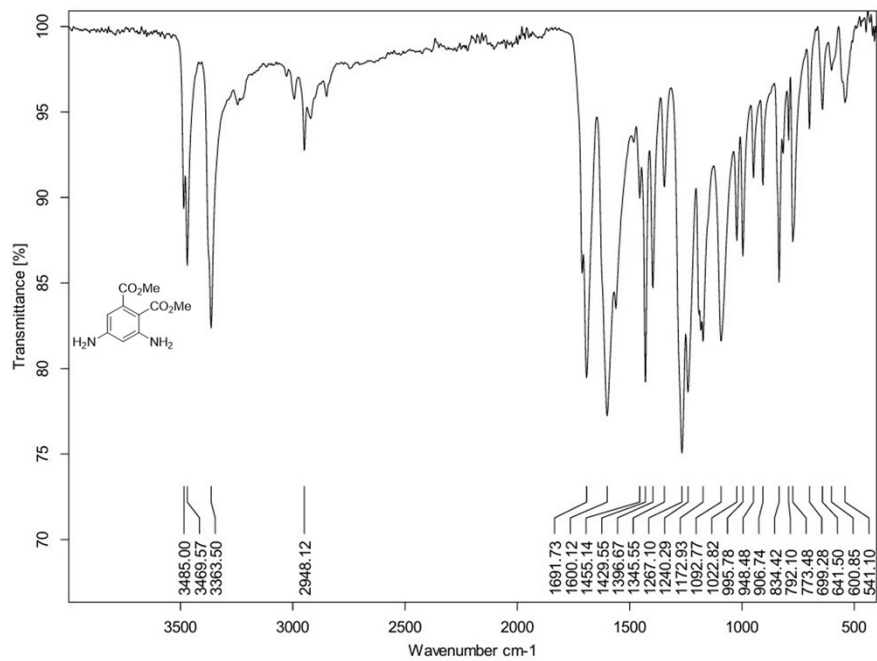

# Dimethyl 3,6-diaminophthalate (1E2E3A6A)

20240514.12.1.1.r  
o-DB-3.6

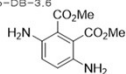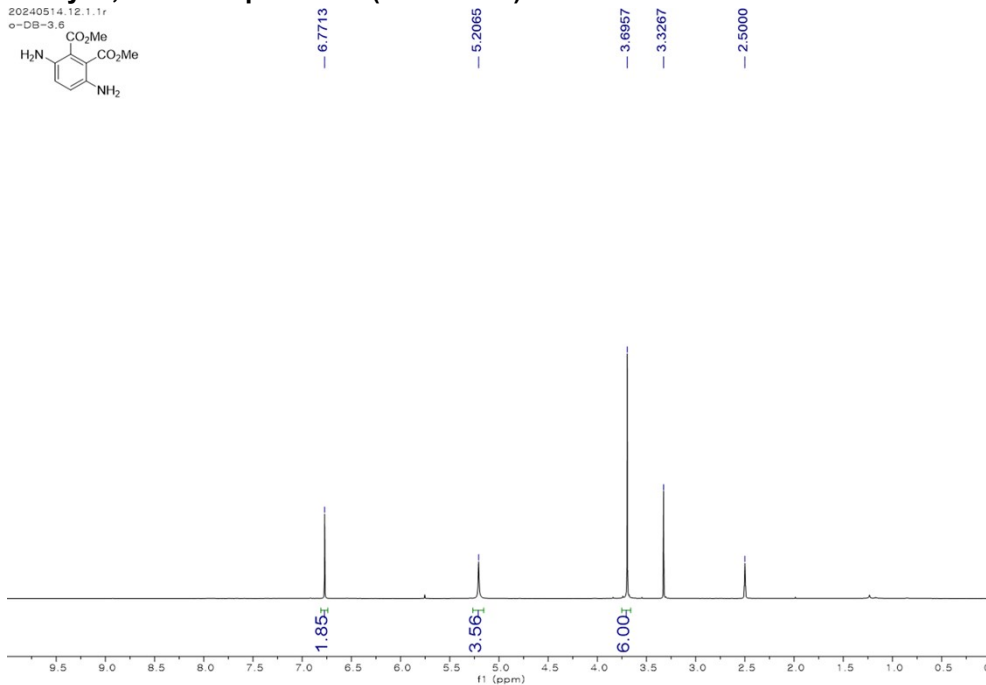

20240514.10.1.1.r  
o-DB-3.6-carbon

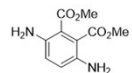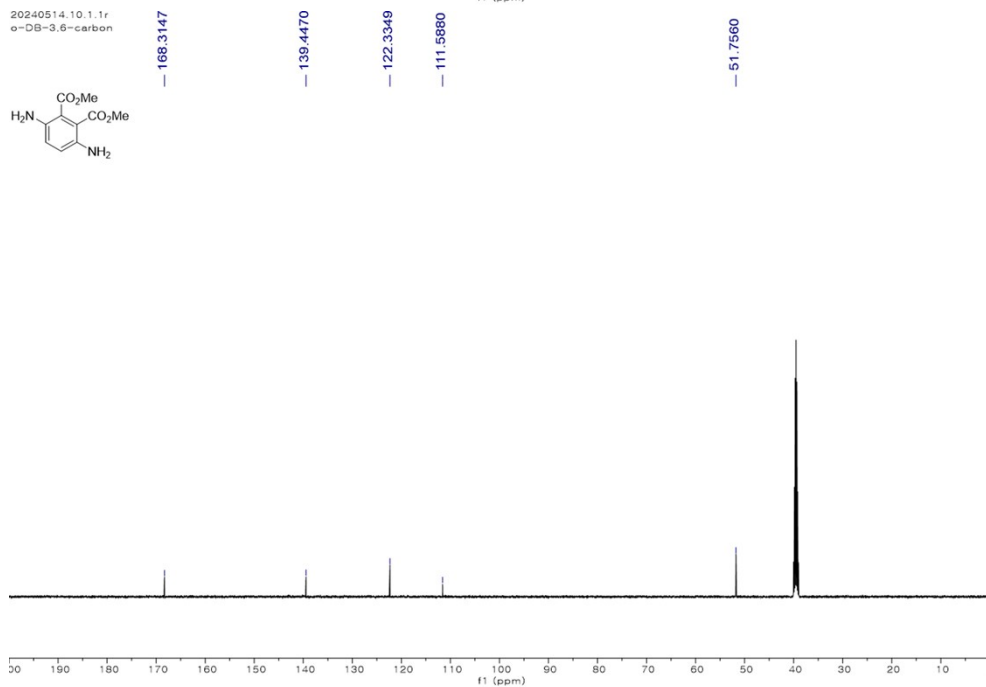

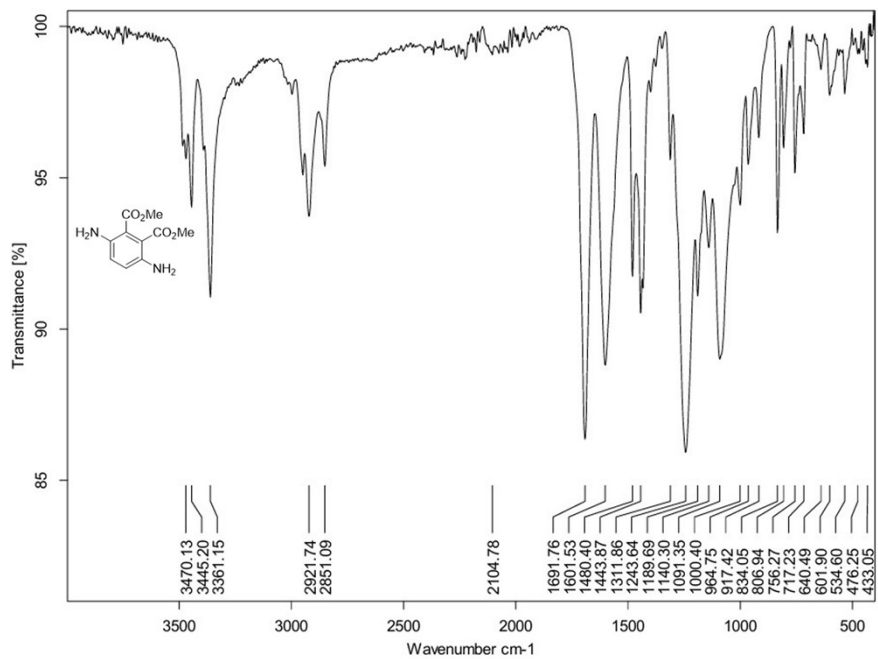

# Dimethyl 4,5-diaminophthalate (1E2E4A5A)

20240514.9.1.1.r  
o-DB-4.5

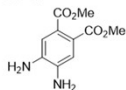

6.8050

5.2233

3.6871

3.3440

2.5000

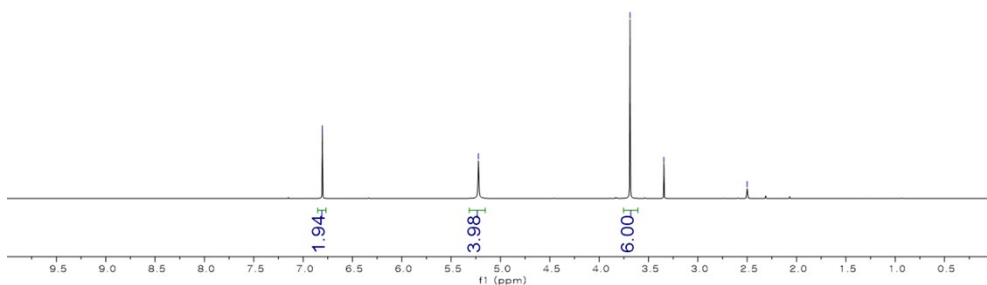

20240514.11.1.1.r  
o-DB-4.5-carbon

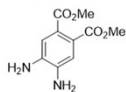

168.1921

136.9774

120.6015

113.5048

51.7196

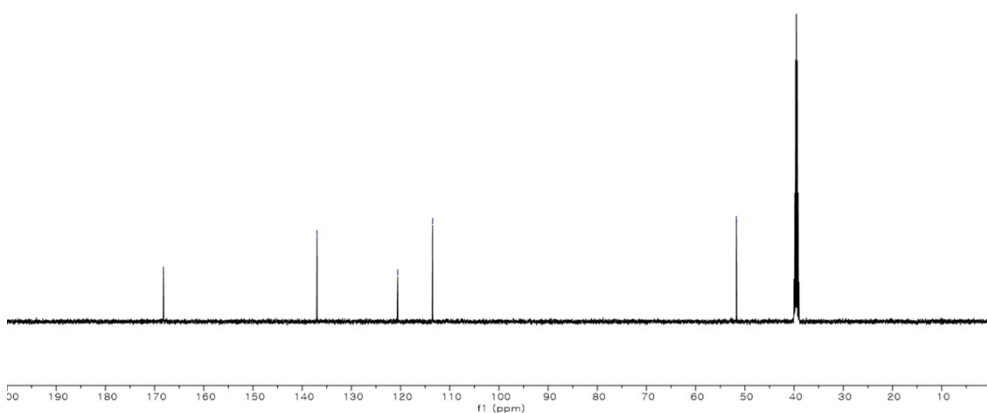

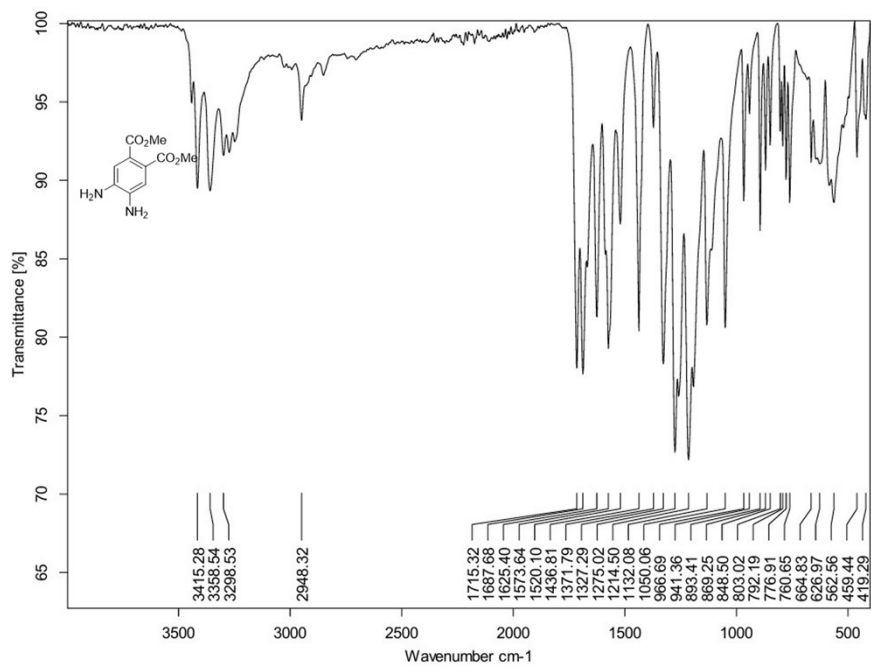

# Dimethyl 2,4-diaminoisophthalate (1E2A3E4A)

pdate/1  
m-DB-2,4-proton

8.2654  
7.6052  
7.5826  
7.1620  
5.8637  
5.8409  
3.8125  
3.6889

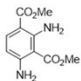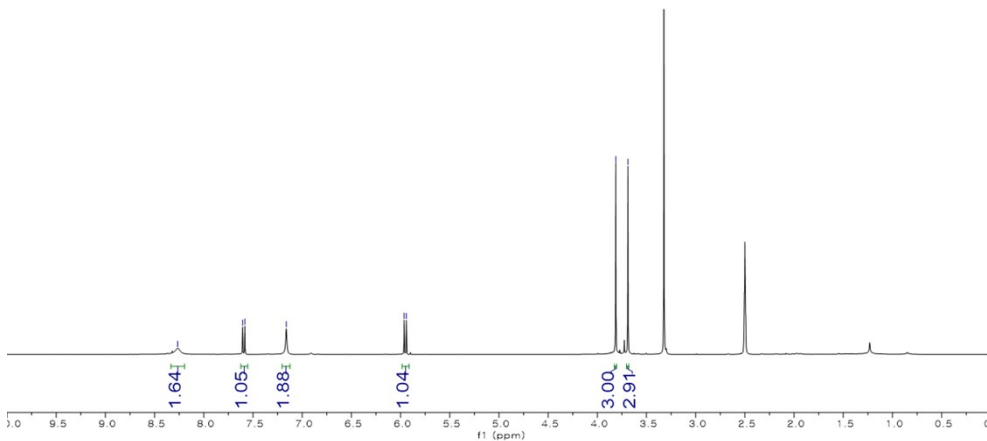

pdate/1  
m-DB-2,4-carbon

168.6219  
167.6535  
156.4874  
155.5356  
135.8445  
104.0358  
96.6685  
93.3609  
51.3614  
50.8274

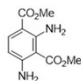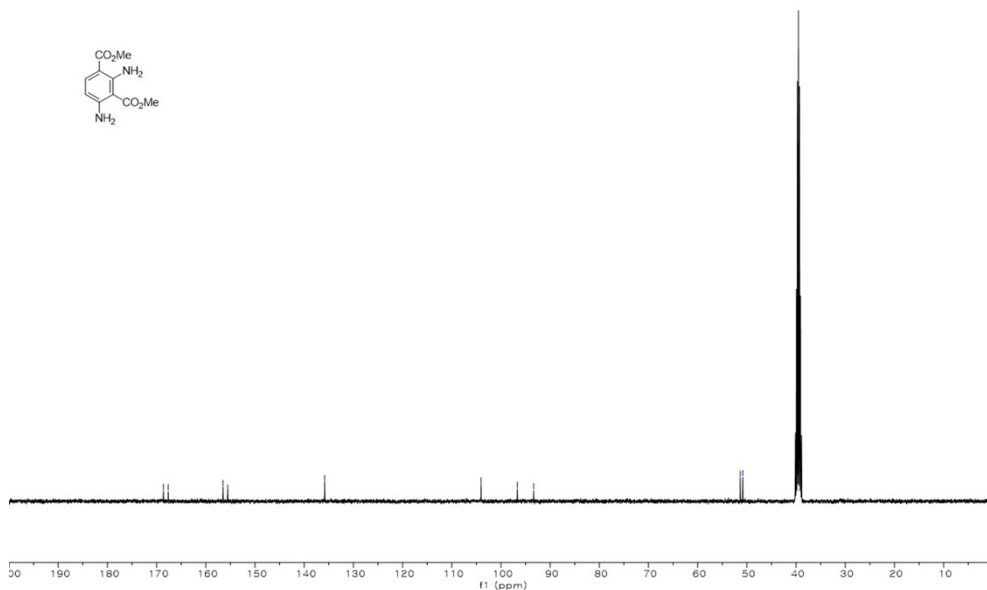

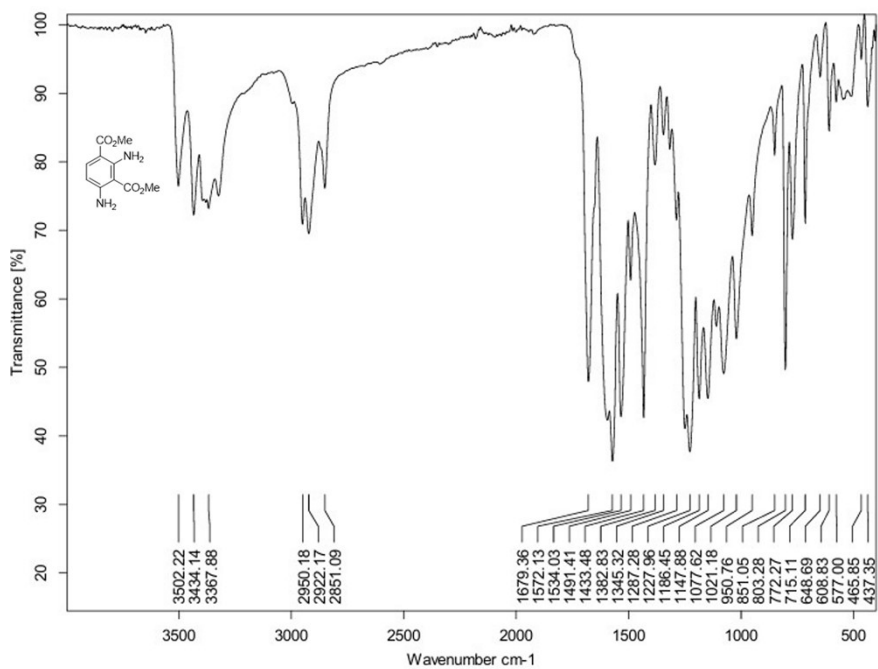

[Additional HPLC data to check purity of **1E2A3E4A**]

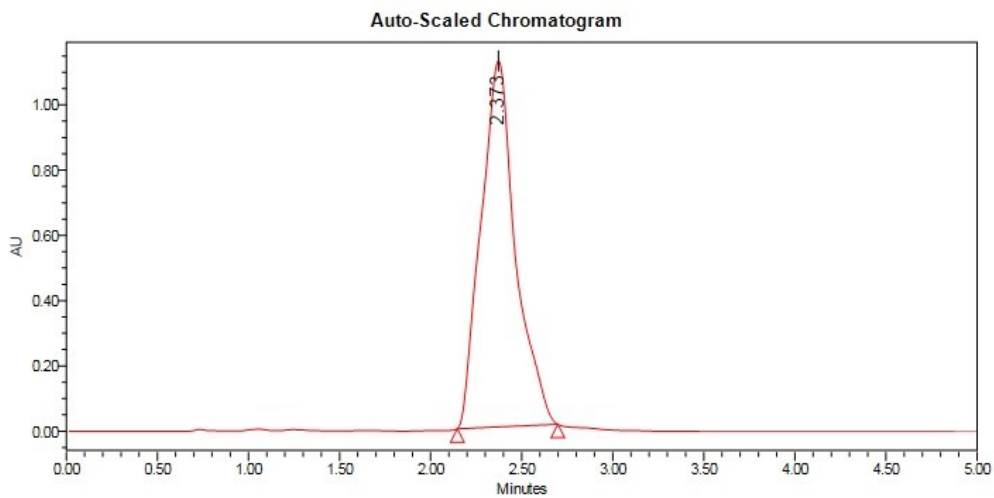

# Dimethyl 2,5-diaminoisophthalate (1E2A3E5A)

pdata/1  
m-DB-2.5-proton

7.4613  
7.3457  
7.3451

4.7526

3.7842

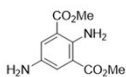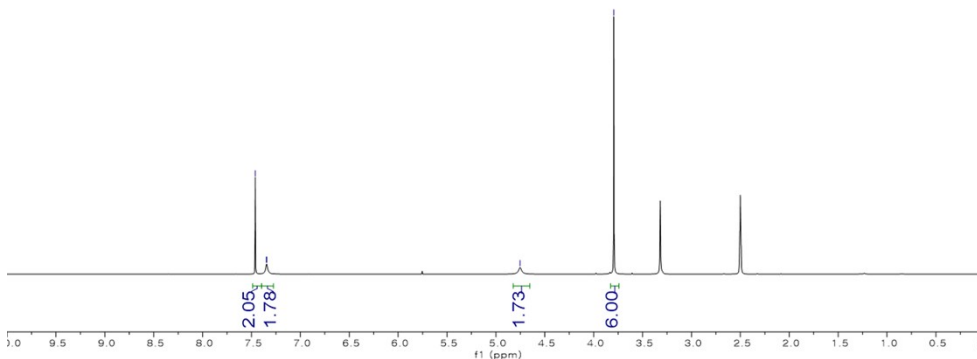

pdata/1  
m-DB-2.5-carbon

167.4789

144.9300

136.6834

123.1794

111.6357

51.6970

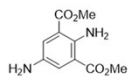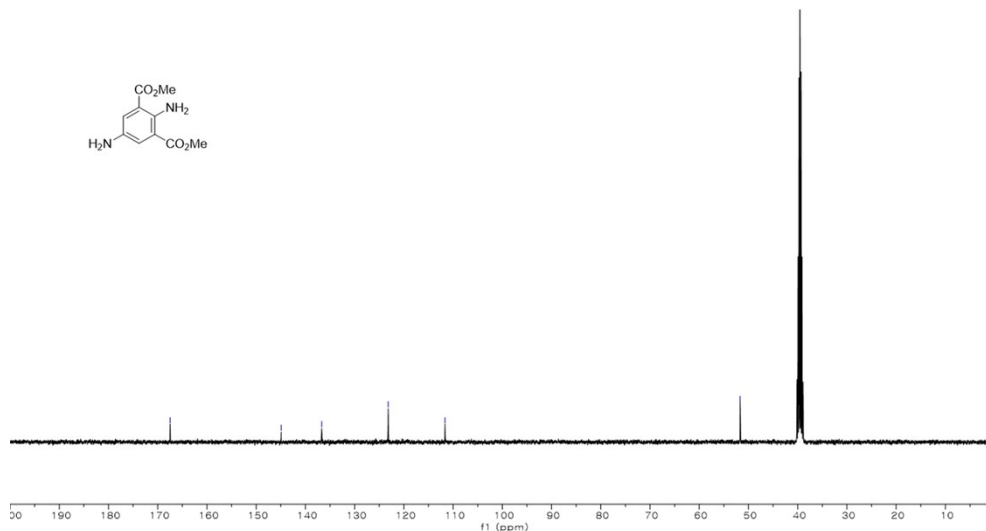



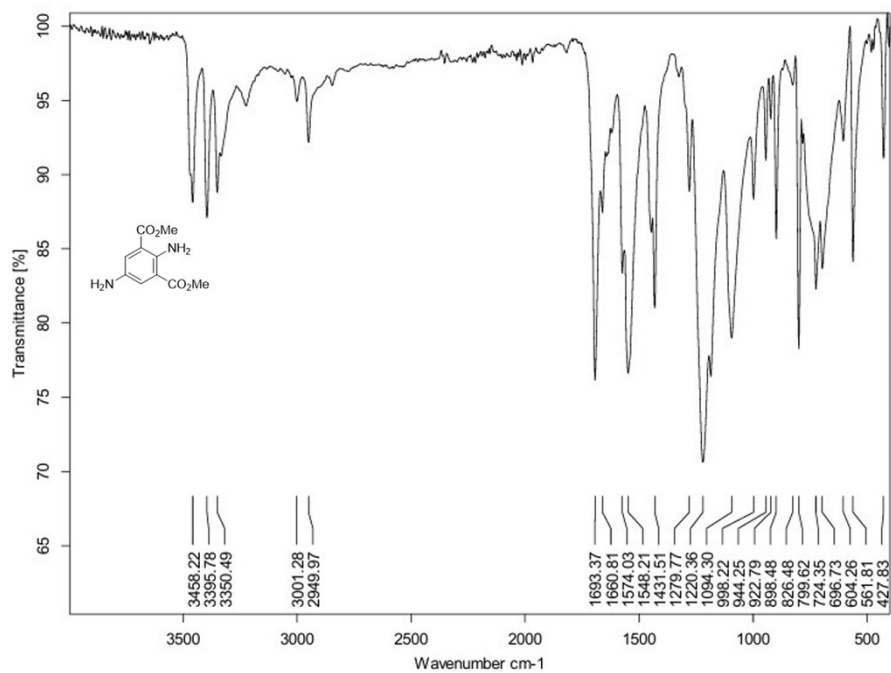

# Dimethyl 4,5-diaminoisophthalate (1E2A3A5E)

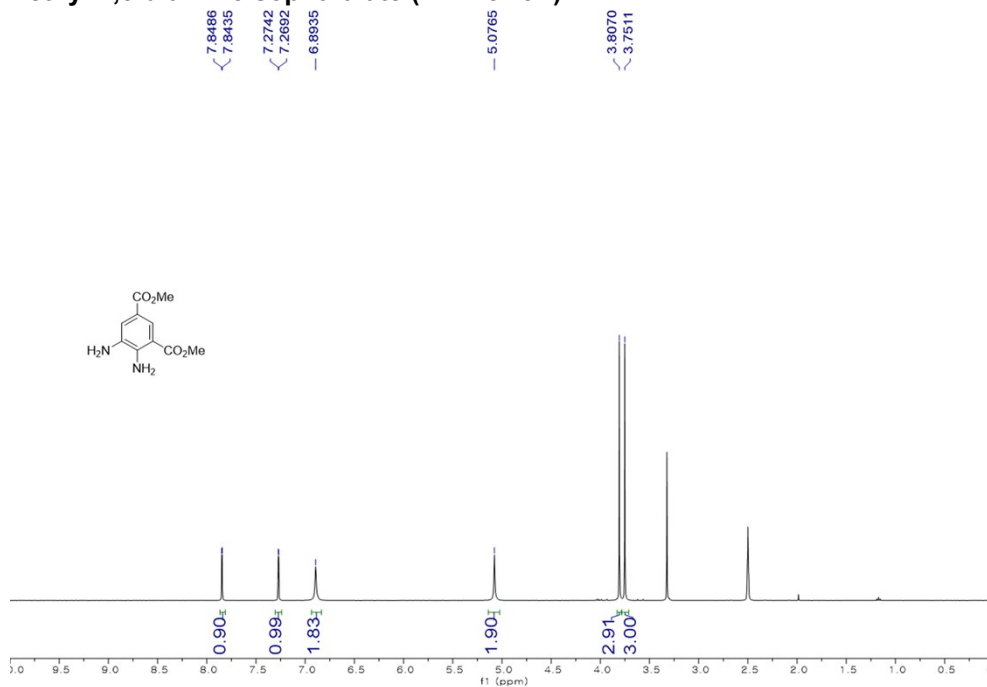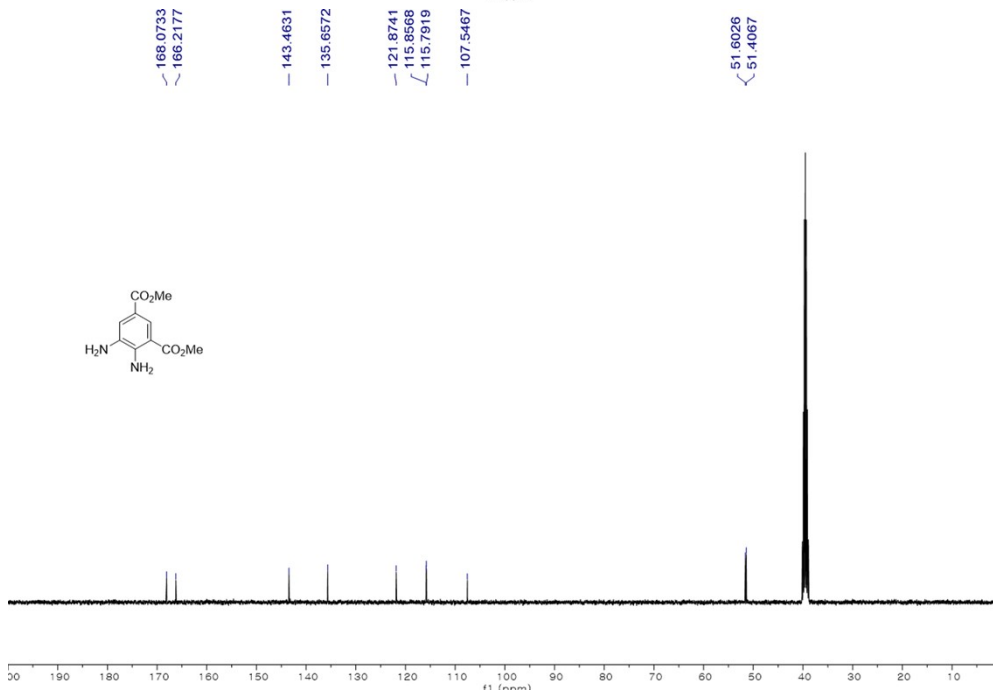

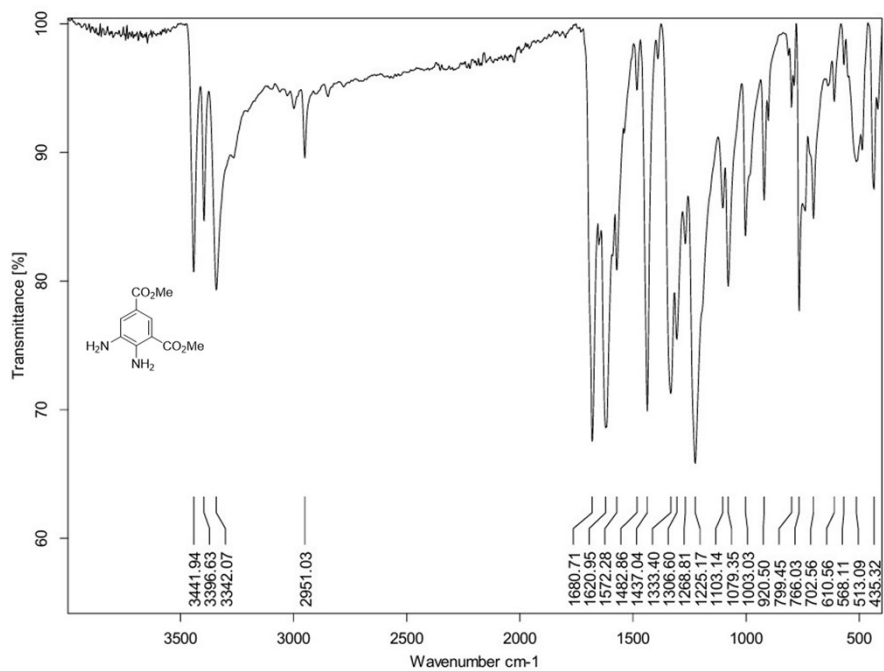

# Dimethyl 4,6-diaminoisophthalate (1E2A4A5E)

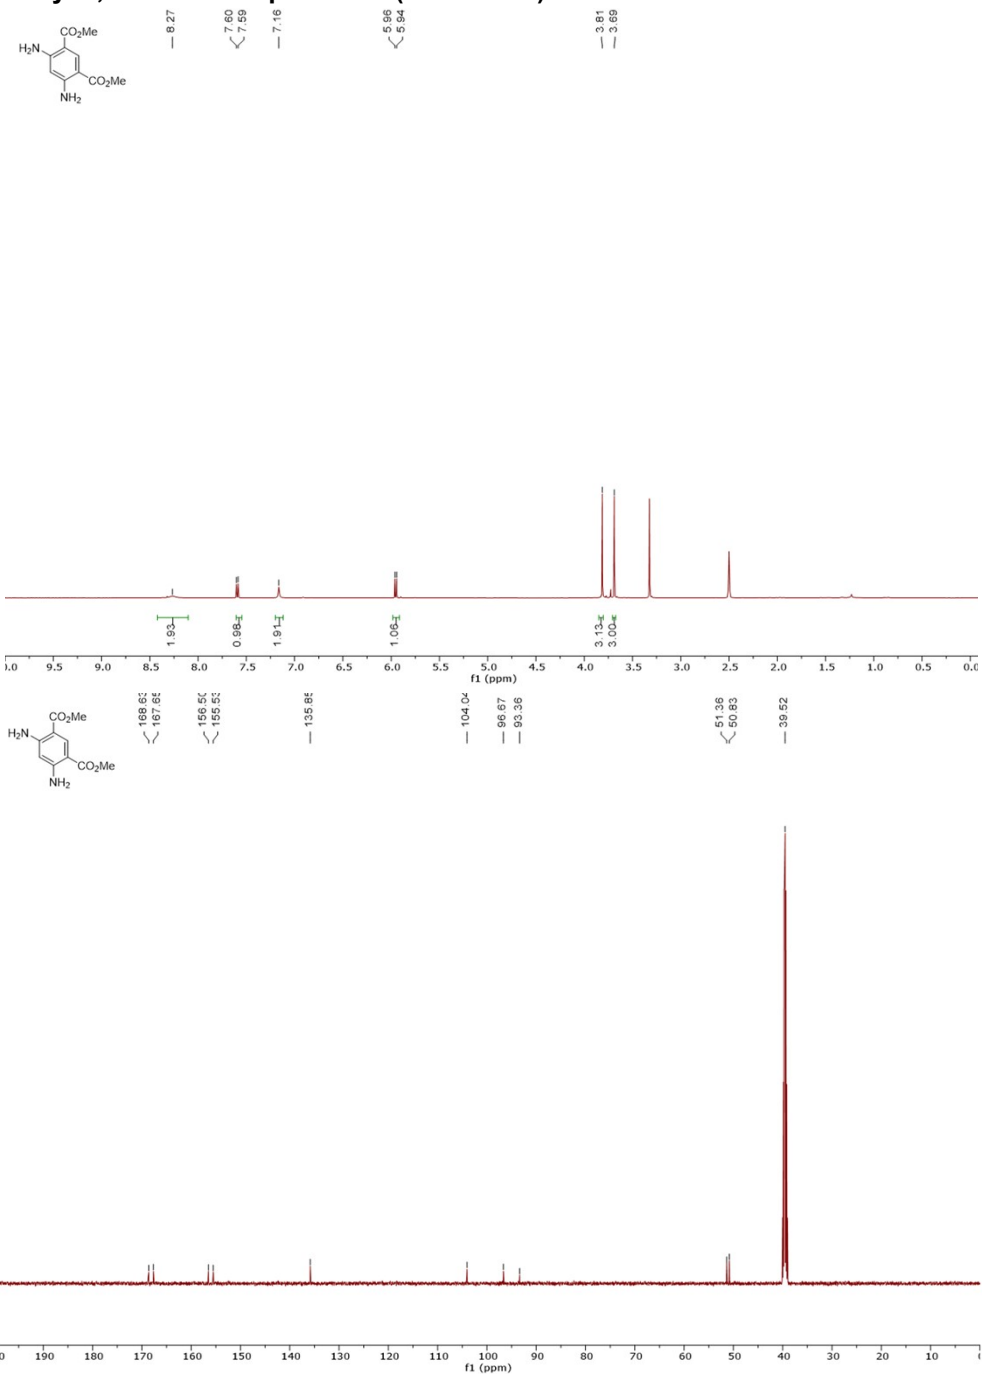

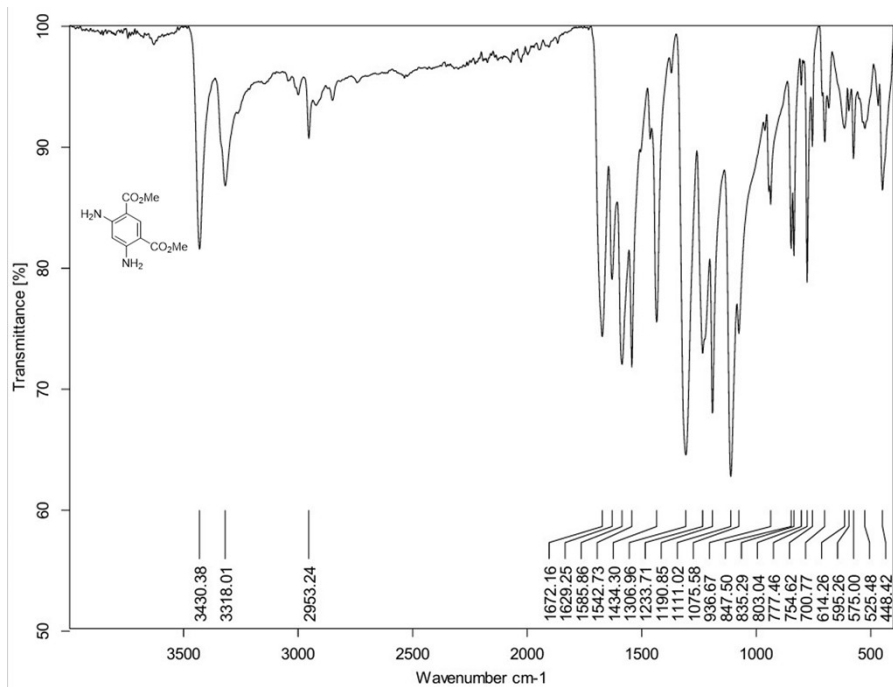

# Dimethyl 2,3-diaminoterephthalate (1E2A3A4E)

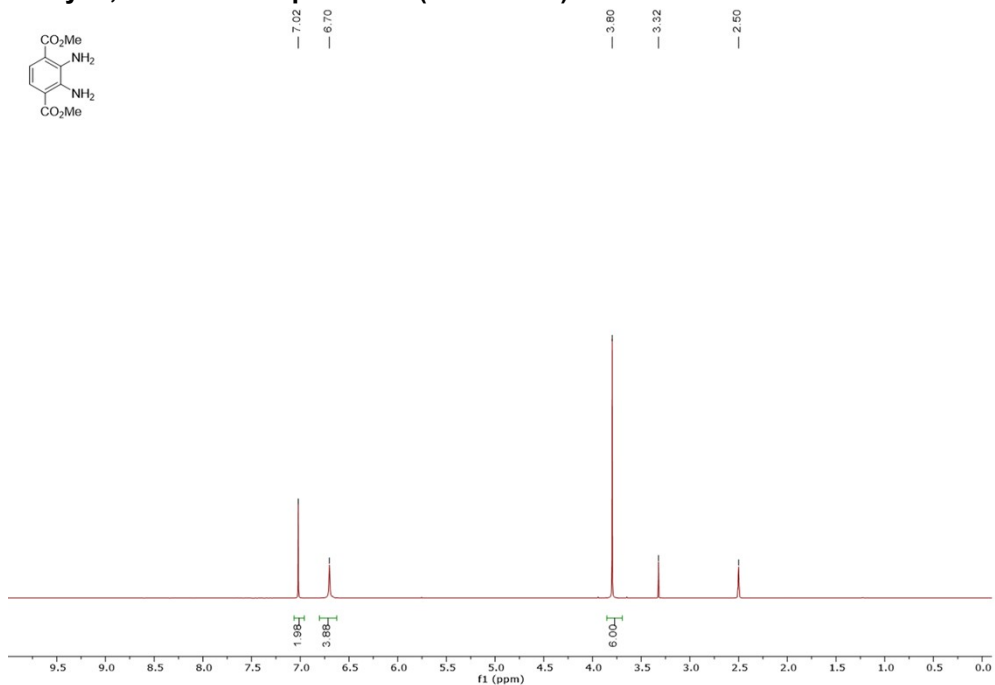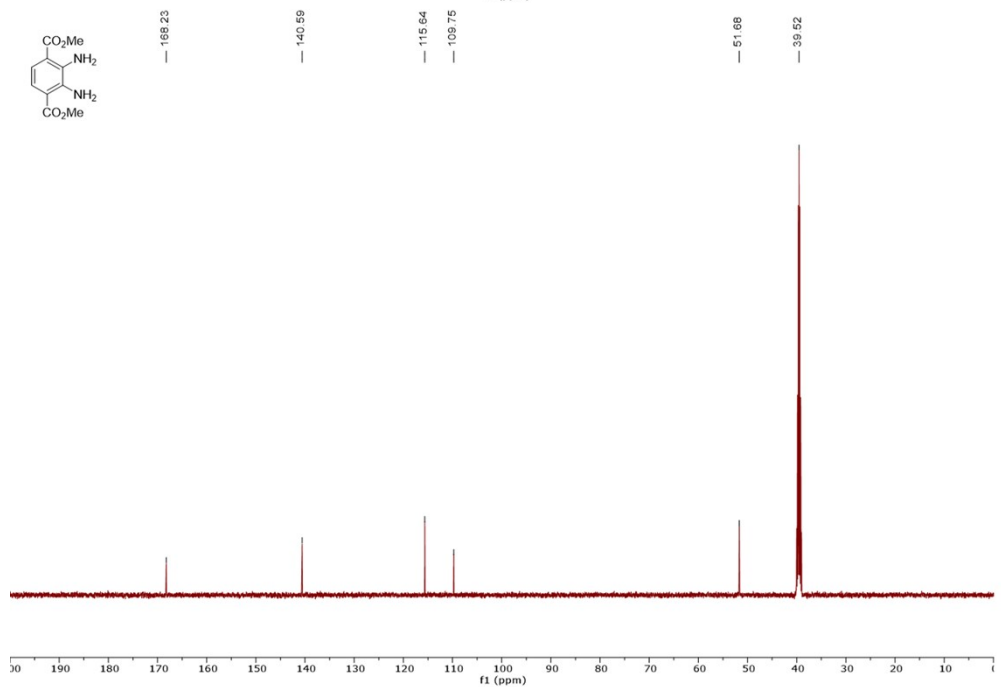

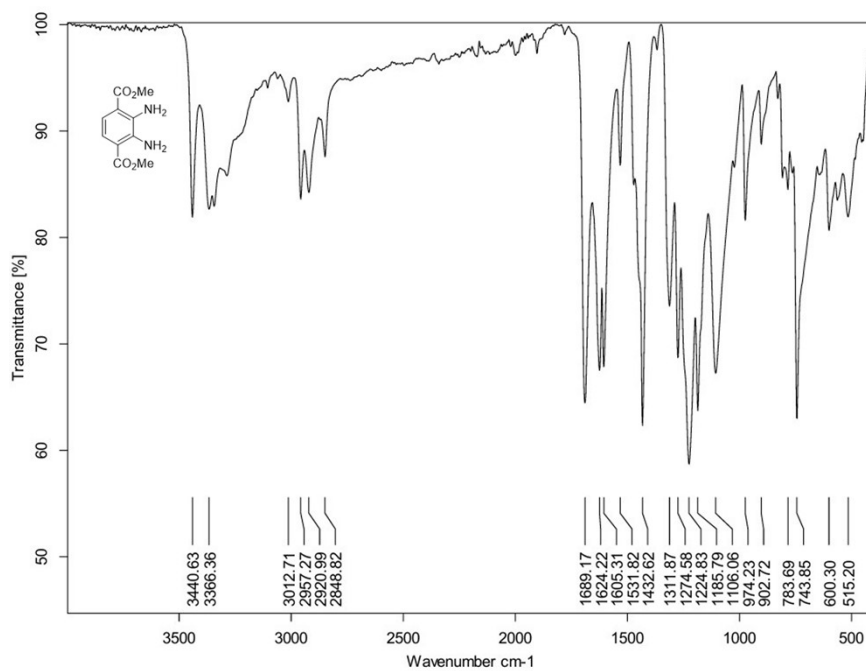

# Dimethyl 2,5-diaminoterephthalate (1E2A4E5A)

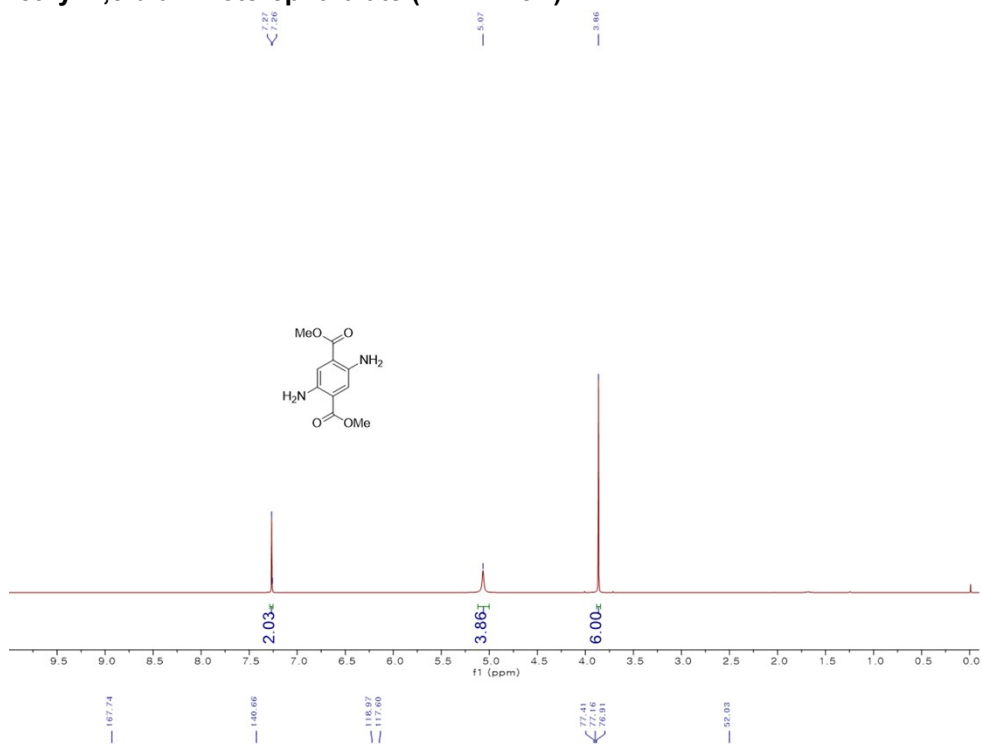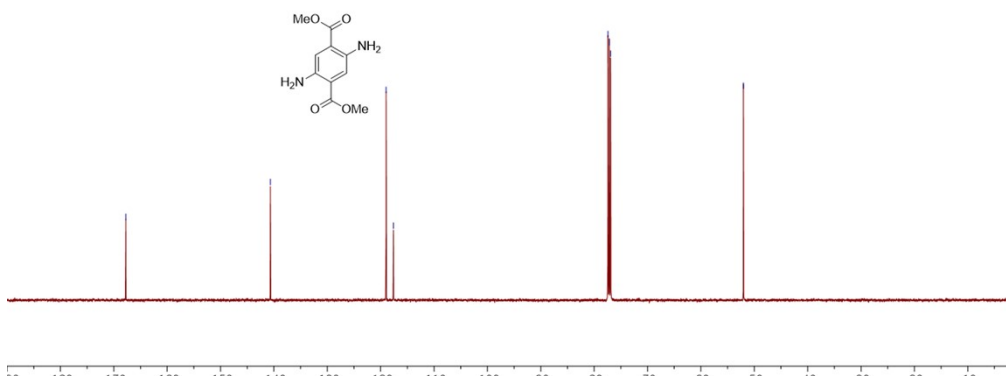



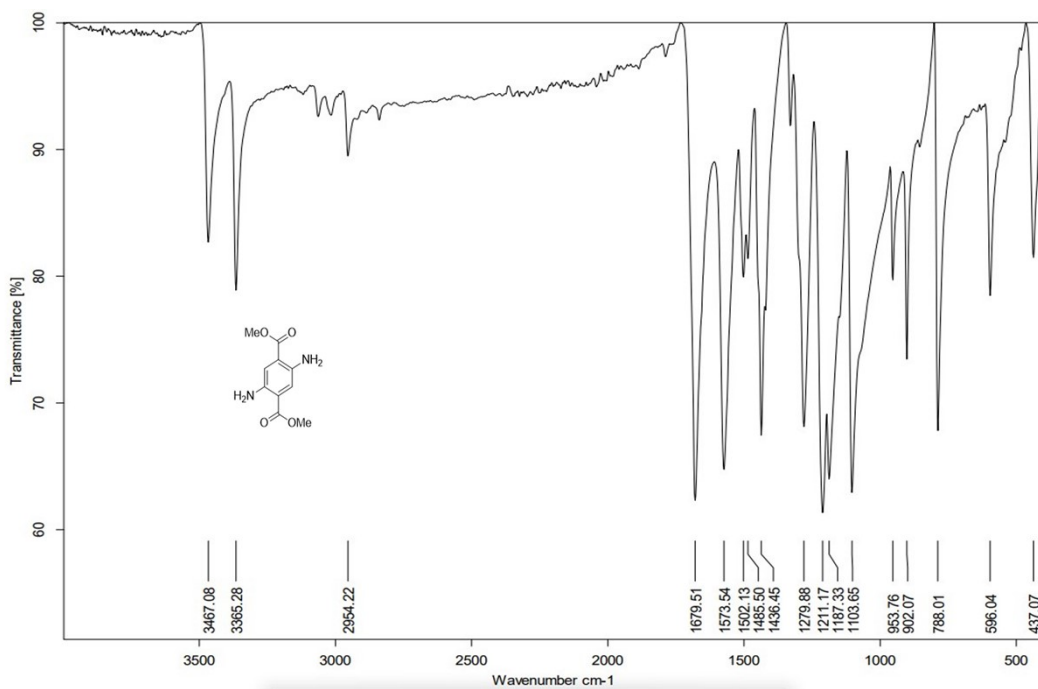

# Dimethyl 2,6-diaminoterephthalate (1E2A4E6A)

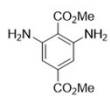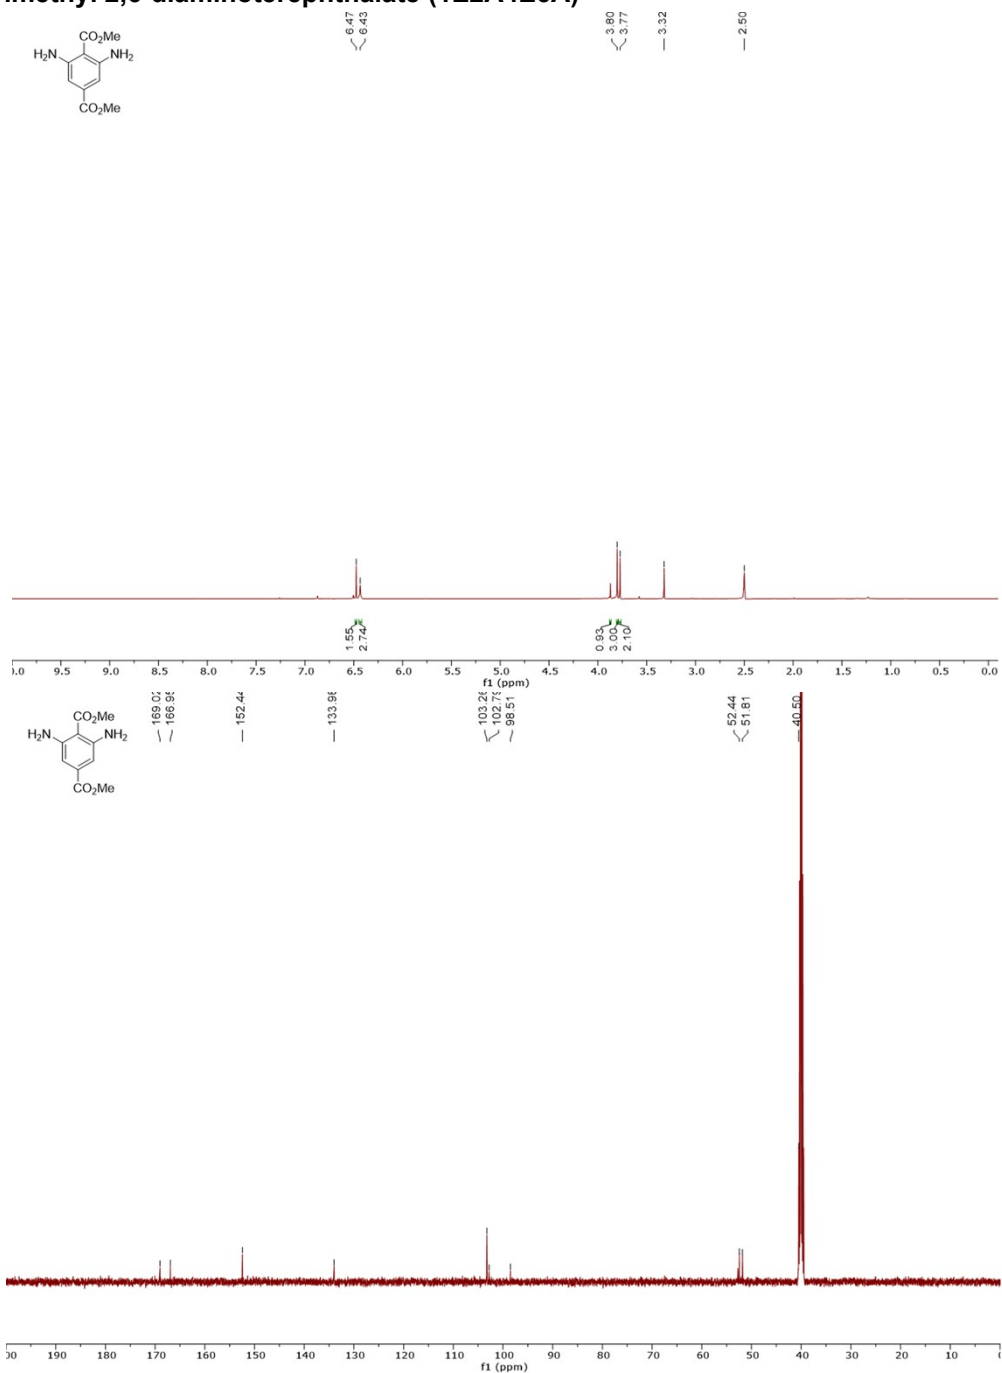

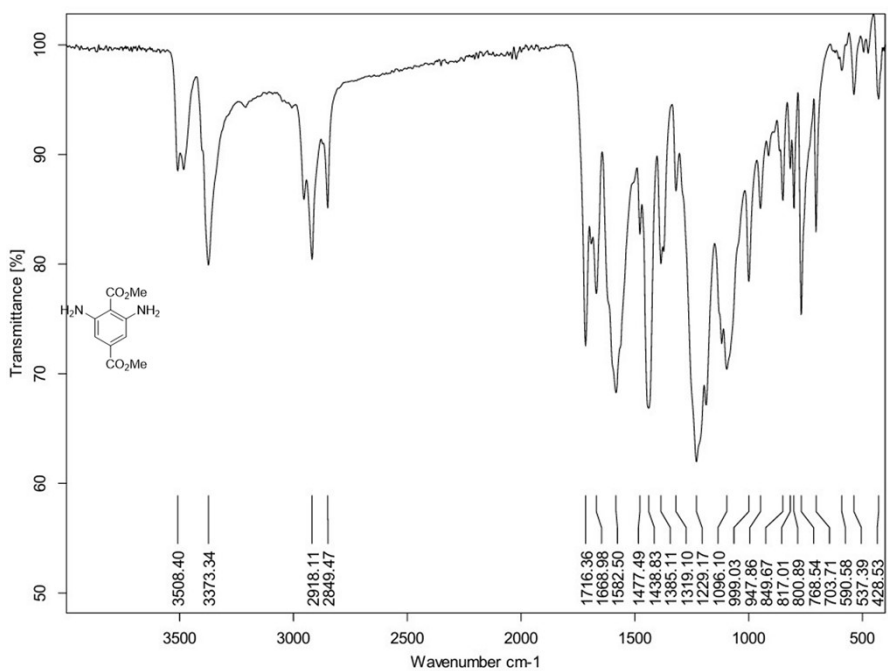

[Additional HPLC data to check purity of **1E2A4E6A**]

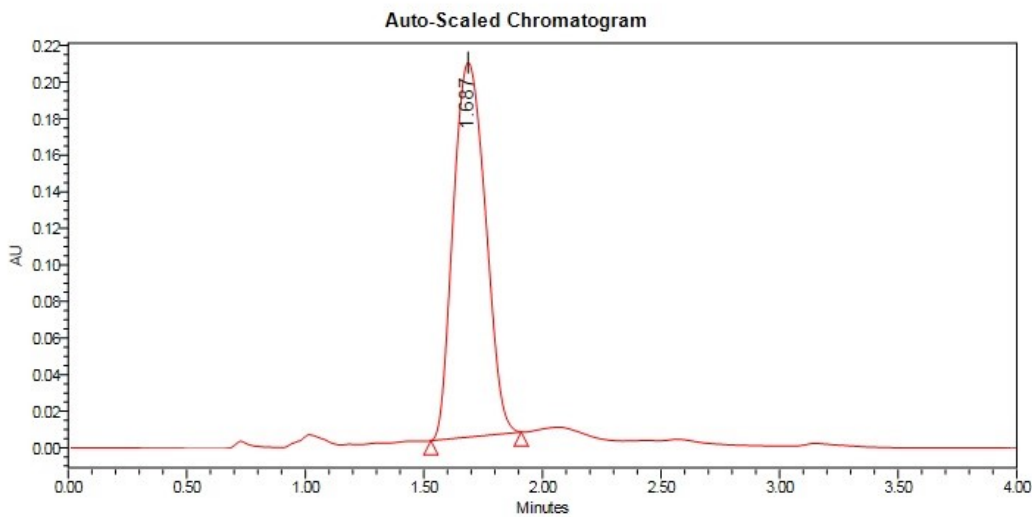

## ***Appendix II***

### **Crystal data for 1E2E4A**

**Table AP1.** Crystal data and structure refinement for **1E2E4A**

---

|                                              |                                                                                                                                           |
|----------------------------------------------|-------------------------------------------------------------------------------------------------------------------------------------------|
| _Empirical formula                           | C <sub>10</sub> H <sub>11</sub> N O <sub>4</sub>                                                                                          |
| Formula weight                               | 209.20                                                                                                                                    |
| Temperature                                  | 253(2) K                                                                                                                                  |
| Wavelength                                   | 0.71073 Å                                                                                                                                 |
| Crystal system                               | Triclinic                                                                                                                                 |
| Space group                                  | <i>P</i> -1                                                                                                                               |
| Unit cell dimensions                         | <i>a</i> = 8.831(6) Å, $\alpha$ = 73.42(2)°<br><i>b</i> = 9.067(6) Å, $\beta$ = 81.83(2)°<br><i>c</i> = 13.811(9) Å, $\gamma$ = 86.68(2)° |
| Volume                                       | 1049.0(12) Å <sup>3</sup>                                                                                                                 |
| Z                                            | 4                                                                                                                                         |
| Density (calculated)                         | 1.325 Mg/m <sup>3</sup>                                                                                                                   |
| Absorption coefficient                       | 0.104 mm <sup>-1</sup>                                                                                                                    |
| F(000)                                       | 440                                                                                                                                       |
| Crystal size                                 | 0.116 x 0.053 x 0.048 mm <sup>3</sup>                                                                                                     |
| Theta range for data collection              | 2.421 to 26.000°.                                                                                                                         |
| Index ranges                                 | -10 ≤ <i>h</i> ≤ 10, -11 ≤ <i>k</i> ≤ 11, -16 ≤ <i>l</i> ≤ 16                                                                             |
| Reflections collected                        | 28678                                                                                                                                     |
| Independent reflections                      | 4081 [R(int) = 0.0880]                                                                                                                    |
| Completeness to theta = 25.242°              | 99.8 %                                                                                                                                    |
| Absorption correction                        | Semi-empirical from equivalents                                                                                                           |
| Max. and min. transmission                   | 0.7453 and 0.6624                                                                                                                         |
| Refinement method                            | Full-matrix least-squares on F <sup>2</sup>                                                                                               |
| Data / restraints / parameters               | 4081 / 0 / 287                                                                                                                            |
| Goodness-of-fit on F <sup>2</sup>            | 1.039                                                                                                                                     |
| Final R indices [ <i>I</i> > 2σ( <i>I</i> )] | R1 = 0.0491, wR2 = 0.1293                                                                                                                 |
| R indices (all data)                         | R1 = 0.0828, wR2 = 0.1530                                                                                                                 |
| Largest diff. peak and hole                  | 0.217 and -0.212 e·Å <sup>-3</sup>                                                                                                        |

---

**Table AP2.** Atomic coordinates ( $\times 10^4$ ) and equivalent isotropic displacement parameters ( $\text{\AA}^2 \times 10^3$ ) for **1E2E4A** U(eq) is defined as one third of the trace of the orthogonalized  $U_{ij}$  tensor.

|       | x       | y        | z        | U(eq) |
|-------|---------|----------|----------|-------|
| N(1)  | 226(2)  | 7870(2)  | 1520(1)  | 61(1) |
| C(2)  | 807(2)  | 7269(2)  | 2422(1)  | 45(1) |
| C(3)  | 709(2)  | 5690(2)  | 2942(1)  | 48(1) |
| C(4)  | 1322(2) | 5102(2)  | 3841(1)  | 45(1) |
| C(5)  | 2037(2) | 6052(2)  | 4277(1)  | 42(1) |
| C(6)  | 2093(2) | 7644(2)  | 3778(1)  | 43(1) |
| C(7)  | 1496(2) | 8236(2)  | 2863(1)  | 47(1) |
| C(8)  | 2781(2) | 5428(2)  | 5208(1)  | 45(1) |
| O(9)  | 3507(2) | 6189(2)  | 5567(1)  | 69(1) |
| O(10) | 2592(2) | 3909(2)  | 5614(1)  | 54(1) |
| C(11) | 3268(3) | 3223(3)  | 6540(2)  | 61(1) |
| C(12) | 2738(2) | 8801(2)  | 4194(2)  | 49(1) |
| O(13) | 3938(2) | 9450(2)  | 3845(1)  | 63(1) |
| O(14) | 1750(2) | 9117(2)  | 4939(1)  | 64(1) |
| C(15) | 2225(3) | 10266(3) | 5379(2)  | 77(1) |
| N(21) | 5295(3) | 7138(3)  | 6937(2)  | 66(1) |
| C(22) | 5868(2) | 6525(2)  | 7841(1)  | 48(1) |
| C(23) | 5950(2) | 4937(2)  | 8299(2)  | 51(1) |
| C(24) | 6575(2) | 4362(2)  | 9194(2)  | 49(1) |
| C(25) | 7127(2) | 5338(2)  | 9690(1)  | 43(1) |
| C(26) | 6983(2) | 6940(2)  | 9251(1)  | 43(1) |
| C(27) | 6390(2) | 7517(2)  | 8340(1)  | 47(1) |
| C(28) | 7851(2) | 4739(2)  | 10625(2) | 46(1) |
| O(29) | 8416(2) | 5534(2)  | 11047(1) | 65(1) |
| O(30) | 7844(2) | 3197(2)  | 10975(1) | 62(1) |
| C(31) | 8566(3) | 2534(3)  | 11885(2) | 70(1) |
| C(32) | 7398(2) | 8117(2)  | 9745(2)  | 48(1) |
| O(33) | 8527(2) | 8898(2)  | 9466(1)  | 70(1) |
| O(34) | 6288(2) | 8286(2)  | 10476(1) | 59(1) |
| C(35) | 6517(3) | 9465(3)  | 10960(2) | 73(1) |

**Table AP3.** Bond lengths [Å] and angles [°] for **1E2E4A**

|                  |            |                     |            |
|------------------|------------|---------------------|------------|
| N(1)-C(2)        | 1.368(2)   | N(21)-C(22)         | 1.369(3)   |
| N(1)-H(1A)       | 0.89(3)    | N(21)-H(21A)        | 0.82(3)    |
| N(1)-H(1B)       | 0.85(3)    | N(21)-H(21B)        | 0.91(3)    |
| C(2)-C(7)        | 1.408(3)   | C(22)-C(23)         | 1.400(3)   |
| C(2)-C(3)        | 1.409(3)   | C(22)-C(27)         | 1.410(3)   |
| C(3)-C(4)        | 1.378(3)   | C(23)-C(24)         | 1.377(3)   |
| C(3)-H(3)        | 0.9400     | C(23)-H(23)         | 0.9400     |
| C(4)-C(5)        | 1.404(2)   | C(24)-C(25)         | 1.408(2)   |
| C(4)-H(4)        | 0.9400     | C(24)-H(24)         | 0.9400     |
| C(5)-C(6)        | 1.411(3)   | C(25)-C(26)         | 1.411(3)   |
| C(5)-C(8)        | 1.479(2)   | C(25)-C(28)         | 1.471(3)   |
| C(6)-C(7)        | 1.390(3)   | C(26)-C(27)         | 1.382(3)   |
| C(6)-C(12)       | 1.505(3)   | C(26)-C(32)         | 1.506(3)   |
| C(7)-H(7)        | 0.9400     | C(27)-H(27)         | 0.9400     |
| C(8)-O(9)        | 1.212(2)   | C(28)-O(29)         | 1.214(2)   |
| C(8)-O(10)       | 1.341(2)   | C(28)-O(30)         | 1.342(2)   |
| O(10)-C(11)      | 1.448(2)   | O(30)-C(31)         | 1.449(3)   |
| C(11)-H(11A)     | 0.9700     | C(31)-H(31A)        | 0.9700     |
| C(11)-H(11B)     | 0.9700     | C(31)-H(31B)        | 0.9700     |
| C(11)-H(11C)     | 0.9700     | C(31)-H(31C)        | 0.9700     |
| C(12)-O(13)      | 1.211(3)   | C(32)-O(33)         | 1.209(2)   |
| C(12)-O(14)      | 1.337(3)   | C(32)-O(34)         | 1.339(3)   |
| O(14)-C(15)      | 1.454(2)   | O(34)-C(35)         | 1.449(2)   |
| C(15)-H(15A)     | 0.9700     | C(35)-H(35A)        | 0.9700     |
| C(15)-H(15B)     | 0.9700     | C(35)-H(35B)        | 0.9700     |
| C(15)-H(15C)     | 0.9700     | C(35)-H(35C)        | 0.9700     |
| C(2)-N(1)-H(1A)  | 116.9(18)  | C(7)-C(6)-C(5)      | 120.48(17) |
| C(2)-N(1)-H(1B)  | 116.5(18)  | C(7)-C(6)-C(12)     | 115.86(17) |
| H(1A)-N(1)-H(1B) | 125(3)     | C(5)-C(6)-C(12)     | 123.64(16) |
| N(1)-C(2)-C(7)   | 120.23(19) | C(6)-C(7)-C(2)      | 120.89(19) |
| N(1)-C(2)-C(3)   | 121.47(17) | C(6)-C(7)-H(7)      | 119.6      |
| C(7)-C(2)-C(3)   | 118.29(17) | C(2)-C(7)-H(7)      | 119.6      |
| C(4)-C(3)-C(2)   | 120.66(17) | O(9)-C(8)-O(10)     | 122.88(18) |
| C(4)-C(3)-H(3)   | 119.7      | O(9)-C(8)-C(5)      | 124.30(19) |
| C(2)-C(3)-H(3)   | 119.7      | O(10)-C(8)-C(5)     | 112.81(16) |
| C(3)-C(4)-C(5)   | 121.45(19) | C(8)-O(10)-C(11)    | 115.88(16) |
| C(3)-C(4)-H(4)   | 119.3      | O(10)-C(11)-H(11A)  | 109.5      |
| C(5)-C(4)-H(4)   | 119.3      | O(10)-C(11)-H(11B)  | 109.5      |
| C(4)-C(5)-C(6)   | 118.17(17) | H(11A)-C(11)-H(11B) | 109.5      |
| C(4)-C(5)-C(8)   | 122.17(18) | O(10)-C(11)-H(11C)  | 109.5      |

|                     |            |                     |            |
|---------------------|------------|---------------------|------------|
| C(6)-C(5)-C(8)      | 119.60(16) | H(11A)-C(11)-H(11C) | 109.5      |
| H(11B)-C(11)-H(11C) | 109.5      | O(30)-C(31)-H(31B)  | 109.5      |
| O(13)-C(12)-O(14)   | 124.44(19) | H(31A)-C(31)-H(31B) | 109.5      |
| O(13)-C(12)-C(6)    | 124.4(2)   | O(30)-C(31)-H(31C)  | 109.5      |
| O(14)-C(12)-C(6)    | 110.94(19) | H(31A)-C(31)-H(31C) | 109.5      |
| C(12)-O(14)-C(15)   | 116.02(19) | H(31B)-C(31)-H(31C) | 109.5      |
| O(14)-C(15)-H(15A)  | 109.5      | O(33)-C(32)-O(34)   | 123.90(19) |
| O(14)-C(15)-H(15B)  | 109.5      | O(33)-C(32)-C(26)   | 124.6(2)   |
| H(15A)-C(15)-H(15B) | 109.5      | O(34)-C(32)-C(26)   | 111.26(18) |
| O(14)-C(15)-H(15C)  | 109.5      | C(32)-O(34)-C(35)   | 116.16(19) |
| H(15A)-C(15)-H(15C) | 109.5      | O(34)-C(35)-H(35A)  | 109.5      |
| H(15B)-C(15)-H(15C) | 109.5      | O(34)-C(35)-H(35B)  | 109.5      |
| C(22)-N(21)-H(21A)  | 121(2)     | H(35A)-C(35)-H(35B) | 109.5      |
| C(22)-N(21)-H(21B)  | 120.7(18)  | O(34)-C(35)-H(35C)  | 109.5      |
| H(21A)-N(21)-H(21B) | 118(3)     | H(35A)-C(35)-H(35C) | 109.5      |
| N(21)-C(22)-C(23)   | 122.36(19) | H(35B)-C(35)-H(35C) | 109.5      |
| N(21)-C(22)-C(27)   | 119.4(2)   |                     |            |
| C(23)-C(22)-C(27)   | 118.23(18) |                     |            |
| C(24)-C(23)-C(22)   | 120.68(18) |                     |            |
| C(24)-C(23)-H(23)   | 119.7      |                     |            |
| C(22)-C(23)-H(23)   | 119.7      |                     |            |
| C(23)-C(24)-C(25)   | 121.67(19) |                     |            |
| C(23)-C(24)-H(24)   | 119.2      |                     |            |
| C(25)-C(24)-H(24)   | 119.2      |                     |            |
| C(24)-C(25)-C(26)   | 117.52(18) |                     |            |
| C(24)-C(25)-C(28)   | 122.20(18) |                     |            |
| C(26)-C(25)-C(28)   | 120.27(16) |                     |            |
| C(27)-C(26)-C(25)   | 120.79(17) |                     |            |
| C(27)-C(26)-C(32)   | 115.93(17) |                     |            |
| C(25)-C(26)-C(32)   | 123.24(16) |                     |            |
| C(26)-C(27)-C(22)   | 121.01(19) |                     |            |
| C(26)-C(27)-H(27)   | 119.5      |                     |            |
| C(22)-C(27)-H(27)   | 119.5      |                     |            |
| O(29)-C(28)-O(30)   | 122.21(19) |                     |            |
| O(29)-C(28)-C(25)   | 124.47(19) |                     |            |
| O(30)-C(28)-C(25)   | 113.32(16) |                     |            |
| C(28)-O(30)-C(31)   | 115.97(17) |                     |            |
| O(30)-C(31)-H(31A)  | 109.5      |                     |            |

---

Symmetry transformations used to generate equivalent atoms:

#1 -x+1,-y+2,-z+1      #2 x-1,y,z-



**Table AP4.** Anisotropic displacement parameters ( $\text{\AA}^2 \times 10^3$ ) for **1E2E4A** The anisotropic displacement factor exponent takes the form:  $-2\pi^2[h^2a^*U^{11} + \dots + 2hk a^* b^* U^{12}]$ .

|       | U <sup>11</sup> | U <sup>22</sup> | U <sup>33</sup> | U <sup>23</sup> | U <sup>13</sup> | U <sup>12</sup> |
|-------|-----------------|-----------------|-----------------|-----------------|-----------------|-----------------|
| N(1)  | 72(1)           | 58(1)           | 56(1)           | -9(1)           | -30(1)          | -14(1)          |
| C(2)  | 44(1)           | 50(1)           | 44(1)           | -14(1)          | -12(1)          | -3(1)           |
| C(3)  | 47(1)           | 54(1)           | 48(1)           | -20(1)          | -12(1)          | -8(1)           |
| C(4)  | 47(1)           | 43(1)           | 45(1)           | -13(1)          | -7(1)           | -6(1)           |
| C(5)  | 40(1)           | 47(1)           | 41(1)           | -16(1)          | -8(1)           | 0(1)            |
| C(6)  | 42(1)           | 45(1)           | 47(1)           | -18(1)          | -12(1)          | -1(1)           |
| C(7)  | 48(1)           | 46(1)           | 50(1)           | -12(1)          | -15(1)          | -2(1)           |
| C(8)  | 47(1)           | 46(1)           | 45(1)           | -16(1)          | -10(1)          | 0(1)            |
| O(9)  | 91(1)           | 58(1)           | 67(1)           | -15(1)          | -43(1)          | -7(1)           |
| O(10) | 66(1)           | 49(1)           | 48(1)           | -10(1)          | -20(1)          | 0(1)            |
| C(11) | 73(2)           | 57(1)           | 51(1)           | -6(1)           | -20(1)          | 5(1)            |
| C(12) | 56(1)           | 43(1)           | 52(1)           | -16(1)          | -22(1)          | 4(1)            |
| O(13) | 62(1)           | 58(1)           | 77(1)           | -24(1)          | -20(1)          | -10(1)          |
| O(14) | 71(1)           | 66(1)           | 67(1)           | -36(1)          | -14(1)          | -1(1)           |
| C(15) | 102(2)          | 71(2)           | 77(2)           | -45(1)          | -26(1)          | 2(1)            |
| N(21) | 85(2)           | 63(1)           | 58(1)           | -20(1)          | -29(1)          | -11(1)          |
| C(22) | 45(1)           | 58(1)           | 45(1)           | -19(1)          | -8(1)           | -5(1)           |
| C(23) | 54(1)           | 54(1)           | 52(1)           | -25(1)          | -3(1)           | -14(1)          |
| C(24) | 53(1)           | 45(1)           | 52(1)           | -18(1)          | -2(1)           | -10(1)          |
| C(25) | 43(1)           | 42(1)           | 47(1)           | -16(1)          | -3(1)           | -7(1)           |
| C(26) | 42(1)           | 45(1)           | 45(1)           | -16(1)          | -7(1)           | -6(1)           |
| C(27) | 50(1)           | 44(1)           | 50(1)           | -15(1)          | -12(1)          | -4(1)           |
| C(28) | 46(1)           | 44(1)           | 51(1)           | -15(1)          | -6(1)           | -4(1)           |
| O(29) | 82(1)           | 51(1)           | 70(1)           | -16(1)          | -34(1)          | -8(1)           |
| O(30) | 83(1)           | 43(1)           | 63(1)           | -12(1)          | -23(1)          | -5(1)           |
| C(31) | 87(2)           | 56(1)           | 66(1)           | -9(1)           | -25(1)          | 6(1)            |
| C(32) | 59(1)           | 39(1)           | 47(1)           | -9(1)           | -20(1)          | -5(1)           |
| O(33) | 84(1)           | 65(1)           | 64(1)           | -18(1)          | -13(1)          | -33(1)          |
| O(34) | 66(1)           | 59(1)           | 65(1)           | -33(1)          | -14(1)          | 2(1)            |
| C(35) | 101(2)          | 60(1)           | 78(2)           | -41(1)          | -42(2)          | 23(1)           |

**Table AP5.** Hydrogen coordinates (  $\times 10^4$  ) and isotropic displacement parameters (  $\text{\AA}^2 \times 10^3$  ) for **1E2E4A**.

|        | x         | y        | z        | U(eq) |
|--------|-----------|----------|----------|-------|
| H(1A)  | 520(30)   | 8810(30) | 1150(20) | 91    |
| H(1B)  | -190(30)  | 7230(30) | 1290(20) | 91    |
| H(3)   | 2215030   | 267357   |          |       |
| H(4)   | 12614041  | 416954   |          |       |
| H(7)   | 15549297  | 253457   |          |       |
| H(11A) | 30062144  | 679792   |          |       |
| H(11B) | 28783750  | 704792   |          |       |
| H(11C) | 43713315  | 639592   |          |       |
| H(15A) | 142510423 | 5900115  |          |       |
| H(15B) | 241211228 | 4849115  |          |       |
| H(15C) | 31569914  | 5679115  |          |       |
| H(21A) | 4990(30)  | 6580(30) | 6630(20) | 98    |
| H(21B) | 5290(30)  | 8170(30) | 6640(20) | 98    |
| H(23)  | 55754255  | 799261   |          |       |
| H(24)  | 66343290  | 948159   |          |       |
| H(27)  | 63358588  | 804856   |          |       |
| H(31A) | 84851422  | 12080105 |          |       |
| H(31B) | 80612927  | 12434105 |          |       |
| H(31C) | 96372807  | 11750105 |          |       |
| H(35A) | 56769460  | 11495110 |          |       |
| H(35B) | 655710464 | 10457110 |          |       |
| H(35C) | 74719260  | 11250110 |          |       |

**Table AP6.** Hydrogen bonds for **1E2E4A** [ $\text{\AA}$  and  $^\circ$ ].

| D-H...A                | d(D-H)  | d(H...A) | d(D...A) | $\angle$ (DHA) |
|------------------------|---------|----------|----------|----------------|
| N(1)-H(1A)...O(33)#1   | 0.89(3) | 2.17(3)  | 3.054(3) | 168(2)         |
| N(1)-H(1B)...O(29)#2   | 0.85(3) | 2.15(3)  | 2.991(3) | 166(3)         |
| N(21)-H(21A)...O(9)    | 0.82(3) | 2.21(3)  | 2.958(3) | 151(3)         |
| N(21)-H(21B)...O(13)#1 | 0.91(3) | 2.18(3)  | 3.053(3) | 159(3)         |

Symmetry transformations used to generate equivalent atoms:

#1 -x+1,-y+2,-z+1    #2 x-1,y,z-1

## *Appendix III*

**Cartesian coordinates for the  
optimized structures (1E4A,  
1E2A4E5A, 1E2E3A, and 1E2E4A)**

**1E4A (GS)**

|   |           |           |           |
|---|-----------|-----------|-----------|
| C | -0.449354 | 1.293427  | 0.361146  |
| C | -1.813681 | 0.092587  | 0.437956  |
| C | -2.377748 | -0.124167 | 0.023158  |
| C | -1.52608  | -1.124053 | -0.469096 |
| C | -0.158635 | -0.920185 | -0.521497 |
| C | 0.404974  | 0.286709  | -0.099101 |
| C | 1.849756  | 0.604658  | -0.225527 |
| O | 2.248116  | 1.719939  | -0.473738 |
| O | 2.764623  | -0.385595 | -0.103242 |
| C | 2.552855  | -1.530303 | 0.722627  |
| N | -3.736238 | -0.347248 | 0.138197  |
| H | -0.021211 | 2.244588  | 0.658486  |
| H | -2.460003 | 1.88006   | 0.814676  |
| H | -1.947913 | -2.063877 | -0.813294 |
| H | 0.471612  | -1.703864 | -0.927472 |
| H | 3.472495  | -1.676268 | 1.292165  |
| H | 1.718219  | -1.385825 | 1.410102  |
| H | 2.370982  | -2.414221 | 0.106559  |
| H | -4.122643 | -1.071691 | -0.45105  |
| H | -4.322314 | 0.47504   | 0.180305  |

**1E4A (ES)**

|   |           |           |           |
|---|-----------|-----------|-----------|
| C | 0.581058  | 1.334282  | 0.080461  |
| C | 1.943324  | 1.133224  | 0.174376  |
| C | 2.499565  | -0.145299 | 0.046038  |
| C | 1.63363   | -1.225693 | -0.186473 |
| C | 0.271867  | -1.044234 | -0.280903 |
| C | -0.298345 | 0.246594  | -0.145477 |
| C | -1.680109 | 0.441575  | -0.23876  |
| O | -2.347565 | 1.566885  | -0.129345 |
| O | -2.58064  | -0.559265 | -0.476324 |
| C | -3.323852 | -1.010396 | 0.669332  |
| N | 3.882838  | -0.335387 | 0.085677  |
| H | 0.178981  | 2.33628   | 0.183651  |
| H | 2.59903   | 1.98338   | 0.344969  |
| H | 2.049681  | -2.22343  | -0.301897 |
| H | -0.37507  | -1.893594 | -0.470115 |
| H | -3.839463 | -1.915418 | 0.346819  |
| H | -2.642037 | -1.233506 | 1.494509  |
| H | -4.053465 | -0.259843 | 0.977922  |
| H | 4.173697  | -1.263060 | 0.364185  |
| H | 4.391589  | 0.375623  | 0.593995  |

## 1E2A4E5A (GS)

|   |          |          |          |
|---|----------|----------|----------|
| C | 1.38751  | -0.15423 | 0.0728   |
| C | 0.83852  | 1.14627  | 0.23898  |
| N | 1.61291  | 2.24952  | 0.49798  |
| C | -0.55574 | 1.25219  | 0.15341  |
| H | -1.0239  | 2.2194   | 0.27463  |
| C | -1.38922 | 0.15468  | -0.0741  |
| C | -2.85416 | 0.36627  | -0.12492 |
| O | -3.68779 | -0.51976 | -0.25201 |
| O | -3.21007 | 1.65266  | -0.0112  |
| C | -4.61391 | 1.92429  | -0.04056 |
| C | -0.84023 | -1.14582 | -0.24027 |
| N | -1.61462 | -2.24908 | -0.49927 |
| C | 0.55403  | -1.25175 | -0.1547  |
| H | 1.02219  | -2.21896 | -0.27593 |
| O | 3.20835  | -1.65223 | 0.00991  |
| C | 4.61219  | -1.92387 | 0.03926  |
| O | 3.68608  | 0.52019  | 0.25069  |
| H | 4.69929  | -3.004   | -0.06465 |
| H | 5.04491  | -1.59363 | 0.98573  |
| H | 5.11641  | -1.41731 | -0.7862  |
| H | -4.70102 | 3.00442  | 0.06338  |
| H | -5.11813 | 1.41772  | 0.78489  |
| H | -5.04662 | 1.59407  | -0.98703 |
| C | -1.08574 | -3.59049 | -0.49451 |
| H | -0.36516 | -3.74361 | -1.3074  |
| H | -1.91178 | -4.28642 | -0.64672 |
| H | -0.5906  | -3.8447  | 0.45405  |
| H | -2.61071 | -2.11468 | -0.41096 |
| C | 1.08402  | 3.59094  | 0.49318  |
| H | 0.36342  | 3.74407  | 1.30606  |
| H | 0.58889  | 3.84512  | -0.45539 |
| H | 1.91006  | 4.28687  | 0.64539  |
| H | 2.60899  | 2.11513  | 0.40964  |

## 1E2A4E5A (ES)

C 2.869259429 -0.3440283917 0.1287134247  
C 1.43429463 -0.1720048823 0.0638828802  
C 0.8218380826 1.133789635 0.1837100747  
N 1.615897337 2.210316663 0.3599754439  
C -0.5764052294 1.267366467 0.116452108  
H -1.016557807 2.25136825 0.2072919182  
C -1.436011677 0.1724425452 -0.0651897601  
C -2.870976498 0.3444659678 -0.1300198125  
O -3.712704771 -0.5550425459 -0.2886163785  
O -3.258029486 1.634697701 0.0023578769  
C -4.661918707 1.876512456 -0.0531079997  
C -0.8235551002 -1.133351908 -0.1850175466  
N -1.617614312 -2.209878854 -0.361283588  
C 0.5746881931 -1.266928776 -0.1177592233  
H 1.014840786 -2.250930546 -0.2085991002  
O 3.256312316 -1.634260249 -0.0036633206  
C 4.66020149 -1.876075132 0.0518031697  
O 3.710987738 0.555480138 0.2873096959  
H 4.774666225 -2.952447436 -0.0715768345  
H 5.070442873 -1.558524124 1.013374766  
H 5.177309918 -1.344780411 -0.750795054  
H -4.776383542 2.952884639 0.0702729658  
H -5.179026836 1.34521697 0.7494899101  
H -5.072160329 1.558962228 -1.014679752  
C -1.151393415 -3.568001989 -0.4985929618  
H -0.4978526488 -3.676790739 -1.371814832  
H -2.016223508 -4.218244921 -0.6263028977  
H -0.5982979437 -3.88963703 0.3913809392  
H -2.616565895 -2.001089165 -0.3963947198  
C 1.149676476 3.568439914 0.4972837248  
H 0.4961356909 3.677229387 1.370505492  
H 0.5965810281 3.890074245 -0.3926904501  
H 2.014506579 4.218682929 0.6249931678  
H 2.614848912 2.001526965 0.3950866734

## 1E2E3A (GS)

|   |           |          |           |          |
|---|-----------|----------|-----------|----------|
| C | -2.9823   | 0.474278 |           | -0.89786 |
| C | -1.604980 | 0.382325 |           | -0.62676 |
| C | -0.886841 | 0.573829 |           | -0.38471 |
| C | -1.572382 | 0.802917 |           | -0.40333 |
| C | -2.924172 | 0.870334 |           | -0.69062 |
| C | -3.625811 | 0.692451 |           | -0.93803 |
| H | -3.53355  | -0.44108 | -1.095    |          |
| H | -3.416343 | 0.835234 |           | -0.71129 |
| H | -4.688111 | 0.729929 |           | -1.15849 |
| C | -0.907744 | 0.102688 |           | -0.06724 |
| O | -1.028845 | 0.11223  | -0.71676  |          |
| O | -0.251574 | 0.041751 |           | 1.101369 |
| C | 0.479857  |          | 5.21925   | 1.439842 |
| H | 0.917589  |          | 5.024812  | 2.418369 |
| H | 1.262291  |          | 5.397324  | 0.698783 |
| H | -0.181766 | 0.086705 |           | 1.479514 |
| C | 0.592216  |          | 1.611226  | -0.24836 |
| O | 1.293264  |          | 2.522629  | -0.61943 |
| O | 1.114883  |          | 0.506724  | 0.335825 |
| C | 2.540468  |          | 0.505307  | 0.453075 |
| H | 2.796576  |          | -0.442110 | 0.925788 |
| H | 3.005873  |          | 0.585101  | -0.5311  |
| H | 2.8694    | 1.343349 |           | 1.069743 |
| N | -1.00219  | -0.85544 | -0.68316  |          |
| H | -0.13274  | -0.95607 | -0.18188  |          |
| H | -1.6217   | -1.65012 | -0.63393  |          |



### 1E2E3A (ES)

|   |           |          |           |          |
|---|-----------|----------|-----------|----------|
| C | -2.9823   | 0.474278 |           | -0.89786 |
| C | -1.604980 | 0.382325 |           | -0.62676 |
| C | -0.886841 | 0.573829 |           | -0.38471 |
| C | -1.572382 | 0.802917 |           | -0.40333 |
| C | -2.924172 | 0.870334 |           | -0.69062 |
| C | -3.625811 | 0.692451 |           | -0.93803 |
| H | -3.53355  | -0.44108 | -1.095    |          |
| H | -3.416343 | 0.835234 |           | -0.71129 |
| H | -4.688111 | 0.729929 |           | -1.15849 |
| C | -0.907744 | 0.102688 |           | -0.06724 |
| O | -1.028845 | 0.11223  | -0.71676  |          |
| O | -0.251574 | 0.041751 |           | 1.101369 |
| C | 0.479857  |          | 5.21925   | 1.439842 |
| H | 0.917589  |          | 5.024812  | 2.418369 |
| H | 1.262291  |          | 5.397324  | 0.698783 |
| H | -0.181766 | 0.086705 |           | 1.479514 |
| C | 0.592216  |          | 1.611226  | -0.24836 |
| O | 1.293264  |          | 2.522629  | -0.61943 |
| O | 1.114883  |          | 0.506724  | 0.335825 |
| C | 2.540468  |          | 0.505307  | 0.453075 |
| H | 2.796576  |          | -0.442110 | 0.925788 |
| H | 3.005873  |          | 0.585101  | -0.5311  |
| H | 2.8694    | 1.343349 |           | 1.069743 |
| N | -1.00219  | -0.85544 | -0.68316  |          |
| H | -0.13274  | -0.95607 | -0.18188  |          |
| H | -1.6217   | -1.65012 | -0.63393  |          |

**1E2E4A (GS)**

|   |           |           |           |           |
|---|-----------|-----------|-----------|-----------|
| C | 2.831719  | -0        | 0.209312  | 0.090983  |
| C | 1.798849  |           | 0.733164  | 0.022415  |
| C | 0.471892  |           | 0.337578  | -0.076835 |
| C | 0.142975  |           | -1.025326 | -0.09062  |
| C | 1.175981  |           | -1.958366 | -0.052539 |
| C | 2.50008   | -1.567183 | 0.039143  |           |
| H | 0.918212  |           | -3.011358 | -0.084619 |
| H | 3.287616  |           | -2.314776 | 0.071022  |
| C | -1.245313 | -1.559898 | -0.094195 |           |
| O | -1.580097 | -2.572182 | -0.665386 |           |
| O | -2.072485 | -0.843821 | 0.682237  |           |
| C | -3.439234 | -1.249707 | 0.645402  |           |
| H | -3.963431 | -0.58524  | 1.33129   |           |
| H | -3.837014 | -1.144235 | -0.366214 |           |
| H | -3.540728 | -2.289367 | 0.963111  |           |
| C | -0.565544 | 1.386172  | -0.318418 |           |
| O | -1.513069 | 1.262314  | -1.055654 |           |
| O | -0.290432 | 2.526776  | 0.33918   |           |
| C | -1.202973 | 3.596845  | 0.091292  |           |
| H | -0.843869 | 4.435316  | 0.686745  |           |
| H | -1.214235 | 3.854481  | -0.969964 |           |
| H | -2.212801 | 3.314352  | 0.395422  |           |
| H | 2.035837  | 1.791555  | 0.022492  |           |
| N | 4.153695  | 0.200833  | 0.14422   |           |
| H | 4.317047  | 1.130934  | 0.502325  |           |
| H | 4.815558  | -0.475989 | 0.496065  |           |

## 1E2E4A (ES)

|   |           |           |           |
|---|-----------|-----------|-----------|
| C | -2.762257 | -0.24039  | -0.180917 |
| C | -1.739505 | 0.709447  | -0.361301 |
| C | -0.424776 | 0.419713  | 0.054281  |
| C | -0.143823 | -0.986311 | 0.239738  |
| C | -1.177079 | -1.906645 | 0.488716  |
| C | -2.49875  | -1.552782 | 0.322791  |
| H | -0.896598 | -2.921613 | 0.748671  |
| H | -3.311184 | -2.250733 | 0.489973  |
| C | 1.223401  | -1.539996 | 0.126354  |
| O | 1.646377  | -2.387353 | 0.88807   |
| O | 1.904697  | -1.053187 | -0.912741 |
| C | 3.292052  | -1.383589 | -0.93671  |
| H | 3.683976  | -0.943065 | -1.852668 |
| H | 3.78617   | -0.950097 | -0.064797 |
| H | 3.43498   | -2.466283 | -0.938472 |
| C | 0.594458  | 1.408009  | 0.275747  |
| O | 1.724063  | 1.187872  | 0.705306  |
| O | 0.167425  | 2.670662  | -0.038521 |
| C | 1.128154  | 3.689239  | 0.192657  |
| H | 0.646358  | 4.626203  | -0.08986  |
| H | 1.4243    | 3.718014  | 1.244619  |
| H | 2.024599  | 3.527605  | -0.411877 |
| H | -1.96896  | 1.673154  | -0.804781 |
| N | -4.036733 | 0.077093  | -0.505588 |
| H | -4.272941 | 0.991702  | -0.861025 |
| H | -4.785319 | -0.588663 | -0.385699 |
